# Supplementary material for: Combined Metabolome and Transcriptome Analyses Unveil the Molecular Mechanisms of Fruit Acidity Variation in Litchi (Litchi chinensis Sonn.)
Source: Int J Mol Sci. 2023 Jan 18;24(3):1871. doi: 10.3390/ijms24031871 (PMC9916176; doi:10.3390/ijms24031871)
Supplement: Supplementary file 1 [file ijms-24-01871-s001.zip › Supplementary Tables.xlsx]

## Sheet: Table S1
Table S1. List of the 401 identified metabolites and their average relative content in pulps of HZ and B8 at different development stages.
Index	Q1 (Da)	Q3 (Da)	Molecular Weight (Da)	Formula	Ionization model	Compounds	Class	CAS	cpd_ID	Average relative content
										HZS1	HZS2	HZS3	HZS4	HZS5	B8S1	B8S2	B8S3	B8S4	B8S5	mix
pme3200	74	57	73.064	C2H7N3	[M+H]+	1-methylguanidine	Nucleotides and derivatives	471-29-4	C02294	16750.7	13019	9	9	9	14793.6	12863	13480.3	13793.7	6754.53	16413.5
ML10198895	88.04	88.04	89.048	C3H7NO2	[M-H]-	N-Methylglycine	Amino acids and derivatives	107-97-1	C00213	2510.3	7786.1	14427	17753.7	16168.3	2974.83	3788.9	5018.73	10918.3	9875.67	7908.4
Lmgn000188	89.02	59.01	90.032	C3H6O3	[M-H]-	D-Lactic Acid	Organic acids	10326-41-7	C00256	12575.1	15995.7	14986.3	17611.6	21488	9001.67	10959.6	22810.7	23470	16270.7	19719.2
Lmqp000873	101.02	55.02	100.018	C4H4O3	[M+H]+	Succinic anhydride	Organic acids	108-30-5	C19524	5016100	1749400	1.07113e+06	749767	1457500	9.41253e+06	8.61413e+06	11064000	4.68393e+06	1.50967e+06	5480175
mws4052	102.05	56.05	101.048	C4H7NO2	[M+H]+	1-Aminocyclopropane-1-carboxylic acid	Organic acids	22059-21-8	C01234	442073	484777	559157	527550	218490	458230	576207	534273	788253	983500	554692
Lmgn000219	101.02	55.02	102.032	C4H6O3	[M-H]-	Succinic semialdehyde	Organic acids	692-29-5	C00232	45288.3	48897.7	46522.3	47479	64582.7	23854	36373.7	41095.7	57116.3	53031	47466.5
pme3033	104.07	86	103.063	C4H9NO2	[M+H]+	N,N-Dimethylglycine	Amino acids and derivatives	1118-68-9	C01026	2.39527e+06	7.00433e+06	4.96317e+06	8.18357e+06	10030500	458190	1.38323e+06	1.81007e+06	3.04713e+06	1.43597e+06	3734025
pme3017	104.07	58	103.063	C4H9NO2	[M+H]+	2-Aminoisobutyric acid	Amino acids and derivatives	62-57-7	C03665	670920	711490	2.20677e+06	3585100	6470200	510683	545823	537810	537313	730467	1838000
pme3011	104.07	68.8	103.063	C4H9NO2	[M+H]+	γ-Aminobutyric acid	Organic acids	56-12-2	C00334	3.65237e+06	1.07943e+07	7647200	1.25177e+07	1.52387e+07	689947	2366600	3308300	4.75837e+06	2.32267e+06	5845475
mws0206	103.04	57.03	104.047	C4H8O3	[M-H]-	2-Hydroxybutyric Acid	Organic acids	3347-90-8	C05984	5093.3	11020.3	22702	31833	36343.7	12443.7	11552.3	12258	14355.7	14298.7	13824.5
pme1975	103	59	104.06	C3H4O4	[M-H]-	Malonic acid	Organic acids	141-82-2	C00383	1705200	2.48307e+06	3.74927e+06	4.52063e+06	4738800	1.34643e+06	1.79257e+06	1.75457e+06	2699000	2.91933e+06	1529225
pme0010	106	60	105.043	C3H7NO3	[M+H]+	L-Serine	Amino acids and derivatives	56-45-1	C00065	294847	344557	467150	659937	778577	145060	167340	148940	224823	289867	390380
mws0255	112.05	95	111.043	C4H5N3O	[M+H]+	Cytosine	Nucleotides and derivatives	71-30-7	C00380	1.56137e+06	1002510	1.19477e+06	787660	988950	1902100	1.91653e+06	1.71493e+06	2585900	2.62343e+06	1469125
pme2122	112.09	95	111.08	C5H9N3	[M+H]+	Histamine	Amino acids and derivatives	51-45-6	C00388	1099420	689680	857033	543937	684443	1.59367e+06	1.47353e+06	1.24447e+06	1783300	2011600	1077925
pme0257	111.02	80	112.027	C4H4N2O2	[M-H]-	Uracil	Nucleotides and derivatives	66-22-8	C00106	65767.7	72579	125576	115266	136830	75110.3	81667	51063.7	70393.3	113671	78177.2
pme0006	116.07	70.1	115.063	C5H9NO2	[M+H]+	L-Proline	Amino acids and derivatives	147-85-3	C00148	492637	1588700	1.07087e+06	2.32803e+06	2227600	413790	632007	626010	832507	966193	1226700
mws0376	115	71	116.011	C4H4O4	[M-H]-	Fumaric acid	Organic acids	110-17-8	C00122	9	323703	284297	215827	317857	9	9	9	9	9	192252
pme2935	115	69	116.047	C5H8O3	[M-H]-	2-Oxovaleric acid	Organic acids	1821-02-9	C06255	5765.8	2512.3	9	9	9	9	4613.87	3936.3	2572.87	1788.93	3316.47
mws0256	118.09	72.1	117.079	C5H11NO2	[M+H]+	L-Valine	Amino acids and derivatives	72-18-4	C00183	3.49207e+06	7.16437e+06	8.00443e+06	8.53963e+06	10960000	3.38547e+06	4.92883e+06	5.14037e+06	5368300	5976100	6776800
pme0120	118.09	101	117.079	C5H11NO2	[M+H]+	5-Aminovaleric acid	Amino acids and derivatives	660-88-8	C00431	494727	659630	171843	158943	103327	73817.3	294077	378567	407560	170000	549642
mws0192	117.02	73	118.027	C4H6O4	[M-H]-	Succinic acid	Organic acids	110-15-6	C00042	3.14137e+06	1.18257e+06	829703	660473	1.32197e+06	6.56833e+06	6353300	7.89447e+06	3.46323e+06	1.25313e+06	3908425
mws0470	117.02	73	118.027	C4H6O4	[M-H]-	Methylmalonic acid	Organic acids	516-05-2	C02170	3134700	1129100	821453	646377	1255100	6.58133e+06	6.17877e+06	7.68643e+06	3531600	1.25913e+06	3847175
mws0147	117.06	59	118.063	C5H10O3	[M-H]-	β-Hydroxyisovaleric acid	Organic acids	625-08-1	C20827	58223.7	110330	98392	98331	190040	29924.3	45695.7	34402	43132	39320.3	71128.8
pme3096	118	74	119.022	C3H5NO4	[M-H]-	Aminomalonic acid	Organic acids	1068-84-4	C00872	3.57633e+06	1.45123e+06	1.0206e+06	799340	1.58937e+06	7.44447e+06	7.26397e+06	8.95937e+06	4151500	1488600	4533875
mws0230	120.07	74	119.058	C4H9NO3	[M+H]+	L-Threonine	Amino acids and derivatives	72-19-5	C00188	709417	520147	566203	470317	721907	753603	711347	668257	779877	840057	617302
mws0671	120.07	74.1	119.058	C4H9NO3	[M+H]+	L-Homoserine	Organic acids	672-15-1	C00263	719583	618663	569253	494073	739307	809010	712473	720727	963073	875280	695785
pma0134	121.04	93.06	120.042	C4H8O4	[M+H]+	D-(-)-Threose	Saccharides and Alcohols	95-43-2	C06463	26308.3	23422.7	6944.67	3285.13	27314.3	66063	67844.3	4469.83	8656.57	10842.6	23521.5
Lmgp002593	123.04	77.04	122.037	C7H6O2	[M+H]+	3-hydroxybenzaldehyde	Organic acids	100-83-4	C03067	36418.3	40247.7	30365.3	24699.3	22564.3	54322.3	43137.3	29869	21659.3	22835	37675.2
mws0133	123.06	80.05	122.048	C6H6N2O	[M+H]+	Nicotinamide	Vitamin	98-92-0	C00153	159000	315233	457630	421990	310707	207047	211873	200327	261000	325147	291808
pme2134	121	59	122.058	C4H10O4	[M-H]-	D-Threitol	Saccharides and Alcohols	2418-52-2	C16884	674810	730247	754623	763620	803413	722800	710693	752333	826003	796627	767158
pme0490	124.04	78	123.032	C6H5NO2	[M+H]+	Nicotinic acid (Vitamin B3)*	Vitamin	59-67-6	C00253	24770.3	47076	71458	76537	157343	61201.7	24152.7	31894.7	24256	31327.3	61288.5
Lmbp000668	124.04	78.03	123.032	C6H5NO2	[M+H]+	Isonicotinic acid*	Organic acids	55-22-1	C07446	20784.7	42924.3	66237.7	71600	149200	62308.3	25351	27680.7	24570.3	23742	56053.8
mws0236	124.01	80	125.015	C2H7NO3S	[M-H]-	2-Aminoethanesulfonic acid	Organic acids	107-35-7	C00245	1301.75	2370.83	4061.77	2121.8	9459.43	5963	8305.93	7724.67	10241.4	13050	8836.92
pmb0302	126.1	96	125.024	C2H8NO3P	[M+H]+	2-Aminoethylphosphonate	Lipids	2041-14-7	C03557	14248	8790.2	3259	2182.67	9	10747.4	11714.9	7126.6	2544.03	9	7552.3
mws0572	126.07	109	125.059	C5H7N3O	[M+H]+	5-Methylcytosine	Nucleotides and derivatives	554-01-8	C02376	6401.37	4469.47	11213.3	7171.83	13800.3	22854	13456	10339.7	13688	15440	10430.1
mws0263	128.04	82.03	129.043	C5H7NO3	[M-H]-	5-Oxo-L-Proline	Amino acids and derivatives	98-79-3	C01879	5615.43	10245.3	5981.17	11480.9	12618.7	16915.7	13307.3	13992.4	35174.3	115929	24814.2
ML10181668	130.09	84.08	129.079	C6H11NO2	[M+H]+	Cycloleucine	Amino acids and derivatives	52-52-8	C03969	1.99707e+06	1596740	2.06117e+06	3.68873e+06	3.45183e+06	1252700	2059200	1.85443e+06	4.37457e+06	6.36063e+06	2261975
Rfmb319	130.09	84.08	129.079	C6H11NO2	[M+H]+	Pipecolic acid	Amino acids and derivatives	4043-87-2	C00408	1.01246e+06	487347	916097	1025500	1146200	5758200	6.06373e+06	4.01693e+06	3.51667e+06	2776400	2450325
mws0216	132.07	86	131.058	C5H9NO3	[M+H]+	Trans-4-Hydroxy-L-proline	Amino acids and derivatives	51-35-4	C01157	52959	70439	49817	49759.3	81995.7	112280	40107.7	42459.3	31255.7	29169	29003.5
mws0712	130.05	86	131.058	C5H9NO3	[M-H]-	N-Propionylglycine	Amino acids and derivatives	21709-90-0	--	771530	338047	65421	27846	9	740090	677070	597557	403630	343073	442078
Zmpn000638	130.05	88.04	131.069	C4H9N3O2	[M-H]-	3-Guanidinopropionic acid	Organic acids	353-09-3	C03065	34064.7	74114.3	101866	155247	140170	55802	75295.3	64412.3	121553	129900	101361
pme0274	132.1	69	131.095	C6H13NO2	[M+H]+	6-Aminocaproic acid	Organic acids	60-32-2	C02378	2060000	6.31673e+06	9.96723e+06	9.75677e+06	1.59267e+07	2.71297e+06	2.78277e+06	2497100	2.62313e+06	2.83203e+06	7492375
mws0227	132.1	86.2	131.095	C6H13NO2	[M+H]+	L-Leucine*	Amino acids and derivatives	61-90-5	C00123	811213	2.46363e+06	3.64973e+06	3696000	5932000	1.04857e+06	1.03803e+06	965397	964583	1.11027e+06	2736150
mws0258	132.1	86	131.095	C6H13NO2	[M+H]+	L-Isoleucine*	Amino acids and derivatives	73-32-5	C00407	765250	2.37063e+06	3.57487e+06	3.54907e+06	5887400	1042920	1.04123e+06	948760	968267	1.08817e+06	2660250
mws1587	132.1	86	131.095	C6H13NO2	[M+H]+	L-Norleucine*	Amino acids and derivatives	327-57-1	C01933	127687	260930	401600	424207	622800	159230	168577	163120	204877	246843	323650
Lmbn001364	131.03	87.05	132.042	C5H8O4	[M-H]-	4-Hydroxy-2-Oxopentanoic Acid	Organic acids	3318-73-8	C03589	692033	645813	474810	413127	417790	787130	597503	549417	541587	413160	533622
Lmbn001288	131.03	87.04	132.042	C5H8O4	[M-H]-	2-Hydroxy-2-methyl-3-oxobutanoic acid	Organic acids	71698-08-3	C06010	654837	586693	435853	387470	383030	748907	563713	517397	503083	433180	521630
mws0473	131.03	87.05	132.042	C5H8O4	[M-H]-	2-Methylsuccinic acid	Organic acids	498-21-5	--	7.00487e+06	6.78103e+06	4839400	4481200	4.53963e+06	7.70837e+06	5.95253e+06	5.49213e+06	5.35797e+06	4.74547e+06	5721225
pme0243	131.03	87.05	132.042	C5H8O4	[M-H]-	Glutaric acid	Organic acids	110-94-1	C00489	133523	216820	468110	681223	534490	549580	1.06687e+06	988543	1.63987e+06	1.67803e+06	739430
pme3034	131.03	69.03	132.042	C5H8O4	[M-H]-	Ethylmalonic acid	Organic acids	601-75-2	--	7173.47	6427.7	17871	24281.7	18432	19287.3	36804	38366	57745.7	61675.3	26884.2
Lmmn002164	131.03	87.05	132.042	C5H8O4	[M-H]-	Monomethyl succinate	Organic acids	3878-55-5	--	663337	667337	471493	428157	431267	778230	585753	548737	530607	472953	527642
Lmmn000806	131.03	87.05	132.042	C5H8O4	[M-H]-	Dimethylmalonic acid	Organic acids	595-46-0	--	697120	675540	492243	440597	434163	804600	616557	563673	547080	500410	563540
Lmgn000160	131.05	70.03	132.053	C4H8N2O3	[M-H]-	3-Ureidopropionic Acid	Organic acids	462-88-4	C02642	5921.9	19313.7	19745.7	43824.3	62221.3	6977.9	12655.3	14790.3	22442.3	44524.7	17666.5
mws0001	133.06	74	132.054	C4H8N2O3	[M+H]+	L-Asparagine	Amino acids and derivatives	70-47-3	C00152	123446	201587	233257	491660	714727	164050	190843	181007	473463	601723	239478
pme2527	133	116	132.09	C5H12N2O2	[M+H]+	L-Ornithine	Amino acids and derivatives	70-26-8	C00077	12701.7	25966	26386.7	30174.7	15871.3	14300.7	23770	14507	12702.5	19873.3	19603.2
mws0219	132.03	88	133.038	C4H7NO4	[M-H]-	L-Aspartic Acid	Amino acids and derivatives	56-84-8	C00049	4.62917e+06	8102000	5.39427e+06	7522100	4.33533e+06	3.08227e+06	5589200	6.05053e+06	1.06817e+07	1.54173e+07	5952600
mws0275	133.01	71.01	134.022	C4H6O5	[M-H]-	L-Malic acid	Organic acids	97-67-6	C00149	4.46507e+06	3.71953e+06	2590400	2.40143e+06	1770300	4.02967e+06	5074100	4.43893e+06	4.19827e+06	3.93903e+06	4302875
Lmbn000198	133.01	71.01	134.022	C4H6O5	[M-H]-	3-Dehydro-L-Threonic Acid	Organic acids	-	C03064	5.12837e+06	4.30503e+06	3.31063e+06	2.76613e+06	2.09697e+06	4.79427e+06	4.78887e+06	5817700	5.34773e+06	4656500	4727200
pme0057	136.04	118.1	135.035	C4H9NO2S	[M+H]+	L-Homocysteine	Amino acids and derivatives	6027-13-0	C00155	43282.7	25500.3	12646.3	20450.7	15757.3	39303	37424.3	29907	28678	19255.7	31617.8
pme0040	136.06	119	135.054	C5H5N5	[M+H]+	Adenine	Nucleotides and derivatives	73-24-5	C00147	231580	1.64083e+06	4.23213e+06	4.55437e+06	5.82503e+06	299173	319943	335873	1797400	2.25533e+06	1233100
pmb0374	136.06	118.9	135.054	C5H5N5	[M+H]+	2-Aminopurine	Nucleotides and derivatives	452-06-2	--	14016.7	15975	9	9	9	17269.7	20159.3	19720.3	19686.7	16716.7	18869.5
mws0889	135.03	75.01	136.037	C4H8O5	[M-H]-	D-Threonic Acid	Saccharides and Alcohols	3909-12-4	C21649	181340	432320	700657	537147	1138700	288770	399017	458257	594413	680713	432908
pme0033	137.05	119	136.039	C5H4N4O	[M+H]+	Hypoxanthine	Nucleotides and derivatives	68-94-0	C00262	9	8736.33	14538	24102	23307.3	12891.3	7956.47	4947.67	10603.2	11201.1	8181.8
pme1173	137.05	110	136.039	C5H4N4O	[M+H]+	Allopurinol	Nucleotides and derivatives	315-30-0	--	5937.73	4846.3	6528.87	18284.3	9509.83	22437	10791.5	20218	24288	13465	13240.2
pme1002	138.09	103	137.084	C8H11NO	[M+H]+	L-Tyramine	Amino acids and derivatives	51-67-2	C00483	1504600	603313	254853	229060	187393	2.95583e+06	2.54857e+06	971093	351733	258803	999618
Lmbn002862	137.02	93.03	138.032	C7H6O3	[M-H]-	3-Hydroxybenzoic Acid	Organic acids	99-06-9	C00587	910600	964893	681457	1.35697e+06	1.62743e+06	670023	836797	671697	805337	771627	862655
mws0336	137.04	93.05	138.043	C6H6N2O2	[M-H]-	Urocanic acid	Organic acids	104-98-3	C00785	133483	65609.7	17494.3	44994	9	279553	126240	100421	54154	35521.7	93455.5
pme3207	141.02	59	142.027	C6H6O4	[M-H]-	Muconic acid	Organic acids	1119-72-8	C02480	132737	121426	95567.3	155273	280003	51831.3	82750	67150.7	147340	128063	304100
Rfmb320	144.1	84.08	143.095	C7H13NO2	[M+H]+	1-Methylpiperidine-2-carboxylic acid	Amino acids and derivatives	7730-87-2	--	165870	116762	88648.7	74146.3	75950	185453	188497	177307	148050	146847	134870
Hmsp000364	144.1	98.09	143.095	C7H13NO2	[M+H]+	L-Cyclopentylglycine	Amino acids and derivatives	2521-84-8	--	791883	698303	709757	676937	563450	1.57953e+06	1580300	1.47137e+06	1.50803e+06	1450300	1119500
mws0340	143.03	111	144.042	C6H8O4	[M-H]-	2,3-Dimethylsuccinic acid	Amino acids and derivatives	13545-04-5	--	27151.3	6905.07	2654.67	2854.2	1795.4	30498.3	34218	33635.3	13081.7	8969.53	14481.2
Rfmb318	144.1	84.08	144.092	C7H14NO2+	[M]+	D-Proline betaine	Amino acids and derivatives	1195-94-4	C21514	71508	53987.7	43614	37566.7	45811	73423.3	63795.7	62165	61055.7	69983.7	61238.5
Lmqp000427	146.08	82.07	145.074	C6H11NO3	[M+H]+	N-Methyl-Trans-4-Hydroxy-L-Proline	Amino acids and derivatives	4252-82-8	--	349567	178270	131973	110215	150927	477030	332013	317997	300010	304573	233115
pme0295	146.08	86	145.074	C6H11NO3	[M+H]+	4-Acetamidobutyric acid	Organic acids	3025-96-5	C02946	39294	158440	203393	352463	317873	24776	41904.3	40025.7	102990	173033	154555
mws0567	146.09	87	145.085	C5H11N3O2	[M+H]+	4-Guanidinobutyric acid	Organic acids	463-00-3	C01035	7.69027e+06	9086200	9.19843e+06	5.91837e+06	8810500	1.04993e+07	6.32963e+06	7141200	5853200	8.41047e+06	7778725
pme2380	145.01	101	146.022	C5H6O5	[M-H]-	α-Ketoglutaric acid	Organic acids	328-50-7	C00026	7087100	1492700	547500	612547	97577.7	10066100	4942000	4.87807e+06	2.51843e+06	1.23527e+06	3232825
Wmzn000227	145.06	109.04	146.058	C6H10O4	[M-H]-	2,2-Dimethylsuccinic acid	Organic acids	597-43-3	--	28103.7	48200	33380.7	112625	100302	43027	72504.3	87430.7	93185.7	177963	62656.2
mws0208	145.05	101	146.058	C6H10O4	[M-H]-	Adipic Acid	Organic acids	124-04-9	C06104	447907	417207	462193	380527	325933	1584200	1.18677e+06	873847	730457	805433	693620
Lmbn001609	145.05	83.05	146.058	C6H10O4	[M-H]-	2-Acetyl-2-Hydroxybutanoic Acid	Organic acids	-	C06006	11577.7	11210.1	12682.3	10996.2	10495.7	38798	33153.7	22780.7	20439.7	22069	17793.8
mws0924	145.05	101	146.058	C6H10O4	[M-H]-	2-Methylglutaric acid	Organic acids	617-62-9	--	393660	324943	388880	314737	264270	1.31083e+06	991350	745783	601280	674167	560825
Lmbn001676	145.05	101.06	146.058	C6H10O4	[M-H]-	3-Hydroxy-3-Methyl-2-Oxopentanoic Acid	Organic acids	-	C14463	45004.7	41513.7	50200.7	34881.3	35604.7	173273	111177	83775.7	75005	83859.3	71592
pme0193	147.08	84	146.069	C5H10N2O3	[M+H]+	L-Glutamine	Amino acids and derivatives	56-85-9	C00064	4.62553e+06	8339200	1.01511e+07	1.08361e+07	12634000	2.64487e+06	4279000	4.54143e+06	6.12377e+06	6.24603e+06	6523650
pme0026	147.11	84	146.106	C6H14N2O2	[M+H]+	L-Lysine	Amino acids and derivatives	56-87-1	C00047	60204.7	118717	150703	157877	209043	38787.3	61583	58554.3	90519	89103.3	92653
mws1050	148.06	88	147.053	C5H9NO4	[M+H]+	O-Acetylserine	Amino acids and derivatives	5147-00-2	C00979	4494000	1.31827e+06	897147	752880	968420	3906300	3.14733e+06	2800100	2.35903e+06	1.80123e+06	2056625
Zmzn000113	146.05	102.06	147.053	C5H9NO4	[M-H]-	L-threo-3-Methylaspartate	Amino acids and derivatives	6061-13-8	C03618	438180	1707300	3.14207e+06	4755200	1.54367e+06	489013	1018770	1285300	1.97673e+06	2.92487e+06	1374550
pme0014	148.06	84	147.053	C5H9NO4	[M+H]+	L-Glutamic acid	Amino acids and derivatives	56-86-0	C00025	453953	620547	1.00145e+06	869440	381850	404677	690653	705613	972820	1.27307e+06	716195
ML10171848	147.03	85.03	148.037	C5H8O5	[M-H]-	D-Arabinono-1,4-lactone	Saccharides and Alcohols	2782-09-4	C00652	2.26543e+06	2.46443e+06	913850	324707	146543	2.92847e+06	3.10693e+06	2.79487e+06	2.30323e+06	2248900	2021400
pme3154	147.07	59.01	148.074	C6H12O4	[M-H]-	Mevalonic acid	Organic acids	150-97-0	C00418	970613	1041120	385170	163100	72850.7	1.24153e+06	1.24273e+06	1.16317e+06	945517	907917	839418
pme1210	150.06	61	149.051	C5H11NO2S	[M+H]+	L-Methionine	Amino acids and derivatives	63-68-3	C00073	1.13981e+06	6.88667e+06	2.69633e+07	3.02093e+07	25722000	1178500	1707300	2243300	4.92407e+06	1.07313e+07	16618500
mws0847	150.08	133	149.07	C6H7N5	[M+H]+	1-Methyladenine	Nucleotides and derivatives	5142-22-3	C02216	26414	165680	817130	1.08868e+06	801507	29807.7	41554.3	52563.3	108328	262663	396655
mws0262	149.01	87	150.016	C4H6O6	[M-H]-	L-Tartaric acid	Organic acids	87-69-4	C00898	137153	148787	59633.3	9	9	172713	168097	158837	126590	128690	112756
mws1499	149.05	59.01	150.053	C5H10O5	[M-H]-	D-Arabinose	Saccharides and Alcohols	10323-20-3	C00216	143897	188990	216610	237593	276867	112255	179170	184587	223463	291277	202975
pmf0420	149.06	74.9	150.068	C9H10O2	[M-H]-	Benzyl acetate	Organic acids	140-11-4	C15513	9681.73	17796.3	20742.7	21261.3	26966.7	15520.3	17778.3	14583	18523.7	16076.3	20971.2
pme1109	152.06	135	151.049	C5H5N5O	[M+H]+	Guanine*	Nucleotides and derivatives	73-40-5	C00242	68313.7	144153	418757	849147	1.09406e+06	93126.7	119370	79024.3	97391	114700	206802
pme0183	152.06	135	151.049	C5H5N5O	[M+H]+	Isoguanine*	Nucleotides and derivatives	3373-53-3	--	113390	217023	943410	1404700	1.12125e+06	128970	168597	143117	200477	353437	486570
pme0256	151.03	151	152.033	C5H4N4O2	[M-H]-	Xanthine	Nucleotides and derivatives	69-89-6	C00385	23533.7	11007.3	44875	91930	182083	31813.3	46868	33868	27203.7	18421.3	21845
mws0639	153.02	109.03	154.027	C7H6O4	[M-H]-	2,3-Dihydroxybenzoic Acid	Organic acids	303-38-8	C00196	804680	266193	110327	126609	60249	2.99773e+06	771727	710927	293277	332487	662688
pmb3099	153.03	125	154.039	C4H11O4P	[M-H]-	Diethyl phosphate	Organic acids	598-02-7	C06608	133397	181727	135027	186210	224927	101184	195063	121120	124043	156740	154675
mws0254	156.08	110	155.069	C6H9N3O2	[M+H]+	L-Histidine	Amino acids and derivatives	71-00-1	C00135	249257	1407600	1.13565e+06	1.28167e+06	2.05343e+06	260797	428097	365377	511490	720080	622335
pme2165	155.01	111	156.017	C5H4N2O4	[M-H]-	Orotic acid	Vitamin	65-86-1	C00295	9	18848.3	21409	23263	17707.7	24161.3	18416	23596.7	30625	21567.7	24432.8
pmf0174	157.16	157.2	158.167	C10H22O	[M-H]-	1-Decanol	Saccharides and Alcohols	112-30-1	C01633	5.42627e+06	6.10797e+06	5367600	5.95357e+06	2.84983e+06	2815600	3.44977e+06	3.43927e+06	3146800	3.06487e+06	2247200
Lmbn001467	158.08	116.07	159.09	C7H13NO3	[M-H]-	5-Acetamidopentanoic Acid	Organic acids	1072-10-2	C03087	32582.7	54642.7	74017	109769	159517	33314.3	31585.7	29399	39478.7	51288	62509.2
pme2589	159.1	87	160.037	C6H8O5	[M-H]-	2-Oxoadipic acid	Organic acids	3184-35-8	C00322	15168	23357.3	33313.7	19445.7	15188.3	25927.7	25702.3	29615	22990.7	20706.1	28469.8
pme0128	159.08	88	160.085	C6H12N2O3	[M-H]-	L-Alanyl-L-Alanine	Amino acids and derivatives	1948-31-8	--	2554.98	14051	21229	32655.3	52122	9	2972.27	7032.67	7645.47	6608.6	10121.1
mws1550	162.06	73.1	161.051	C6H11NO2S	[M+H]+	S-Allyl-L-cysteine	Amino acids and derivatives	21593-77-1	C16759	34283.7	198787	921653	1.07273e+06	545127	37742	76734.3	217540	349697	358710	407855
pme3382	160.06	98	161.069	C6H11NO4	[M-H]-	N-Acetyl-L-threonine	Amino acids and derivatives	17093-74-2	--	28548.3	43297.3	49749.7	37520.7	39963.7	36438	31382.7	24223	31414	34274.3	36969.2
pme2914	161.05	99	162.053	C6H10O5	[M-H]-	3-Hydroxy-3-methylpentane-1,5-dioic acid	Amino acids and derivatives	503-49-1	C03761	9760300	1.34677e+07	4.92937e+06	3.14357e+06	1373000	5.65173e+06	8172300	9337300	7.30857e+06	3728600	7264125
pme2758	162.04	144	163.048	C5H9NO5	[M-H]-	4-Hydroxy-L-glutamic acid	Amino acids and derivatives	3913-68-6	C03079	7074.17	15557	22318.3	30492	16723.7	5814.33	10134.9	13617.7	11114	26412	14349.5
pme1419	164.07	104	163.067	C6H13NO2S	[M+H]+	L-Methionine methyl ester	Amino acids and derivatives	10332-17-9	--	58866	57909.3	141323	157863	117127	60142.7	61485.3	70224.3	73291.3	97993	153318
Lmbp000123	164.07	56.05	163.067	C6H13NO2S	[M+H]+	L-Homomethionine	Amino acids and derivatives	25148-30-5	C17213	2.08387e+06	2.11303e+06	1897900	2396600	628653	2549200	2.70003e+06	2108400	2.35233e+06	3.08733e+06	2100950
mws1641	165.04	120.02	164.033	C6H4N4O2	[M+H]+	Lumazine	Nucleotides and derivatives	487-21-8	C03212	60459	126557	113997	122510	97882.7	58126	61301.7	69401.3	73610	53520.7	88429
Lmmn001643	163.04	119.05	164.047	C9H8O3	[M-H]-	2-Hydroxycinnamic acid	Organic acids	583-17-5	C01772	239460	81756.7	51767.7	39515.7	31663.3	115533	69615.7	76600.3	54894.7	39410.3	77290.5
mws0854	163	58.8	164.068	C6H12O5	[M-H]-	Rhamnose	Saccharides and Alcohols	3615-41-6	C00507	10181.3	11929.4	15284	23233.7	31870.7	9	21662.3	11280.3	15940.7	24406.3	15463
pme2435	163	59	164.068	C6H12O5	[M-H]-	L-Fucose	Saccharides and Alcohols	2438-80-4	C01019	18666.7	30895	40834.3	31096.7	42148.3	46979.7	22926.3	27151.7	34190.7	44207.3	32220.8
pme2529	163.2	101	164.068	C6H12O5	[M-H]-	1,5-Anhydro-D-glucitol	Saccharides and Alcohols	154-58-5	C07326	99598	86848	97129	136857	121017	291090	98704	84067.7	113853	124823	130122
pme2617	166.05	102	165.046	C5H11NO3S	[M+H]+	L-Methionine Sulfoxide	Amino acids and derivatives	3226-65-1	C02989	2.80043e+06	3.09073e+06	3192400	3103100	2.89367e+06	2697100	2.61253e+06	2611100	2.61247e+06	2828600	2813950
pme0021	166.09	120.08	165.07	C9H11NO2	[M+H]+	L-Phenylalanine	Amino acids and derivatives	63-91-2	C00079	423790	850353	793250	835727	736223	399897	467687	512973	547773	408697	618668
pme0282	165.02	77.04	166.027	C8H6O4	[M-H]-	Phthalic acid	Organic acids	88-99-3	C01606	174157	181590	170583	141673	134497	588380	443050	320887	276713	263673	276882
pmc0274	167.1	121.1	166.031	C6H6N4S	[M+H]+	6-Methylmercaptopurine	Nucleotides and derivatives	50-66-8	C16614	2.13387e+07	38648000	3.66693e+07	3.87223e+07	3.41423e+07	2.01753e+07	22625000	2.50313e+07	2.60377e+07	1.99713e+07	29815000
mws0344	165.04	75	166.048	C5H10O6	[M-H]-	D-Xylonic acid	Organic acids	526-91-0	C00502	149907	503040	1.63827e+06	3.15133e+06	5.13193e+06	449700	412393	421540	575253	1.26827e+06	916740
Zmjp000624	168.06	150.05	167.058	C8H9NO3	[M+H]+	Pyridoxal	Vitamin	66-72-8	C00250	11180.4	19605	31212	23904.7	16131	6541.63	9056	8716.63	13064.7	13546.6	8593.2
mws2125	166.98	78.7	167.982	C3H5O6P	[M-H]-	Phosphoenolpyruvate	Organic acids	138-08-9	C00074	171727	169927	50207.3	41762.3	34849.7	368047	516450	615633	677190	339613	338478
pme1383	170.08	134.1	169.074	C8H11NO3	[M+H]+	Pyridoxine	Vitamin	65-23-6	C00314	1.34403e+06	2.29937e+06	5.43363e+06	4.49357e+06	5777800	1.55177e+06	1.34847e+06	1.16193e+06	2043500	3.56227e+06	2406575
pme0181	170.09	124	169.085	C7H11N3O2	[M+H]+	3-Methyl-L-Histidine	Amino acids and derivatives	368-16-1	C01152	59999.3	63967.7	65968	71414	69428	67103	57745.3	60427.3	58973.7	66233	59936.8
pme3186	169	79	169.998	C3H7O6P	[M-H]-	DL-Glyceraldehyde-3-phosphate	Organic acids	591-59-3	C00661	89282.7	154677	98143.7	60972.3	100031	156937	121681	149940	84730	110798	123592
Zmzn000078	168.99	78.96	169.998	C3H7O6P	[M-H]-	Dihydroxyacetone phosphate	Saccharides and Alcohols	57-04-5	C00111	588933	669870	490837	354720	234500	1.03963e+06	765743	769197	516820	638560	620812
Xmbp001692	171.03	81.03	170.022	C7H6O5	[M+H]+	2,4,6-Trihydroxybenzoic acid	Organic acids	83-30-7	--	9	9	9	9	9	65188.7	30455	31668.3	17757.7	17290	21002
ML10176345	171.03	109.03	172.037	C7H8O5	[M-H]-	3-Dehydroshikimic acid	Organic acids	2922-42-1	C02637	64146.3	24242	9	9	9	257710	46820.7	44947	16579.7	8950.83	38184.2
Lmbn003524	171.1	99.08	172.11	C9H16O3	[M-H]-	9-Oxononanoic acid	Organic acids	2553-17-5	C16322	13947	10411.2	10416.1	10031.8	9633.5	11026.3	13913.1	12051.7	12036.3	12139.1	6734.5
pme0253	174.11	86	173.105	C8H15NO3	[M+H]+	N-Acetyl-L-leucine	Amino acids and derivatives	1188-21-2	C02710	10436.3	12201.3	22860	33728	92101	5966.87	9	9	9	9	22467.8
MA10039492	173.01	71.03	174.016	C6H6O6	[M-H]-	Dehydroascorbic acid	Vitamin	490-83-5	C05422	503953	351143	98083	143130	66868.3	1363600	465463	452383	202980	114192	569495
mws0154	173.05	93	174.053	C7H10O5	[M-H]-	Shikimic acid	Organic acids	138-59-0	C00493	5777500	4.41403e+06	1238670	1487190	522183	1.50353e+07	5525700	5.05833e+06	2236900	1.50063e+06	6203825
mws0242	173.08	111	174.089	C8H14O4	[M-H]-	Suberic Acid	Organic acids	505-48-6	C08278	8185.03	13356	7394.57	8293.6	17441.3	12254.1	11854.5	11304.5	24171	16916	10190
Zmyn000155	173.11	131.08	174.1	C7H14N2O3	[M-H]-	N-α-Acetyl-L-ornithine	Amino acids and derivatives	6205-08-9	C00437	408813	551443	516323	964220	463077	245807	390737	664913	402873	325873	448992
mws0260	175.12	116	174.112	C6H14N4O2	[M+H]+	L-Arginine	Amino acids and derivatives	74-79-3	C00062	5896500	4.96913e+06	4.08127e+06	5.83117e+06	2.93293e+06	3688700	5.11853e+06	6.56633e+06	4.07993e+06	2799100	4597800
pme2559	174.04	88	175.048	C6H9NO5	[M-H]-	N-Acetyl-L-Aspartic Acid	Amino acids and derivatives	997-55-7	C01042	36217	78246.3	130277	187727	195807	101829	83628.7	66451.3	109392	135537	103112
pme0008	176.1	113	175.096	C6H13N3O3	[M+H]+	L-Citrulline	Amino acids and derivatives	372-75-8	C00327	65204.7	57913.3	51899.7	179603	49468	36322	51693.3	84554	70212.7	59185.3	69827
Hmfn000531	175.02	87.01	176.032	C6H8O6	[M-H]-	L-Ascorbic acid (Vitamin C)	Vitamin	50-81-7	C00072	1439900	2963900	5365700	4.63617e+06	3.71177e+06	9.73523e+06	4.09413e+06	5.43287e+06	3.34563e+06	2387500	3121050
mws4175	175.02	85.03	176.032	C6H8O6	[M-H]-	D-Glucurono-6,3-lactone	Saccharides and Alcohols	32449-92-6	C02670	10018	35372.7	91500.3	124025	141640	70807.7	28057	27250.3	37963	27314.3	32262.5
Zmgn001448	175.06	115.04	176.068	C7H12O5	[M-H]-	2-Propylmalic Acid*	Organic acids	-	C05994	47093	14529	6156	7217.87	9	269757	46674	72827.3	22146	19489.3	45717
pmb3101	175.06	115	176.068	C7H12O5	[M-H]-	2-Isopropylmalic Acid*	Organic acids	49601-06-1	C02504	49911	16482.3	7808.13	11016.9	6751.37	284243	54640.7	69311.7	24149.7	19948	50058.5
Lmbp001216	178.09	84.08	177.082	C7H15NO2S	[M+H]+	L-Dihomomethionine	Amino acids and derivatives	34022-36-1	C17217	9737.27	9951.33	8051.73	20927.3	11968.7	5843.93	9220.57	10919.8	11427	10922.1	12702.2
mws0875	179.05	76	178.041	C5H10N2O3S	[M+H]+	L-Cysteinyl-L-glycine	Amino acids and derivatives	19246-18-5	C01419	59688.3	37112.3	20971	13749	9	154767	133483	119127	87812	64483	43750
pme2253	177.04	59	178.048	C6H10O6	[M-H]-	L-Gulono-1,4-Lactone*	Saccharides and Alcohols	1128-23-0	C01040	22690.3	15791	20283.7	22446.5	32846	15671.3	24463.7	24604.7	30767	20394	23470.2
pme1021	177.14	99	178.048	C6H10O6	[M-H]-	D-Glucono-1,5-lactone*	Saccharides and Alcohols	90-80-2	C00198	55642.3	65185	60813.7	47330	88122.3	43634.3	79841	54102	78216.3	81058	91583.5
pmb0786	180.09	163.06	179.079	C6H13NO5	[M+H]+	D-Glucosamine	Saccharides and Alcohols	3416-24-8	C00329	810403	720487	762313	749793	1007700	1040130	1.39227e+06	1.21183e+06	1.31467e+06	1634900	1146800
mws1164	179.06	59.01	180.063	C6H12O6	[M-H]-	D-Fructose*	Saccharides and Alcohols	7660-25-5	C05003	1.13953e+07	1.70077e+07	1.97993e+07	1.95503e+07	2.67643e+07	1.0828e+07	1.65673e+07	18016000	2.10643e+07	2.25207e+07	18553250
Hmln000297	179.05	59.01	180.063	C6H12O6	[M-H]-	Inositol*	Saccharides and Alcohols	87-89-8	C00137	11111000	1.55867e+07	1.73427e+07	1.68973e+07	2.34023e+07	9993600	13994000	1.61767e+07	17458000	1.93163e+07	16517500
mws4170	179.06	59.01	180.063	C6H12O6	[M-H]-	D-Glucose*	Saccharides and Alcohols	14431-43-7	C00031	1.25027e+07	1.68337e+07	1.92807e+07	2.06807e+07	2.75327e+07	1.02088e+07	1.56423e+07	17642000	2.06673e+07	2.23087e+07	18615500
pmf0139	179.06	59	180.063	C6H12O6	[M-H]-	D-Galactose*	Saccharides and Alcohols	59-23-4	C00124	8176300	1.0872e+07	1.38697e+07	12842000	1.64697e+07	8.13733e+06	10685700	1.28003e+07	13751000	1.51317e+07	11574500
pmf0138	179.06	59	180.063	C6H12O6	[M-H]-	D-Mannose*	Saccharides and Alcohols	3458-28-4	C00159	12919000	18302000	2.20703e+07	2.06917e+07	27682000	12326000	1.70703e+07	1.91193e+07	22342000	2.39487e+07	19485500
mws0250	182.08	136.1	181.074	C9H11NO3	[M+H]+	L-Tyrosine	Amino acids and derivatives	60-18-4	C00082	8.33407e+06	2.43973e+07	1.75637e+07	2.88787e+07	2.13383e+07	22444000	2.13693e+07	14986000	2.15093e+07	1.94407e+07	21097500
pme2237	181.07	101	182.079	C6H14O6	[M-H]-	Dulcitol*	Saccharides and Alcohols	608-66-2	C01697	16806	14964.3	31006.3	30673.7	78785.7	25828.7	16042	21552.7	16314	13430.7	23815
mws0214	181.07	71	182.079	C6H14O6	[M-H]-	D-Sorbitol*	Saccharides and Alcohols	50-70-4	C00794	41521	57125	80128.3	70871.3	145917	44844	65815	63707.7	76967.3	80334	66213.8
pme2596	184.06	148	183.053	C8H9NO4	[M+H]+	4-Pyridoxic acid	Vitamin	82-82-6	C00847	11999.4	13478.3	18835	14902.7	16521	31535.7	26014.7	21931	29087.7	33166.7	20979.2
Zmgn000447	184.98	78.96	185.993	C3H7O7P	[M-H]-	3-Phospho-D-glyceric acid	Saccharides and Alcohols	820-11-1	C00197	133787	199333	205230	138880	162103	349523	356557	395270	453680	361450	272268
mws0752	185.15	185.16	186.162	C11H22O2	[M-H]-	Undecylic Acid	Lipids	112-37-8	C17715	218790	212730	205073	225240	299507	318697	329393	319123	354477	351647	161658
pme0137	187.07	125	188.08	C7H12N2O4	[M-H]-	N-Acetyl-L-Glutamine	Amino acids and derivatives	2490-97-3	--	696397	669313	613433	534263	452347	2130100	1.64563e+06	785903	623790	741923	844322
mws0237	187.1	125	188.105	C9H16O4	[M-H]-	Azelaic acid	Organic acids	123-99-9	C08261	467783	483457	491747	467203	647580	585827	609273	502757	566570	581060	481898
pme0122	189.12	126	188.116	C8H16N2O3	[M+H]+	N6-Acetyl-L-lysine	Amino acids and derivatives	692-04-6	C02727	2.54643e+06	3532900	2555000	1911500	1.29843e+06	2.52567e+06	2.64153e+06	2.29777e+06	2726300	2.20333e+06	2801125
mws0736	189.12	86	188.116	C8H16N2O3	[M+H]+	N-Glycyl-L-leucine*	Amino acids and derivatives	869-19-2	C02155	48313	42793.7	51365.7	46870.7	95800	52753.7	45166	34455	27440.7	37033.3	46264.8
mws5041	189.12	86.1	188.116	C8H16N2O3	[M+H]+	L-Glycyl-L-isoleucine*	Amino acids and derivatives	19461-38-2	--	180250	172843	136423	97108.3	93541.3	345623	257420	233040	137840	153533	182480
Zmjp000182	189.13	70.07	188.127	C7H16N4O2	[M+H]+	N-Monomethyl-L-arginine	Amino acids and derivatives	17035-90-4	C03884	305377	482663	358183	615770	279800	270050	461810	495977	521150	418007	390975
pme3388	189.13	144	188.127	C7H16N4O2	[M+H]+	Homoarginine	Amino acids and derivatives	156-86-5	C01924	31675.7	63801.3	61841.7	102909	50426.7	46757	81563.3	77964	78130	61597	71791.8
pmf0348	187.13	97	188.141	C10H20O3	[M-H]-	2,6-Dimethyl-7-octene-2,3,6-triol	Saccharides and Alcohols	73815-21-1	--	40627.7	42428	42662.3	47515.3	59093.7	60922	55714.3	48281	50460.7	49511.7	42897.5
pme0075	188.06	128	189.064	C7H11NO5	[M-H]-	N-Acetyl-L-glutamic acid	Amino acids and derivatives	1188-37-0	C00624	26347.7	38967.3	58626	113627	90802.3	45463.7	48227.7	39100	66912	61228	48139.5
mws0193	190.12	127	189.111	C7H15N3O3	[M+H]+	L-Homocitrulline	Amino acids and derivatives	1190-49-4	C02427	376017	493850	513910	409713	357500	389133	393730	386673	438033	441027	413338
pme0278	191.1	128	190.095	C7H14N2O4	[M+H]+	2,6-Diaminooimelic acid	Amino acids and derivatives	583-93-7	C00666	58833.7	227107	260417	877370	2.20743e+06	53305.7	133640	121353	392480	942590	481005
Zmyn000453	191.02	111.01	192.027	C6H8O7	[M-H]-	Isocitric Acid*	Organic acids	320-77-4	C00311	1.48173e+07	1.38187e+07	5.95873e+06	4.18597e+06	2.44373e+06	1.88967e+07	20013000	2.15873e+07	1.89903e+07	1.69283e+07	16133750
mws0281	191.02	111.01	192.027	C6H8O7	[M-H]-	Citric Acid*	Organic acids	77-92-9	C00158	6.35097e+06	7.01133e+06	7.46817e+06	7.07103e+06	5105100	1.02032e+07	9.91913e+06	9.67027e+06	1.08497e+07	1.11557e+07	7318675
mws0277	191.06	85	192.063	C7H12O6	[M-H]-	Quinic Acid	Organic acids	77-95-2	C00296	811067	689413	298727	228257	132517	957357	1.13083e+06	1.18673e+06	958207	885230	870728
pme2743	194.08	91	193.074	C10H11NO3	[M+H]+	N-Phenylacetylglycine	Amino acids and derivatives	500-98-1	C05598	17033.7	33019.7	14711	18554.7	6301.97	6945.4	22986.3	30089.3	19664	15194.3	17167.8
mws1189	193.04	72.8	194.033	C6H10O7	[M-H]-	D-Galacturonic acid*	Organic acids	685-73-4	C00333	118587	142917	216090	250297	303060	228987	160077	156143	225740	266780	159638
pme3705	193.04	73	194.043	C6H10O7	[M-H]-	D-Glucoronic acid*	Saccharides and Alcohols	6556-12-3	C00191	133017	141103	202550	258647	294190	214667	177730	147413	208700	264643	183472
mws2104	193.07	99.01	194.079	C7H14O6	[M-H]-	D-Pinitol	Saccharides and Alcohols	10284-63-6	C03844	27684.7	12534.7	11253.6	11008	14248	55850.7	16135.3	17491	14407.4	22022.7	16350.5
Lmrj002244	195.11	70.06	194.106	C10H14N2O2	[M+H]+	Cyclo(Pro-Pro)	Amino acids and derivatives	6708-06-1	--	9	9	1995.47	9	9	6454.87	5151.07	4978.77	2167.93	4539.3	3543.68
pme0534	195.05	74.9	196.058	C6H12O7	[M-H]-	Gluconic acid	Saccharides and Alcohols	526-95-4	C00257	73640.3	243940	567830	740060	863257	190597	122640	156950	263753	395070	285432
Zmzn000079	199	78.96	200.009	C4H9O7P	[M-H]-	D-Erythrose-4-phosphate	Saccharides and Alcohols	585-18-2	C00279	58100	79592.3	102413	92067.7	62758.7	177643	65539.3	88699.7	53561	70922.7	79403
pmb2640	199.17	199.17	200.178	C12H24O2	[M-H]-	Dodecanoic acid (Lauric acid)	Lipids	143-07-7	C02679	18997.3	15855.7	17048	20347.7	15890.3	29351.7	34076.7	20124.3	24719	17127	16874
mws5037	203.14	86.1	202.132	C9H18N2O3	[M+H]+	L-Alanyl-L-leucine	Amino acids and derivatives	3303-34-2	--	64865.3	43599	31667	21082.7	15548.3	194183	152120	144263	65924.3	67803.3	80368
NK10251888	203.15	70.07	202.143	C8H18N4O2	[M+H]+	NG,NG-Dimethyl-L-arginine	Amino acids and derivatives	30315-93-6	C03626	40562.7	58839	81123	96345	131833	48432.3	52363.7	52459.3	67859.7	94769	73704.8
pme2060	204.25	136	203.117	C10H13N5	[M+H]+	N6-Isopentenyladenine	Nucleotides and derivatives	2365-40-4	C04083	1568.23	9460.17	31070.3	21019	23729.7	5862.57	3406.57	17133.6	2094.53	6406.73	10522.9
mws0282	203.08	116.05	204.09	C11H12N2O2	[M-H]-	L-Tryptophan	Amino acids and derivatives	73-22-3	C00078	687920	2.19373e+06	2.29827e+06	2.43743e+06	3.37687e+06	1.93373e+06	2.04307e+06	1.85243e+06	2.16667e+06	1.52807e+06	1890150
pme1261	206.14	76	205.131	C9H19NO4	[M+H]+	D-Panthenol	Saccharides and Alcohols	81-13-0	C05944	2947.53	1652.9	9	1808.67	17566.2	3860.1	8886.27	3952.03	3380.97	9275.13	6252.5
Zmgn002106	206.08	58.03	207.09	C11H13NO3	[M-H]-	N-Acetyl-L-phenylalanine	Amino acids and derivatives	2018-61-3	C03519	10291.7	18827.7	13310.3	11569.7	10237.9	4982.47	3138.27	3135.63	2425.83	9	6865.52
Zmyn000108	209.03	85.03	210.038	C6H10O8	[M-H]-	D-Saccharic acid*	Saccharides and Alcohols	87-73-0	C00818	15558.3	36929.7	26985.7	33517.3	27963.3	95093.7	47489.7	48530.3	32664	40702.3	36936
Zmpn000199	209.03	85.03	210.038	C6H10O8	[M-H]-	D-Galactaric acid*	Saccharides and Alcohols	526-99-8	C00879	25850.7	76730	239933	300547	598717	117457	89927	94803.3	81190.7	197413	157112
pme1654	209.12	59.02	210.126	C12H18O3	[M-H]-	Jasmonic acid	Organic acids	77026-92-7	C08491	41784	18979.3	6223.77	9	4494.97	97671.7	18496	19807.3	6576.7	4565.2	23284.8
pme0109	212.09	166	211.084	C10H13NO4	[M+H]+	Methyldopa	Amino acids and derivatives	555-30-6	C07194	253083	236707	202500	172283	186157	469067	338970	320460	287820	245740	259380
pme0170	217.13	158	216.122	C8H16N4O3	[M+H]+	N-Acetyl-L-Arginine	Amino acids and derivatives	155-84-0	--	13017.3	15587	12315.3	20690.7	11416	11194.7	10083.2	8430.9	12845.3	5724.13	14369.5
pme2566	217.08	199	218.09	C8H14N2O5	[M-H]-	5-L-Glutamyl-L-amino acid	Amino acids and derivatives	5875-41-2	--	10506.3	18369	23288	16922.7	27654	24426	11697	9208.03	10307.7	19188.7	16879.8
Lmrj001698	219.13	60.04	218.127	C9H18N2O4	[M+H]+	L-Seryl-L-Isoleucine	Amino acids and derivatives	91086-51-0	--	23352	49536.3	58176.7	53707.7	85768	31832.3	25456.7	24685	20818.7	32095.3	41782
mws1337	220.12	202.1	219.111	C9H17NO5	[M+H]+	D-Pantothenic Acid	Vitamin	79-83-4	C00864	8970.37	21235.7	15300.2	16952.3	6875.47	23334.3	35225.7	18671.3	26231.3	132883	33240.5
pme1228	221.09	204	220.085	C11H12N2O3	[M+H]+	5-Hydroxy-L-tryptophan	Amino acids and derivatives	56-69-9	C00643	9	9	9	9	9	17761	22033	12632.7	16419.7	19985.3	10800.2
mws2608	222.1	84.05	221.09	C8H15NO6	[M+H]+	N-Acetyl-D-galactosamine*	Saccharides and Alcohols	1811-31-0	C01132	154123	87264.3	110550	98025	187830	124583	104546	97284.7	104860	130363	130650
pme2755	222	144	221.09	C8H15NO6	[M+H]+	N-Acetyl-D-glucosamine*	Saccharides and Alcohols	7512-17-6	C00140	390683	422470	397090	376743	408157	414343	397687	351563	352393	383573	368642
mws4174	222.1	138	221.09	C8H15NO6	[M+H]+	N-Acetyl-D-mannosamine*	Saccharides and Alcohols	7772-94-3	C00645	121440	71846	77000.3	65045	216373	170700	94782.7	79794.3	86496.7	123947	118690
mws5042	223.11	120.09	222.1	C11H14N2O3	[M+H]+	L-Glycyl-L-phenylalanine	Amino acids and derivatives	721-66-4	--	71447.7	85369.7	74580.7	60750.7	78575	116930	82759	75167.3	50808	42981.3	73539
mws0520	224.09	136	223.084	C11H13NO4	[M+H]+	N-Acetyl-L-tyrosine	Amino acids and derivatives	537-55-3	--	10636.6	20889.7	17299.7	72447	49023	17162.3	11645.3	14722	22579.3	21446.7	26060.2
pme1194	228.1	112	227.091	C9H13N3O4	[M+H]+	2'-Deoxycytidine	Nucleotides and derivatives	951-77-9	C00881	363997	302987	293870	166747	150470	1.64667e+06	938723	891677	780977	755880	592415
mws0119	227.2	227.2	228.209	C14H28O2	[M-H]-	Myristic Acid	Lipids	544-63-8	C06424	2.09437e+06	1.65337e+06	1.79123e+06	1.81267e+06	2.14133e+06	3.16313e+06	3.12793e+06	2.04027e+06	2.39453e+06	1766400	2968350
pma6455	229.01	96.97	230.02	C5H11O8P	[M-H]-	Ribulose-5-phosphate	Saccharides and Alcohols	4300-28-1	C00117	14821	16312.2	7425	23097.3	19012.3	38647.7	13781	17897.7	18388.7	31852.3	36404.8
Lmhp001670	231.16	72.08	231.17	C11H22N2O3	[M+H]+	L-Valyl-L-Leucine	Amino acids and derivatives	3989-97-7	--	57616	134130	189660	125613	166743	71668.3	65413.7	67797.7	65881	125140	106105
Hmlp001371	235.11	120.08	234.1	C12H14N2O3	[M+H]+	Cyclo(Tyr-Ala)	Amino acids and derivatives	21754-26-7	--	7983.97	3359.3	9	9	9	4467.7	5276.53	3273.7	2711.47	3337.37	3559.6
pmb0962	235.1	118.3	234.158	C10H22N2O4	[M+H]+	L-Lysine-Butanoic Acid	Amino acids and derivatives	80407-71-2	--	24471.2	9380.47	4085.13	4653.23	7082.33	24267.7	15643.5	10511.2	12571.6	11639.8	12468.6
mws4176	237.12	120.09	236.116	C12H16N2O3	[M+H]+	L-Alanyl-L-Phenylalanine	Amino acids and derivatives	3061-90-3	--	18171	39262.7	54370	45259.3	45463	19257	23121.7	25270	20161	25336.7	32058.2
mws0984	236.08	164.06	237.086	C9H11N5O3	[M-H]-	L-Sepiapterin	Nucleotides and derivatives	17094-01-8	C00835	2627.37	3447.93	4498.03	4991.43	5836.13	3378.47	2595.23	5062.03	2764.13	2721.07	4318.32
pme2827	239	223	240.245	C16H32O	[M-H]-	Palmitaldehyde	Lipids	629-80-1	C00517	4.59487e+06	5.26283e+06	5.58287e+06	5692400	5.50727e+06	4.25527e+06	4.16363e+06	4.01943e+06	4.23903e+06	4.46773e+06	6205025
HJAP106	242.1	136.06	241.096	C12H11N5O	[M+H]+	N6-(4-hydroxybenzyl)adnine riboside	Nucleotides and derivatives	-	--	16006	12132.7	3987.13	2237.23	9	7643.03	9890.47	11055.5	13409.3	8413.9	7963.52
pme0264	243.1	127	242.09	C10H14N2O5	[M+H]+	Thymidine	Nucleotides and derivatives	50-89-5	C00214	124733	172560	300230	222707	196310	112077	207743	231453	444667	317203	232300
mws0359	241.22	241.22	242.225	C15H30O2	[M-H]-	Pentadecanoic Acid	Lipids	1002-84-2	C16537	20191.3	12316	18667.7	19337.7	28434.3	23196.3	28346.3	15764.3	24570	15694.3	24822.5
ML10180524	244.09	112.05	243.086	C9H13N3O5	[M+H]+	Cytarabine	Nucleotides and derivatives	147-94-4	C02961	2.21623e+06	2.04517e+06	3133700	2198800	2909500	2.63207e+06	2741500	2.68703e+06	4596700	4.67637e+06	2630325
pme3732	244.09	112	243.086	C9H13N3O5	[M+H]+	Cytidine	Nucleotides and derivatives	65-46-3	C00475	10668600	7.40133e+06	8687600	5.58633e+06	8449700	10048400	1.23363e+07	9.91207e+06	16620000	1.90337e+07	10168000
mws0248	243.06	110	244.07	C9H12N2O6	[M-H]-	Uridine	Nucleotides and derivatives	58-96-8	C00299	21228.3	74546	135573	106299	185317	105554	114406	84087	127003	147653	83495.8
mws0976	243.06	153	244.07	C9H12N2O6	[M-H]-	β-Pseudouridine	Nucleotides and derivatives	1445-07-4	C02067	28569.7	33102.7	43324.7	25371.3	64625.3	98264.7	59938.3	37761.7	38621	59703.7	43665.8
pme2266	245.1	227	244.088	C10H16N2O3S	[M+H]+	Biotin	Vitamin	58-85-5	C00120	9	9	9	4793.47	3926.47	6216.87	12278.9	16105	17533.7	13396.2	9947.4
Lmhp002031	245.18	86.1	245.186	C12H24N2O3	[M+H]+	L-Leucyl-L-Leucine	Amino acids and derivatives	3303-31-9	--	56445.7	128393	128003	106760	120617	79865.7	89728.7	93133.3	68704.7	99321.7	95007.5
pmb2591	245.09	203.2	246.1	C13H14N2O3	[M-H]-	N-Acetyl-L-Tryptophan	Amino acids and derivatives	1218-34-4	--	3196.73	12973.8	13552.2	8221.33	5969.6	8649.37	9528.5	8653.9	8742.13	6312.53	7235.55
mws0124	247.11	130	246.1	C13H14N2O3	[M+H]+	N-(3-Indolylacetyl)-L-alanine	Amino acids and derivatives	57105-39-2	--	2561.73	6293.93	6424.23	4972.37	2542	3314.6	4609.5	4542.7	2714.67	2810.47	3692.45
Lmrj002087	247.13	86.09	246.121	C10H18N2O5	[M+H]+	L-Isoleucyl-L-Aspartate	Amino acids and derivatives	-	--	17164.7	30897	24437.3	14111	13460	31411	25956.7	27932	25558.3	26250.7	24909.8
pme2563	249.06	128	250.062	C8H14N2O5S	[M-H]-	γ-Glu-Cys	Amino acids and derivatives	636-58-8	C00669	9609.33	11844.6	6298.63	5181.67	6289.63	23300	15871.3	8829.93	28263	6865.67	12406
pme3961	252.11	136	251.102	C10H13N5O3	[M+H]+	2'-Deoxyadenosine	Nucleotides and derivatives	958-09-8	C00559	7949.07	24566	7259.73	9384.57	5012.8	27132.3	51322.7	56129	76187	25573	27734.5
mws0361	253.22	235.19	254.225	C16H30O2	[M-H]-	Palmitoleic Acid	Lipids	373-49-9	C08362	3397.17	1841.13	3560.13	3428.1	4799.07	3281.67	5252.13	2090.33	2916.77	1993.7	2618.97
Lmcn009122	253.22	235.21	254.225	C16H30O2	[M-H]-	(7Z)-Hexadecenoic acid	Lipids	2416-19-5	--	1337.2	717.977	1164.48	1037.03	1329.77	1527.07	2253.5	1553.43	1740.33	1171.21	1568.75
pma3101	256.2	124.1	256.082	C11H14NO6+	[M+H]+	Nicotinate D-ribonucleoside	Vitamin	17720-18-2	C05841	238877	398773	1.06443e+06	1006300	1.37087e+06	414417	550233	535040	1.13766e+06	1163600	795895
Zmyn000110	258.04	78.96	259.046	C6H14NO8P	[M-H]-	D-Glucosamine 1-phosphate	Saccharides and Alcohols	2152-75-2	C06156	32069.7	36603	38805.7	31550.7	25298	41690.7	32356.3	42276	38749.7	40598.3	35858
mws1090	259.02	97	260.03	C6H13O9P	[M-H]-	Glucose-1-phosphate*	Saccharides and Alcohols	59-56-3	C00103	4.87397e+06	7.15193e+06	7669700	8.82293e+06	5.37383e+06	10266000	5.71993e+06	7.32873e+06	4.33967e+06	4.70853e+06	6492525
pme3313	259	97	260.03	C6H13O9P	[M-H]-	D-Fructose 6-phosphate*	Saccharides and Alcohols	643-13-0	C00085	1.94023e+06	2937400	2.99753e+06	3876600	2206100	4695700	2485100	3.33143e+06	1.94473e+06	2.20737e+06	2779900
mws0866	259.02	97	260.03	C6H13O9P	[M-H]-	D-Glucose 6-phosphate*	Saccharides and Alcohols	56-73-5	C00092	4.85887e+06	7.02507e+06	7310600	7.95307e+06	5.36833e+06	9.77413e+06	5.63167e+06	7.81577e+06	4.60197e+06	5104300	6750400
Zmpn000095	261.04	78.96	262.045	C6H15O9P	[M-H]-	Sorbitol-6-phosphate	Saccharides and Alcohols	20479-58-7	C01096	24139	37954	44087.7	45017.7	36905	54541	34750.7	39613.7	29058.7	33188.7	36754.5
Lmhp001732	263.13	70.07	263.139	C14H18N2O3	[M+H]+	L-Prolyl-L-Phenylalanine	Amino acids and derivatives	13589-02-1	--	13665.7	13927	9945.4	12901.7	10192.1	15552	14978	13054.7	8385.17	8170.5	14323.5
Lmtn004049	263.13	204.12	264.136	C15H20O4	[M-H]-	Abscisic acid	Organic acids	21293-29-8	C06082	1738100	1614000	1.10403e+06	974317	393040	1114600	1785100	1805600	2.14023e+06	2.31067e+06	1470250
Lmhp002001	265.15	72.08	264.147	C14H20N2O3	[M+H]+	L-Valyl-L-Phenylalanine	Amino acids and derivatives	3918-92-1	--	39293.3	102010	140787	122153	99250.7	47217.7	52556.7	58517.3	59437.7	102815	85073.8
Hmsn000210	133.01	115.01	266.224	C17H30O2	[M-H]-	Methyl 7,10-hexadecadienoate	Lipids	-	--	2.35913e+07	1.96633e+07	16037000	1.39753e+07	9850000	23359000	25520000	2.42507e+07	23345000	2.20257e+07	22650250
pme0230	268.1	136.06	267.097	C10H13N5O4	[M+H]+	Adenosine	Nucleotides and derivatives	58-61-7	C00212	3634100	2663100	1491500	1.32127e+06	3.35207e+06	5.07023e+06	5899700	6.03823e+06	3932700	2.17317e+06	3798125
pme1184	268.1	152	267.097	C10H13N5O4	[M+H]+	2'-Deoxyguanosine	Nucleotides and derivatives	961-07-9	C00330	32076.7	334650	260827	319017	248693	213830	528367	393700	627490	436243	346452
pme2890	269.06	136	268.055	C8H16N2O4S2	[M+H]+	L-Homocystine	Amino acids and derivatives	626-72-2	C01817	277007	20290.7	11155.1	8149.5	12638.3	137503	109057	77442	32409	16572.3	54960
pme1119	269.09	137	268.081	C10H12N4O5	[M+H]+	Inosine	Nucleotides and derivatives	58-63-9	C00294	35185.3	27561.3	16519.3	48299.7	27149	82573.3	47636.7	89798.7	114093	54471.3	34119.8
mws1060	267.07	135	268.081	C10H12N4O5	[M-H]-	9-(Arabinosyl)hypoxanthine	Nucleotides and derivatives	7013-16-3	--	10846.8	42297.7	60400.7	158903	104163	104279	58183.3	125050	181070	115323	90383.8
mws0383	267.23	267.23	268.24	C17H32O2	[M-H]-	10-Heptadecenoic Acid	Lipids	29743-97-3	--	25769	20701	23323.3	25117.3	42684.7	29319.7	37901	24570.3	20981	17362.7	26631.2
Lmmn003323	271.23	225.22	272.235	C16H32O3	[M-H]-	2-Hydroxyhexadecanoic acid	Organic acids	764-67-0	--	62024	38402.3	49327	42153.7	58633.7	94621.7	84057	40369.3	53783	44789.3	57919.8
pmb1452	275.1	213.2	273.267	C16H35NO2	[M+H]+	N-Lauryldiethanolamine	Lipids	1541-67-9	--	11024.2	9860.37	7738.13	8993.53	6719.33	5567.4	7038.97	6805.33	6182.7	6458.77	7355.67
Lmrj002793	277.12	120.08	276.112	C14H16N2O4	[M+H]+	Cyclo(Phe-Glu)	Amino acids and derivatives	-	--	8024.17	6547.4	2940.37	4026.43	8282.43	6716.03	13767.7	6205.8	12328.1	27977.7	7641.85
pme1712	275	257	276.132	C11H20N2O6	[M-H]-	L-Saccharopine	Amino acids and derivatives	997-68-2	C00449	20090.7	39098	64774	61653	63843.7	27452.3	16543.8	28006.7	14339.3	20281.7	27932.2
mws5035	279.17	120.08	278.163	C15H22N2O3	[M+H]+	L-Leucyl-L-phenylalanine	Amino acids and derivatives	56217-82-4	--	93084.7	186443	212420	134970	112213	121473	138943	136333	90189	160680	157738
pmb0889	279.23	95.1	278.225	C18H30O2	[M+H]+	Punicic acid (9Z,11E,13Z-octadecatrienoic acid)	Lipids	544-72-9	C08364	171957	237077	210843	216550	264050	278443	230790	215020	174470	207527	224640
mws0367	277.22	277.22	278.225	C18H30O2	[M-H]-	α-Linolenic Acid*	Lipids	463-40-1	C06427	2.66167e+07	3.82013e+07	4.35277e+07	42292000	44763000	9943600	18743000	2.03663e+07	3.29023e+07	3.64903e+07	27645250
mws0366	277.22	277.22	278.225	C18H30O2	[M-H]-	γ-Linolenic Acid*	Lipids	506-26-3	C06426	29590000	4.11247e+07	4.65803e+07	44904000	4.82897e+07	1.08447e+07	2.08103e+07	2.12937e+07	3.62657e+07	3.99243e+07	30044750
Lmbn005923	277.22	59.01	278.225	C18H30O2	[M-H]-	Crepenynic acid	Lipids	2277-31-8	C07289	40764	66332	78711.7	70725	86320	9793.9	26447.7	27763.3	53200	61589	38434.2
mws0629	281.11	166	280.106	C13H16N2O5	[M+H]+	L-Aspartyl-L-Phenylalanine	Amino acids and derivatives	13433-09-5	--	129237	93961.3	112657	63683.3	62138.3	414150	198100	170820	98468.7	116683	152562
Lmbn006152	279.23	59.01	280.24	C18H32O2	[M-H]-	(9Z,11E)-Octadecadienoic acid	Lipids	2540-56-9	C04056	5690	6126.63	3946.33	5203.77	4265.53	5607.5	5958.8	4997.7	3406.93	4263.5	5419.15
mws1491	279.23	279.23	280.24	C18H32O2	[M-H]-	Linoleic acid	Lipids	60-33-3	C01595	7.60083e+06	9.52613e+06	7339500	7.56167e+06	6.93633e+06	8362300	7.93027e+06	7248600	5.50773e+06	6168600	7947400
Hmhp001812	282.12	136.06	281.112	C11H15N5O4	[M+H]+	2'-O-Methyladenosine	Nucleotides and derivatives	2140-79-6	--	145047	215157	329913	387277	575790	206030	226873	246627	375260	370393	313130
YC512118	282.28	247.24	281.272	C18H35NO	[M+H]+	Oleamide (9-Octadecenamide)	Lipids	301-02-0	C19670	94391	113320	101877	107547	26855	38142.3	20893.3	35591	38372	62273.7	25963.5
Lmyn012331	281.25	281.25	282.256	C18H34O2	[M-H]-	Petroselinic acid	Lipids	593-39-5	C08363	410960	523197	417230	513187	603340	605720	633317	566363	393710	484740	534605
mws0396	281.25	281.25	282.256	C18H34O2	[M-H]-	Elaidic Acid	Lipids	112-79-8	C01712	1.14376e+06	1.36813e+06	1160600	1.49743e+06	1.73173e+06	1.79303e+06	1.78407e+06	1.65607e+06	1.12173e+06	1317300	1547925
mws2623	281.25	281.25	282.256	C18H34O2	[M-H]-	11-Octadecanoic acid(Vaccenic acid)	Lipids	506-17-2	C21944	422323	501800	428600	512787	601087	603547	625503	572647	392680	472060	552630
pme1178	284.1	152	283.092	C10H13N5O5	[M+H]+	Guanosine	Nucleotides and derivatives	118-00-3	C00387	5388200	2.84123e+07	3.09017e+07	3.42333e+07	2.83263e+07	2.87403e+07	4.09127e+07	3.24643e+07	3.97077e+07	4.38417e+07	32752000
mws0668	283.07	151	284.076	C10H12N4O6	[M-H]-	Xanthosine	Nucleotides and derivatives	146-80-5	C01762	62306.3	182507	246200	244307	240030	1022170	1012980	931957	945597	915970	635620
mws1489	283.26	283.26	284.272	C18H36O2	[M-H]-	Stearic Acid	Lipids	57-11-4	C01530	6922500	5779900	4.61053e+06	6.57387e+06	6.85783e+06	8.94287e+06	9509300	8.43997e+06	9071700	6.15983e+06	1499400
pma1751	286.09	124	285.085	C12H15NO7	[M+H]+	N-(beta-D-Glucosyl)nicotinate	Vitamin	-	--	107237	60865	115107	110610	240720	438910	124847	78682.3	44651	61478	143648
pme2289	287.2	119	286.23	C20H30O	[M+H]+	Retinol (Vitamin A1)	Vitamin	68-26-8	C00473	5288.77	9	9	9	9	32998.7	21164.7	18650	5399.6	5324.97	19202.8
pme3511	287.05	243	288.059	C10H12N2O8	[M-H]-	Orotidine	Vitamin	314-50-1	--	8616.9	9140.57	7761.4	6721.1	6636.27	21233	16166	15860	12150.7	9854.97	12190.8
Lmyn007883	287.22	287.22	288.23	C16H32O4	[M-H]-	9,16-Dihydroxypalmitic acid	Lipids	38076-49-2	--	12432.7	6262.23	4516.33	3186.7	2965.9	24594.3	22070.3	15098	5589.37	5498.23	9956.9
pmb3081	289	97	290.004	C6H11PO11	[M-H]-	Glucarate O-Phosphoric acid	Saccharides and Alcohols	-	--	1.60193e+06	3765700	3358300	3.25213e+06	3.13817e+06	4.15193e+06	2930500	3.51563e+06	3922700	4.49933e+06	4235525
pme3163	289	97	290.04	C7H15O10P	[M-H]-	D-Sedoheptuiose 7-phosphate	Saccharides and Alcohols	2646-35-7	--	1176500	2350400	2149100	2080400	2107400	3365000	1797600	2.26663e+06	2.36363e+06	2791300	2785125
pmb2657	289.1	97.1	290.123	C10H18N4O6	[M-H]-	Argininosuccinic acid	Organic acids	2387-71-5	C03406	8764.77	11793.8	16482.3	20558.3	17311	18105.7	9693.57	12292.8	10191.1	17664.3	11876.5
pmf0314	289.25	157	290.261	C20H34O	[M-H]-	(+)-cis-Abienol	Saccharides and Alcohols	17990-16-8	--	7076.3	6328.57	6788	7093.47	7381.3	6757.23	5845	6817.33	6867	6794.57	6636.23
Zmyn004548	291.2	235.17	292.204	C18H28O3	[M-H]-	12-Oxo-phytodienoic acid	Lipids	85551-10-6	C01226	1420.8	2394.87	5601	4603.73	3973.3	1392.6	1393.53	1406.44	1679.4	2545.5	2651.25
pmb2786	293.21	235.17	294.219	C18H30O3	[M-H]-	9-Hydroxy-10,12,15-octadecatrienoic acid	Lipids	89886-42-0	C16326	1449.3	2169.17	2383.83	2614.17	3679.03	1431.53	1701.97	1410.73	1577.8	1576.83	1985.78
Lmbn005443	293.21	235.17	294.219	C18H30O3	[M-H]-	13-KODE; (9Z,11E)-13-Oxooctadeca-9,11-dienoic acid	Lipids	54739-30-9	C14765	1964.67	2046.47	2405.33	2708.07	3782.07	1868.2	1749.1	1749.63	1899.43	1673.07	2216.07
Lmqp000329	296.07	104.11	295.056	C8H14N3O7P	[M+H]+	5-Aminoimidazole ribonucleotide	Nucleotides and derivatives	25635-88-5	--	1717000	2.06393e+06	892377	570800	246110	6.09343e+06	3388700	4338400	3.17567e+06	2.84893e+06	2429500
Hmqp005411	297.24	81.07	296.234	C18H32O3	[M+H]+	9-Oxo-12Z-Octadecenoic acid	Lipids	112543-32-5	--	33740.7	31366	31181	32703	37703.7	31332.3	33761	29684	31184	31611	31375.8
Hmqp005455	297.24	81.07	296.234	C18H32O3	[M+H]+	15(R)-Hydroxylinoleic Acid	Lipids	177931-23-6	--	15570.3	17167.7	17588.3	19018.3	20094	18469.7	17392.3	17604	16961.7	17691.7	17212
Lmbn005662	295.23	171.1	296.235	C18H32O3	[M-H]-	9(10)-EpOME;(9R,10S)-(12Z)-9,10-Epoxyoctadecenoic acid*	Lipids	16833-56-0	C14825	2871.03	3086.03	3054.33	2750.07	2664.7	2400.03	3139.73	3097.57	2304	2648.47	2541.45
Rfmb091	295.23	195.14	296.235	C18H32O3	[M-H]-	9S-Hydroxy-10E,12Z-octadecadienoic acid	Lipids	15514-85-9	C14767	42670.3	73453	61392	62510.7	64169.7	75133.3	59326.3	59833	43510.3	49572.3	60358
pmb2799	295.23	195.2	296.235	C18H32O3	[M-H]-	12,13-Epoxy-9-Octadecenoic Acid*	Lipids	6799-85-5	C14826	3422.97	4136.07	3979.63	4684.03	3605.13	2948.4	3343.07	3260.8	3413.2	3808.47	3811.75
Lmbn005369	295.23	195.14	296.235	C18H32O3	[M-H]-	13(S)-HODE;13(S)-Hydroxyoctadeca-9Z,11E-dienoic acid	Lipids	10219-69-9	C14762	42451.3	73957.3	60301.7	60076.3	61855	73369	59257.7	58008.3	42642.3	50165.7	58683
pme1474	298.1	136	297.09	C11H15N5O3S	[M+H]+	5'-Deoxy-5'-(methylthio)adenosine	Nucleotides and derivatives	2457-80-9	C00170	7.02887e+06	17494000	21944000	2.22533e+07	1.36777e+07	7.85507e+06	1.09603e+07	9.36823e+06	1.18993e+07	1.52717e+07	14064250
pmb0197	298.1	166.3	297.107	C11H15N5O5	[M+H]+	N7-Methylguanosine	Nucleotides and derivatives	20244-86-4	C20674	6998.1	23786.3	43725.7	54527.3	73105.3	5400.93	8639	7594.27	10907	13308	17658
Zmyn004714	297.24	183.14	298.251	C18H34O3	[M-H]-	Ricinoleic acid	Lipids	141-22-0	C08365	14545.3	9960.4	9822.6	8188.23	7733.53	26990.7	13844	11497.3	8132.47	7405.63	11864.2
pmf0297	297.32	183.1	298.324	C20H42O	[M-H]-	1-Eicosanol	Lipids	629-96-9	--	15856.3	9840.37	9811.33	8287.8	7821.2	27154	15927	11730.3	8653.9	7892.5	12377.8
ML10195036	300.3	60.05	299.282	C18H37NO2	[M+H]+	3-Dehydrosphinganine	Lipids	16105-69-4	C02934	27574.7	22636.3	21902	18218	9635.6	17246.7	19314.7	15010	12440	9147.33	17798.8
mws1375	304.15	185.09	303.143	C12H21N3O6	[M+H]+	Nicotianamine	Amino acids and derivatives	34441-14-0	C05324	459220	298983	345610	432823	331743	395653	350150	257940	283457	385160	378250
pme1373	306.05	110	307.057	C9H14N3O7P	[M-H]-	2'-Deoxycytidine-5'-monophosphate	Nucleotides and derivatives	1032-65-1	C00239	6035.13	18048.3	25761.7	17784	10788.9	22376.7	13155.3	11346.3	18260.7	25349.7	12674.5
pme1086	306.08	143	307.084	C10H17N3O6S	[M-H]-	Glutathione reduced form	Amino acids and derivatives	70-18-8	C00051	244300	1762400	2.89423e+06	2.61137e+06	1.25953e+06	1961400	1486900	1546200	2.15143e+06	2.63493e+06	1469550
pmb2855	307	145	308.122	C11H20N2O8	[M-H]-	L-Glutamine-O-glycoside	Amino acids and derivatives	-	--	53165.3	123053	130648	456673	711823	38671.3	185073	174970	350670	535483	220675
pmn001610	307.26	307.3	308.272	C20H36O2	[M-H]-	Eicosadienoic acid	Lipids	5598-38-9	C16525	42149	32261.7	26330.3	27081.7	23234.7	62653.7	57568.3	56101.3	22555.3	25940.7	41246.8
pmb2857	308.1	146.1	309.106	C11H19NO9	[M-H]-	L-Glutamic acid-O-glycoside	Amino acids and derivatives	-	--	135407	335060	747757	1.24287e+06	527237	53704.3	310967	392367	694713	797790	403302
pmb2791	309.21	209.1	310.1	C18H30O4	[M-H]-	9-Hydroperoxy-10E,12,15Z-octadecatrienoic acid	Lipids	111004-08-1	C16321	37851.7	49011.7	48581	42064.3	20553.7	17114	22802.7	16917.3	17113	14526	7258.25
Lmcp002302	312.13	180.09	311.123	C12H17N5O5	[M+H]+	N6-(2-Hydroxyethyl)adenosine	Nucleotides and derivatives	4338-48-1	--	37955.3	183313	415127	372403	789290	137687	254307	190213	436150	538250	331310
pme3967	312.13	180	311.123	C12H17N5O5	[M+H]+	2-(Dimethylamino)guanosine	Nucleotides and derivatives	2140-67-2	--	45447	204790	475360	409167	886153	152353	289477	212100	481000	586693	362052
mws0636	313.15	166	312.147	C18H20N2O3	[M+H]+	L-Phenylalanyl-L-phenylalanine	Amino acids and derivatives	2577-40-4	--	9579.13	16838	21213.3	14213.7	10079.7	9037.97	9195.97	10217.7	10626.7	12712	13486.2
pmn001689	311.22	223.17	312.23	C18H32O4	[M-H]-	9-Hydroxy-12-oxo-15(Z)-octadecenoic acid	Lipids	-	C21924	21276	22299	21458	22704.3	24948.7	21649.7	23219.7	22178	23609.3	24034.3	22676.2
Lmbn004685	311.22	223.17	312.23	C18H32O4	[M-H]-	5S,8R-DiHODE; (5S,8R,9Z,12Z)-5,8-Dihydroxyoctadeca-9,12-dienoate	Lipids	-	C20186	21259	21121.3	21639	23516.7	23824.3	21198.3	21239.3	22094	22460.7	23489.3	23540.2
pmb2804	311.1	171.3	312.23	C18H32O4	[M-H]-	13S-Hydroperoxy-9Z,11E-octadecadienoic acid	Lipids	33964-75-9	C04717	12024.7	12290.3	13195.3	14233	18307.3	16482.7	15276	14357	16778.3	18807.3	15711
Rfmb087	311.22	293.21	312.23	C18H32O4	[M-H]-	9-Hydroxy-13-oxo-10-octadecenoic Acid	Lipids	-	--	11677	12713.3	12189.7	13687.3	19463.7	11223	10723.7	10345.7	10041.7	10450	12879.8
Lmbn005487	313.24	251.24	314.246	C18H34O4	[M-H]-	12,13-DHOME; (9Z)-12,13-Dihydroxyoctadec-9-enoic acid	Lipids	263399-35-5	C14829	4610.67	4608.2	4815.57	4972.3	6045.07	7920.77	7046.33	6131.97	7024.1	5445.07	5913.05
pmb2221	318.3	60.1	317.293	C18H39NO3	[M+H]+	4-Hydroxysphinganine	Lipids	554-62-1	C12144	3.15263e+07	2.53713e+07	2.97247e+07	2.45293e+07	13708000	11406000	1.34773e+07	10086200	8.70897e+06	8537400	17334000
mws0582	322.11	130	321.099	C11H19N3O6S	[M+H]+	S-(Methyl)glutathione	Amino acids and derivatives	2922-56-7	C11347	2.53113e+06	382183	252630	255997	119620	1034470	2.07717e+06	1788900	1.84693e+06	2.18283e+06	1.18578e+06
pme3174	324.06	112	323.052	C9H14N3O8P	[M+H]+	Cytidine 5'-monophosphate(Cytidylic acid)	Nucleotides and derivatives	63-37-6	C00055	239303	175157	216457	220733	231803	100614	83603.7	80330.3	148313	148767	148538
pme2074	322.4	129.7	323.21	C18H29NO4	[M-H]-	(-)-Jasmonoyl-L-Isoleucine	Organic acids	120330-93-0	C18699	9908.7	9	9	9	9	9947.23	760.45	2304.33	9	9	2724.75
pme3188	323.03	211	324.036	C9H13N2O9P	[M-H]-	Uridine 5'-monophosphate	Nucleotides and derivatives	58-97-9	C00105	114160	184110	508393	619047	666070	53542	51281	65192.3	93581.7	83126.3	149215
Hmqp006023	326.27	309.27	324.266	C20H36O3	[M+H]+	Ethyl 9-Hydroxy-10,12-octadecadienoic acid	Lipids	-	--	12968.3	9818.27	10061.6	12402.1	15271.3	12243.7	7464.9	7375.53	5927.9	9554.37	9784.1
Lmqp006559	330.34	312.33	329.327	C20H43NO2	[M+H]+	2-Amino-1,3-eicosanediol	Saccharides and Alcohols	-	--	840857	889953	711087	802743	858240	682570	740327	706563	829850	819720	774415
Hmqn003054	329.23	311.23	330.24	C18H34O5	[M-H]-	9,10,11-Trihydroxy-12-octadecenoic acid	Lipids	61911-67-9	--	3934.1	3586	3925.27	4209.83	5039.83	5466.73	4064.83	3233.6	3382.8	5224.13	4072.4
Lmbn004240	329.23	199.13	330.241	C18H34O5	[M-H]-	9,10-Dihydroxy-12,13-epoxyoctadecanoic acid	Lipids	-	C14837	1879.53	2176.2	1903.03	2036.67	2165.77	1790.97	2154.93	2090.03	2033.67	2118.53	1916.6
pmn001694	329.23	229.15	330.241	C18H34O5	[M-H]-	9,10,13-Trihydroxy-11-Octadecenoic Acid	Lipids	29907-57-1	C14835	36353.3	36389	36733.3	35669.7	53009.7	46065.3	42974	34744	33025	45125.7	40006.8
pmp001284	331.28	313.27	330.277	C19H38O4	[M+H]+	Monopalmitin	Lipids	542-44-9	--	28175.7	32404.3	36297.3	42272	55324.3	19767.7	27509	27577.3	30810.7	33812.3	38982.5
pme3184	332.08	136	331.068	C10H14N5O6P	[M+H]+	2'-Deoxyadenosine-5'-monophosphate	Nucleotides and derivatives	653-63-4	C00360	8943.27	72757.3	153150	184627	108588	17503.3	20335.3	14557	37458.7	33264.3	49574.5
pmb0789	332.13	152.07	331.127	C14H21NO8	[M+H]+	Pyridoxine-5'-O-glucoside	Vitamin	-	C03996	5262.37	4131.53	18027.3	28100	27929.7	4852.43	2776.67	4346	4326.5	7003.27	6825.9
pmc0066	333.05	137.05	332.052	C10H13N4O7P	[M+H]+	2'-Deoxyinosine-5'-monophosphate	Nucleotides and derivatives	3393-18-8	C06196	7.01667e+06	5324000	4.26153e+06	4.64837e+06	7199900	1744000	2.10877e+06	2.47183e+06	5466600	4140200	3458125
mws0675	335.06	123	334.057	C11H15N2O8P	[M+H]+	β-Nicotinamide mononucleotide	Nucleotides and derivatives	1094-61-7	C00455	435503	323050	811997	640447	874980	63349.7	35709.3	33052.3	47483.3	74077.3	323578
pme3311	339	97	339.996	C6H14O12P2	[M-H]-	D-Fructose-1,6-biphosphate*	Saccharides and Alcohols	488-69-7	C00354	65218.7	112600	74106.3	49160.7	99501.3	136733	97522.3	140203	57651.7	125823	84016.2
Zmyn000083	338.99	78.96	339.996	C6H14O12P2	[M-H]-	D-Glucose 1,6-bisphosphate*	Saccharides and Alcohols	10139-18-1	C01231	137723	160107	244647	288657	232417	343180	196830	228957	119890	182587	193782
pme0519	341.11	119.03	342.116	C12H22O11	[M-H]-	D-Sucrose*	Saccharides and Alcohols	57-50-1	C00089	2694800	2136000	1.87953e+06	2.79717e+06	3117100	1.80977e+06	1816200	2.33453e+06	1715400	1.85623e+06	2101725
Lmsn000381	341.11	89.02	342.116	C12H22O11	[M-H]-	D-Maltose*	Saccharides and Alcohols	133-99-3	C01971	2540800	2.92047e+06	1.84213e+06	3.43587e+06	2.90533e+06	1783500	2.17977e+06	2724900	2512300	1.71903e+06	2032275
MA10039641	341.11	89.02	342.116	C12H22O11	[M-H]-	Lactobiose*	Saccharides and Alcohols	63-42-3	C00243	2196900	2.79753e+06	2.42997e+06	2.93633e+06	4284700	1652800	2085900	2100000	1.72753e+06	2273000	2148200
Zmjn000425	341.11	89.02	342.116	C12H22O11	[M-H]-	D-Lactulose*	Saccharides and Alcohols	4618-18-2	C07064	201610	650003	9	9	9	118827	211373	309220	464587	444937	462760
mws1080	341.11	179	342.116	C12H22O11	[M-H]-	Galactinol*	Saccharides and Alcohols	3687-64-7	C01235	3.56937e+06	4.40347e+06	4.10237e+06	5.75543e+06	6972500	3.43597e+06	3355200	3696800	3309700	3114800	3802875
mws1333	341.11	113	342.116	C12H22O11	[M-H]-	Melibiose*	Saccharides and Alcohols	585-99-9	C05402	2195600	2.65427e+06	2405400	2788400	3.08633e+06	1.87853e+06	1.90053e+06	2.51223e+06	2095800	1.80767e+06	2135650
mws5038	341.11	89.02	342.116	C12H22O11	[M-H]-	Isomaltulose*	Saccharides and Alcohols	13718-94-0	C01742	2986800	3.74493e+06	3.08063e+06	4.26793e+06	4120300	2.56377e+06	2.38987e+06	3.68733e+06	2344100	2.18427e+06	2723125
mws0264	341.11	119	342.116	C12H22O11	[M-H]-	D-Trehalose*	Saccharides and Alcohols	99-20-7	C01083	3.57927e+06	4.16673e+06	3652100	4.25873e+06	4313300	3.16677e+06	2.90627e+06	3.85483e+06	3.14793e+06	2400000	3353075
mws0609	344.04	150	345.047	C10H12N5O7P	[M-H]-	Guanosine 3',5'-cyclic monophosphate	Nucleotides and derivatives	7665-99-8	C00942	8376.5	13703	61560	49807.3	220770	11110	8349.13	8762.53	19951	61556.7	33379
pmb0981	348.07	136	347.063	C10H14N5O7P	[M+H]+	Adenosine 5'-monophosphate	Nucleotides and derivatives	61-19-8	C00020	627193	5086400	11816000	1.40153e+07	1.14817e+07	308273	444467	493893	1762000	1.06933e+06	2640075
pmb0532	349.05	137.3	348.047	C10H13N4O8P	[M+H]+	Inosine 5'-monophosphate	Nucleotides and derivatives	131-99-7	C00130	42118.3	401753	855473	1.05127e+06	807727	25997.3	32047	36013.3	128733	83735	192015
pmb1562	351.25	146.9	350.246	C21H34O4	[M+H]+	1-Stearidonoyl-Glycerol	Lipids	-	--	14276	12691.7	15753.7	18071.7	19709	12748	13231.7	13626.3	13493	13278	14579.2
Lmhp011562	353.27	261.22	352.261	C21H36O4	[M+H]+	1-α-Linolenoyl-glycerol	Lipids	-	--	538123	863347	1.55637e+06	2.07763e+06	2.84697e+06	575297	977110	954100	1.28413e+06	1.37387e+06	1063185
Lmhp112042	355.28	263.24	354.277	C21H38O4	[M+H]+	1-Linoleoylglycerol	Lipids	2277-28-3	--	47236	35568.3	78844.7	117348	194103	24025.3	29627.7	28185	32450.7	37136	55346.8
pmb0296	357.3	265.4	356.293	C21H40O4	[M+H]+	1-Oleoyl-Sn-Glycerol	Lipids	129784-87-8	--	52480.7	54238	93488	138986	121392	41437	33628	39554	26939.3	57557.3	71948.5
pmb0998	364.07	152.1	363.058	C10H14N5O8P	[M+H]+	Guanosine 5'-monophosphate	Nucleotides and derivatives	85-32-5	C00144	197150	615217	913920	1065930	854123	71349.3	86229.3	90834.7	133220	146600	337265
pmb0964	366.2	204.1	365.17	C16H23N5O5	[M+H]+	Isopentenyladenine-7-N-glucoside	Nucleotides and derivatives	-	--	230540	9	9	9	9	114908	127233	177200	177247	111975	150488
mws0232	377.15	243	376.138	C17H20N4O6	[M+H]+	Riboflavin (Vitamin B2)	Vitamin	83-88-5	C00255	12291.7	23932.3	25033.7	33552	25327	50444	47181.7	52724.7	31952.3	73775	29269.2
pme3337	384.12	252	383.108	C14H17N5O8	[M+H]+	Succinyladenosine	Nucleotides and derivatives	4542-23-8	--	318967	1.37447e+06	3171900	3.01807e+06	6.15527e+06	198230	204933	232847	350130	524717	1593300
pme1286	385.13	250	384.122	C14H20N6O5S	[M+H]+	S-(5'-Adenosy)-L-homocysteine	Amino acids and derivatives	979-92-0	C00021	18279.7	48901	173400	157117	202387	37651	25070	28977.7	33559.3	26694	63385.2
pme2735	399.2	250	398.137	C15H22N6O5S	[M+H]+	S-Adenosyl-L-methionine	Amino acids and derivatives	29908-03-0	C00019	997950	1.45932e+06	1475720	2.15897e+06	756037	879640	864397	1.05633e+06	1394920	1236400	1.26239e+06
pmc0281	400.15	136.11	399.139	C15H21N5O8	[M+H]+	Ribosyladenosine	Nucleotides and derivatives	-	--	32107.7	24448	25550.3	31945.3	23299.7	37219.3	26265.7	28609	19771.3	38184.7	25775.8
Cmbp005948	401.12	163.04	400.116	C21H20O8	[M+H]+	1-O-p-Hydroxycinnamoyl-3-O-caffeoylglycerol	Lipids	-	--	3741.13	9	9	9	9	6549.57	2063.23	1832.83	2561.07	1265.7	2465.47
pmf0248	403.36	373.1	402.35	C27H46O2	[M+H]+	Delta-Tocopherol	Vitamin	119-13-1	C14151	10990.7	10388.8	10823	10676.5	11023	10640.2	10457.7	11203.3	11339	11574.7	10906.8
pme3007	402.99	159	404.002	C9H14N2O12P2	[M-H]-	Uridine 5'-diphosphate	Nucleotides and derivatives	27821-45-0	C00015	110607	206247	218823	143007	9	165070	170847	197643	146140	155383	156428
pmd0153	409.24	153	410.243	C19H39O7P	[M-H]-	LysoPA 16:0	Lipids	22002-85-3	C04036	9	24826	9	9	9	9	22909	23060.3	23326.7	25139.3	23768.5
pmb2165	412.25	184.07	411.239	C18H38NO7P	[M+H]+	LysoPC 10:0	Lipids	22248-63-1	--	2446.13	2119.53	1140.37	9	9	1068.68	2770.67	2474.4	1339.79	2350.47	1860.28
mws2523	421.08	241.1	422.083	C12H23O14P	[M-H]-	Trehalose 6-phosphate	Saccharides and Alcohols	4484-88-2	C00689	53135	57482.3	59610	50662	64437	53686.3	68802	83267	77526.3	69895	55053
Lmhp008337	426.26	285.24	425.254	C19H40NO7P	[M+H]+	LysoPE 14:0	Lipids	-	--	6759.4	4430.37	3398.33	3096	3564.23	3977.77	3781.33	3642.8	3437.57	3153.2	3916.45
pme2117	426	159	427.029	C10H15N5O10P2	[M-H]-	Adenosine 5'-diphosphate	Nucleotides and derivatives	58-64-0	C00008	96130.3	917917	1588400	1.30703e+06	746683	723413	525763	1006420	1.03924e+06	1.39723e+06	688210
Lmhp008273	438.26	297.24	437.254	C20H40NO7P	[M+H]+	LysoPE 15:1	Lipids	-	--	3784.53	2963.03	4723.87	2335.87	2453.17	1944.87	3015.27	2601.7	3092.77	4705.73	3065.95
Lmhp008885	440.28	299.26	439.27	C20H42NO7P	[M+H]+	LysoPE 15:0	Lipids	-	--	5568	2968.7	4363.67	2194.27	3638.97	2104.73	2048.77	1490.43	1181.39	962.53	2342
pmb0862	440.28	184.07	439.27	C20H42NO7P	[M+H]+	LysoPC 12:0	Lipids	20559-18-6	--	1529.1	2813.67	1861.3	2804.87	3441.6	2109.93	1857.5	2262.6	3170.53	1977.87	2469.72
pme1014	445.3	341.3	444.303	C31H40O2	[M+H]+	Menatetrenone (Vitamin K2)	Vitamin	11032-49-8	--	56389.7	56546	51425.7	57327	53391	55831.3	68700	62965.3	58860.7	63555.7	196995
Lmhp007836	448.25	307.23	447.239	C21H38NO7P	[M+H]+	LysoPE 16:3	Lipids	-	--	9	674.067	4361.37	1177.09	1513.46	991.483	896.93	985.12	1965.67	7029.9	1996.85
Lmhp008763	452.28	311.26	451.27	C21H42NO7P	[M+H]+	LysoPE 16:1	Lipids	-	--	202383	371593	614073	269997	295547	483580	826810	1.06041e+06	1121120	2.03243e+06	691388
pmb0876	454.29	313.27	453.286	C21H44NO7P	[M+H]+	LysoPE 16:0	Lipids	53862-35-4	--	12110300	1.46573e+07	1.49543e+07	9.24813e+06	1.05295e+07	9261100	11225000	1.10583e+07	7573500	9.15723e+06	11641500
pmb0464	458.1	116.3	457.143	C16H27NO14	[M+H]+	L-Aspartic acid-O-diglucoside	Amino acids and derivatives	-	--	3.16017e+06	9664300	6.03127e+06	1.21697e+07	8687000	1177040	2.46013e+06	2.41153e+06	3539200	2.51153e+06	5589175
Lmhp009464	466.29	325.27	465.286	C22H44NO7P	[M+H]+	LysoPE 17:1	Lipids	-	--	48105.3	46943	41728.3	24234	22318	25832.7	24539.3	23828.3	14999.7	17661.7	29493.2
Lmhp010162	468.31	327.29	467.301	C22H46NO7P	[M+H]+	LysoPE 17:0	Lipids	-	--	4520.23	2055.13	1277.27	804.627	1822.67	2195.47	1712.5	1497.3	795.077	1026.34	1695.42
pmd0130	468.31	184.07	467.301	C22H46NO7P	[M+H]+	LysoPC 14:0	Lipids	20559-16-4	--	34474.7	35025.3	24923	24587	21906	30617.3	35565.7	36277.3	40282	34430.7	32563
Lmhp008589	476.28	335.26	475.27	C23H42NO7P	[M+H]+	LysoPE 18:3	Lipids	-	--	1.56703e+06	5126400	1.67637e+07	10128300	1.00605e+07	1.85047e+06	2015800	2.45423e+06	3.78413e+06	7.30263e+06	6484025
pmb0874	478.29	337.27	477.286	C23H44NO7P	[M+H]+	LysoPE 18:2	Lipids	-	--	26340000	2.98693e+07	2.42367e+07	1.86323e+07	13987000	2.42303e+07	2.26037e+07	22893000	13825000	14183000	21775000
mws0289	480.31	339.29	479.301	C23H46NO7P	[M+H]+	LysoPE 18:1	Lipids	89576-29-4	--	2.60107e+06	2488200	2.21207e+06	1430480	1414900	2.15593e+06	2.29417e+06	2.25207e+06	1520000	1.74127e+06	2042325
pmb2260	480.31	184.07	479.301	C23H46NO7P	[M+H]+	LysoPC 15:1	Lipids	-	--	254570	419040	409987	191917	122743	125880	153743	152920	188533	229723	226715
Lmhp009129	482.32	184.07	481.317	C23H48NO7P	[M+H]+	LysoPC 15:0	Lipids	-	--	29453.3	26653.7	30238	23462.3	24838.7	13757	14742	12095.7	10953.7	8651.87	21232.2
pmb0880	482.32	341.31	481.317	C23H48NO7P	[M+H]+	LysoPE 18:0	Lipids	-	--	33479.7	33925.3	27180	21167	19623	28051.7	31671.7	29306	20211.3	22126	27665.8
Hmyn007168	483.27	255.23	484.278	C22H45O9P	[M-H]-	LysoPG 16:0	Lipids	-	--	907717	1.21513e+06	1.23407e+06	891347	773603	1.12857e+06	918663	981497	541327	724300	925815
Lmmn000214	487.17	341.11	488.174	C18H32O15	[M-H]-	Solatriose	Saccharides and Alcohols	528-40-5	--	70371.3	290710	250080	370030	342053	84514.7	172137	318087	333303	427203	223282
pmb0863	492.31	184.07	491.301	C24H46NO7P	[M+H]+	LysoPC 16:2	Lipids	-	--	87414	136993	95297	56950	36334.7	116453	111493	113493	80860	113490	94673.8
Lmhp008833	494.32	184.07	493.317	C24H48NO7P	[M+H]+	LysoPC 16:1	Lipids	-	--	1.95137e+06	2753000	3.95687e+06	2.16583e+06	1.99737e+06	4.24217e+06	6.08367e+06	6.88293e+06	6.20343e+06	1.01144e+07	4679975
pmd0132	496.34	184.07	495.332	C24H50NO7P	[M+H]+	LysoPC 16:0	Lipids	-	--	2.81877e+06	2.52557e+06	1539600	1079300	1.06563e+06	1761300	2.28983e+06	2312800	1.52493e+06	1.32883e+06	1914950
Lmhp008688	500.28	359.26	499.27	C25H42NO7P	[M+H]+	LysoPE 20:5	Lipids	-	--	9	9	9	9	9	9634	9	9	1566.77	9	1214.66
Lmhp009349	502.29	361.27	501.286	C25H44NO7P	[M+H]+	LysoPE 20:4	Lipids	-	--	2811.53	3546.87	2398.9	1875.23	1312.42	2702.97	3221.03	2736.87	1072.4	1583.27	2116.85
Lmhp009802	504.31	363.29	503.301	C25H46NO7P	[M+H]+	LysoPE 20:3	Lipids	-	--	5847.5	6144.97	9909.6	6040.53	5628.8	8404.07	6545.6	5361.2	3877.67	3981.73	6114.67
pme2125	503.16	179	504.169	C18H32O16	[M-H]-	Raffinose*	Saccharides and Alcohols	512-69-6	C00492	92647.3	72514	83652.7	145203	92566	33308.7	46946	86638	105979	123367	61099.5
mws1589	503.16	179	504.169	C18H32O16	[M-H]-	D-Panose*	Saccharides and Alcohols	33401-87-5	C00713	8777.8	13605.7	22382	18250	27356.9	8707.87	11703.7	22830.7	27908.7	63122	11888.5
Hmqp000191	505.18	127.03	504.17	C18H32O16	[M+H]+	Planteose*	Saccharides and Alcohols	470-57-5	C03848	105473	105616	106095	98872	107171	44521.7	84874	93066.3	112643	94298	93883
Lmhp008718	506.32	184.07	505.317	C25H48NO7P	[M+H]+	LysoPC 17:2	Lipids	-	--	79233.3	79488.7	67727.7	43220.7	44136	74528	74495.7	65190	37401.3	49460	62730.2
Lmhp010514	506.32	365.31	505.317	C25H48NO7P	[M+H]+	LysoPE 20:2	Lipids	-	--	98896	93096.3	81793.3	47986.7	28445.7	165357	129127	118240	59603	74573	93395.5
Lmhp009590	508.34	184.07	507.332	C25H50NO7P	[M+H]+	LysoPC 17:1	Lipids	-	--	167687	278490	196657	124228	70008.7	140967	119343	115797	93005	100747	147630
Lmhp010515	510.36	184.07	509.348	C25H52NO7P	[M+H]+	LysoPC 17:0	Lipids	-	--	20773	14898	10281.8	8354.87	10198.7	10971.3	11064.7	9116.93	6693.1	6076.7	10932.8
Lmhp009773	515.32	261.22	514.314	C27H46O9	[M+H]+	1-α-Linolenoyl-glycerol-3-O-glucoside	Lipids	-	--	11525.3	5290.8	4386.03	4628.93	3088.8	6310.67	6914.73	3883.07	1961.97	3666.67	5847.95
Lmhp010573	517.34	263.24	516.33	C27H48O9	[M+H]+	1-Linoleoylglycerol-3-O-glucoside	Lipids	-	--	5882.83	2829.9	1473.1	1712.67	1225.64	1841.2	1738.13	2331.27	9	9	2417.52
pmb0865	518.32	184.07	517.317	C26H48NO7P	[M+H]+	LysoPC 18:3	Lipids	-	--	2.71973e+06	7.27463e+06	1.37517e+07	7424800	7.38257e+06	2.53587e+06	2.71573e+06	2.93783e+06	4.31623e+06	7.05767e+06	5717025
pmp001251	520.34	184.07	519.332	C26H50NO7P	[M+H]+	LysoPC 18:2	Lipids	-	--	15363000	1.66633e+07	1.31447e+07	1.05366e+07	8.14867e+06	13646000	12446000	1.29003e+07	7.23677e+06	7.31783e+06	12444750
Lmhp010190	522.36	184.07	521.348	C26H52NO7P	[M+H]+	LysoPC 18:1	Lipids	-	--	1.58443e+07	2.66343e+07	2.62457e+07	2.44797e+07	1.88737e+07	15103000	2.01963e+07	2.11473e+07	2.04907e+07	25850000	21006250
mws0126	524.37	184.07	523.364	C26H54NO7P	[M+H]+	LysoPC 18:0	Lipids	19420-57-6	--	275540	910297	710740	659027	608753	227393	366263	359123	340473	415860	459898
Lmhp007598	534.36	184.07	533.348	C27H52NO7P	[M+H]+	LysoPC 19:2	Lipids	-	--	24242.3	24842	5636.77	3739.42	1032.98	9481.33	15745.7	21035.3	5429.47	7691.33	12373.8
Lmhp010908	536.37	184.07	535.364	C27H54NO7P	[M+H]+	LysoPC 19:1	Lipids	-	--	9741.83	13624	13905	8599.9	4422.23	21684	18608.7	18978	9291.9	9565.93	13010.2
Zmfn000481	535.04	323.03	536.044	C14H22N2O16P2	[M-H]-	Uridine-5'-Diphosphate-D-Xylose	Nucleotides and derivatives	3616-06-6	C00190	105396	244213	427267	610120	378143	189920	162293	178950	158370	200833	194190
pmb2228	538.39	184.07	537.379	C27H56NO7P	[M+H]+	LysoPC 19:0	Lipids	108273-88-7	--	9497.83	8464.07	3958.97	2997.3	1153.88	4452.97	8118.23	7666.63	4758.9	6698.6	6206.95
Lmhp008742	542.32	184.07	541.317	C28H48NO7P	[M+H]+	LysoPC 20:5	Lipids	162440-04-2	--	9	9	9	9	9	19701.7	9	9	9	9	2517.57
Lmhp009890	546.36	184.07	545.348	C28H52NO7P	[M+H]+	LysoPC 20:3	Lipids	1199257-41-4	--	29484.3	55461.3	86874.3	60787.3	36016	43855.7	40274.7	41816.7	35397.7	44824.3	49701.8
pmd0146	548.37	184.07	547.364	C28H54NO7P	[M+H]+	LysoPC 20:2	Lipids	-	--	186040	193247	184020	124416	73692.3	216507	264680	252697	132820	159440	181725
Lmhp011549	550.39	184.07	549.379	C28H56NO7P	[M+H]+	LysoPC 20:1	Lipids	-	--	69604.3	185930	115527	84324	24574	69851	74902.7	81420.7	59044.7	64346.7	79176.8
pmd0143	552.4	184.07	551.395	C28H58NO7P	[M+H]+	LysoPC 20:0	Lipids	108341-80-6	--	904	1892.87	1430.42	9	9	7800.5	5824.67	11414.1	5208.5	1629.33	3109.27
pmb2922	565.05	323.1	566.055	C15H24N2O17P2	[M-H]-	Uridine 5'-diphospho-D-glucose	Nucleotides and derivatives	133-89-1	C00029	1.40223e+06	2.31687e+06	3419000	4.32393e+06	2.26073e+06	2.01233e+06	1859700	1.78923e+06	1.62637e+06	1.37592e+06	1660775
mws4134	611.14	306.08	612.152	C20H32N6O12S2	[M-H]-	Oxiglutatione	Amino acids and derivatives	27025-41-8	C00127	125820	160423	262577	411083	415210	483067	294820	319747	266443	325293	263990
pmb2653	649.1	145	650.227	C24H42O20	[M-H]-	D(+)-Melezitose O-rhamnoside	Saccharides and Alcohols	-	--	19018.7	19660.7	13971.5	25983.7	32937.3	10317.4	35779.3	18213.3	23073.3	65429.3	19885.5
pmb0530	664.12	136.2	663.109	C21H27N7O14P2	[M+H]+	Nicotinic acid adenine dinucleotide	Nucleotides and derivatives	53-84-9	C00003	129507	633757	1.59543e+06	1.81387e+06	1279000	452130	311680	402500	665827	769323	495655
Lmxp010913	676.45	184.08	675.448	C35H66NO9P	[M+H]+	1-(9Z-Octadecenoyl)-2-(9-oxo-nonanoyl)-sn-glycero-3-phosphocholine	Lipids	-	--	1606.17	9	9	9	9	9416.1	3680.3	3317.2	9	9	2231.53
Lmhp008744	677.37	261.22	676.367	C33H56O14	[M+H]+	1-α-Linolenoyl-glycerol-2,3-di-O-glucoside	Lipids	-	--	14844.3	4500.57	5842.2	6708.93	3548.8	4559.87	4316.7	4525.37	1523.48	1805.57	4760.08
Lmhp009384	679.39	263.24	678.383	C33H58O14	[M+H]+	1-Linoleoylglycerol-2,3-di-O-glucoside	Lipids	-	--	18117.7	6369.6	5569.97	6148.33	4249.13	3413.97	2870.57	2886.3	700.583	1618.79	4897.23
pme2651	742.1	620.1	743.075	C21H28N7O17P3	[M-H]-	NADP (Nicotinamide adenine dinucleotide phosphate)	Nucleotides and derivatives	53-59-8	C00006	47813.7	108429	188347	210487	157740	79503	58608.3	66699.3	119270	176953	98922.8
pme2746	784.15	437	785.157	C27H33N9O15P2	[M-H]-	Riboflavin 5'-Adenosine Diphosphate	Nucleotides and derivatives	146-14-5	C00016	65379.3	122430	152533	151587	120285	146900	111755	119903	128813	124053	91073.2

## Sheet: Table S2
Table S2. List of cluster 1 and cluster 2 metabolites by K-mean analysis.
Index	Formula	Compounds	Class	Sub Class
pme2122	C5H9N3	Histamine	Amino acids and derivatives	1
pme0120	C5H11NO2	5-Aminovaleric acid	Amino acids and derivatives	1
mws0263	C5H7NO3	5-Oxo-L-Proline	Amino acids and derivatives	1
Rfmb319	C6H11NO2	Pipecolic acid	Amino acids and derivatives	1
mws0216	C5H9NO3	Trans-4-Hydroxy-L-proline	Amino acids and derivatives	1
mws0712	C5H9NO3	N-Propionylglycine	Amino acids and derivatives	1
pme0057	C4H9NO2S	L-Homocysteine	Amino acids and derivatives	1
pme1002	C8H11NO	L-Tyramine	Amino acids and derivatives	1
Rfmb320	C7H13NO2	1-Methylpiperidine-2-carboxylic acid	Amino acids and derivatives	1
mws0340	C6H8O4	2,3-Dimethylsuccinic acid	Amino acids and derivatives	1
Lmqp000427	C6H11NO3	N-Methyl-Trans-4-Hydroxy-L-Proline	Amino acids and derivatives	1
mws1050	C5H9NO4	O-Acetylserine	Amino acids and derivatives	1
pme2914	C6H10O5	3-Hydroxy-3-methylpentane-1,5-dioic acid	Amino acids and derivatives	1
Lmbp000123	C6H13NO2S	L-Homomethionine	Amino acids and derivatives	1
mws0260	C6H14N4O2	L-Arginine	Amino acids and derivatives	1
mws0875	C5H10N2O3S	L-Cysteinyl-L-glycine	Amino acids and derivatives	1
pme0137	C7H12N2O4	N-Acetyl-L-Glutamine	Amino acids and derivatives	1
mws5041	C8H16N2O3	L-Glycyl-L-isoleucine*	Amino acids and derivatives	1
pme2743	C10H11NO3	N-Phenylacetylglycine	Amino acids and derivatives	1
Lmrj002244	C10H14N2O2	Cyclo(Pro-Pro)	Amino acids and derivatives	1
mws5037	C9H18N2O3	L-Alanyl-L-leucine	Amino acids and derivatives	1
mws5042	C11H14N2O3	L-Glycyl-L-phenylalanine	Amino acids and derivatives	1
Hmlp001371	C12H14N2O3	Cyclo(Tyr-Ala)	Amino acids and derivatives	1
pme2563	C8H14N2O5S	γ-Glu-Cys	Amino acids and derivatives	1
pme2890	C8H16N2O4S2	L-Homocystine	Amino acids and derivatives	1
Lmrj002793	C14H16N2O4	Cyclo(Phe-Glu)	Amino acids and derivatives	1
mws0629	C13H16N2O5	L-Aspartyl-L-Phenylalanine	Amino acids and derivatives	1
mws0582	C11H19N3O6S	S-(Methyl)glutathione	Amino acids and derivatives	1
ML10198895	C3H7NO2	N-Methylglycine	Amino acids and derivatives	2
pme3033	C4H9NO2	N,N-Dimethylglycine	Amino acids and derivatives	2
pme3017	C4H9NO2	2-Aminoisobutyric acid	Amino acids and derivatives	2
pme0010	C3H7NO3	L-Serine	Amino acids and derivatives	2
pme0006	C5H9NO2	L-Proline	Amino acids and derivatives	2
mws0256	C5H11NO2	L-Valine	Amino acids and derivatives	2
ML10181668	C6H11NO2	Cycloleucine	Amino acids and derivatives	2
mws0227	C6H13NO2	L-Leucine*	Amino acids and derivatives	2
mws0258	C6H13NO2	L-Isoleucine*	Amino acids and derivatives	2
mws1587	C6H13NO2	L-Norleucine*	Amino acids and derivatives	2
mws0001	C4H8N2O3	L-Asparagine	Amino acids and derivatives	2
pme2527	C5H12N2O2	L-Ornithine	Amino acids and derivatives	2
mws0219	C4H7NO4	L-Aspartic Acid	Amino acids and derivatives	2
pme0193	C5H10N2O3	L-Glutamine	Amino acids and derivatives	2
pme0026	C6H14N2O2	L-Lysine	Amino acids and derivatives	2
Zmzn000113	C5H9NO4	L-threo-3-Methylaspartate	Amino acids and derivatives	2
pme0014	C5H9NO4	L-Glutamic acid	Amino acids and derivatives	2
pme1210	C5H11NO2S	L-Methionine	Amino acids and derivatives	2
mws0254	C6H9N3O2	L-Histidine	Amino acids and derivatives	2
pme0128	C6H12N2O3	L-Alanyl-L-Alanine	Amino acids and derivatives	2
mws1550	C6H11NO2S	S-Allyl-L-cysteine	Amino acids and derivatives	2
pme2758	C5H9NO5	4-Hydroxy-L-glutamic acid	Amino acids and derivatives	2
pme1419	C6H13NO2S	L-Methionine methyl ester	Amino acids and derivatives	2
pme0021	C9H11NO2	L-Phenylalanine	Amino acids and derivatives	2
pme0253	C8H15NO3	N-Acetyl-L-leucine	Amino acids and derivatives	2
Zmyn000155	C7H14N2O3	N-α-Acetyl-L-ornithine	Amino acids and derivatives	2
pme2559	C6H9NO5	N-Acetyl-L-Aspartic Acid	Amino acids and derivatives	2
pme0008	C6H13N3O3	L-Citrulline	Amino acids and derivatives	2
Lmbp001216	C7H15NO2S	L-Dihomomethionine	Amino acids and derivatives	2
mws0250	C9H11NO3	L-Tyrosine	Amino acids and derivatives	2
Zmjp000182	C7H16N4O2	N-Monomethyl-L-arginine	Amino acids and derivatives	2
pme3388	C7H16N4O2	Homoarginine	Amino acids and derivatives	2
pme0075	C7H11NO5	N-Acetyl-L-glutamic acid	Amino acids and derivatives	2
pme0278	C7H14N2O4	2,6-Diaminooimelic acid	Amino acids and derivatives	2
NK10251888	C8H18N4O2	NG,NG-Dimethyl-L-arginine	Amino acids and derivatives	2
mws0282	C11H12N2O2	L-Tryptophan	Amino acids and derivatives	2
Zmgn002106	C11H13NO3	N-Acetyl-L-phenylalanine	Amino acids and derivatives	2
pme2566	C8H14N2O5	5-L-Glutamyl-L-amino acid	Amino acids and derivatives	2
Lmrj001698	C9H18N2O4	L-Seryl-L-Isoleucine	Amino acids and derivatives	2
mws0520	C11H13NO4	N-Acetyl-L-tyrosine	Amino acids and derivatives	2
Lmhp001670	C11H22N2O3	L-Valyl-L-Leucine	Amino acids and derivatives	2
mws4176	C12H16N2O3	L-Alanyl-L-Phenylalanine	Amino acids and derivatives	2
Lmhp002031	C12H24N2O3	L-Leucyl-L-Leucine	Amino acids and derivatives	2
mws0124	C13H14N2O3	N-(3-Indolylacetyl)-L-alanine	Amino acids and derivatives	2
Lmhp002001	C14H20N2O3	L-Valyl-L-Phenylalanine	Amino acids and derivatives	2
pme1712	C11H20N2O6	L-Saccharopine	Amino acids and derivatives	2
mws5035	C15H22N2O3	L-Leucyl-L-phenylalanine	Amino acids and derivatives	2
pme1086	C10H17N3O6S	Glutathione reduced form	Amino acids and derivatives	2
pmb2855	C11H20N2O8	L-Glutamine-O-glycoside	Amino acids and derivatives	2
pmb2857	C11H19NO9	L-Glutamic acid-O-glycoside	Amino acids and derivatives	2
mws0636	C18H20N2O3	L-Phenylalanyl-L-phenylalanine	Amino acids and derivatives	2
pme1286	C14H20N6O5S	S-(5'-Adenosy)-L-homocysteine	Amino acids and derivatives	2
pme2735	C15H22N6O5S	S-Adenosyl-L-methionine	Amino acids and derivatives	2
pmb0464	C16H27NO14	L-Aspartic acid-O-diglucoside	Amino acids and derivatives	2
mws4134	C20H32N6O12S2	Oxiglutatione	Amino acids and derivatives	2
pmb0302	C2H8NO3P	2-Aminoethylphosphonate	Lipids	1
Hmsn000210	C17H30O2	Methyl 7,10-hexadecadienoate	Lipids	1
Lmyn007883	C16H32O4	9,16-Dihydroxypalmitic acid	Lipids	1
Zmyn004714	C18H34O3	Ricinoleic acid	Lipids	1
pmf0297	C20H42O	1-Eicosanol	Lipids	1
ML10195036	C18H37NO2	3-Dehydrosphinganine	Lipids	1
pmn001610	C20H36O2	Eicosadienoic acid	Lipids	1
Cmbp005948	C21H20O8	1-O-p-Hydroxycinnamoyl-3-O-caffeoylglycerol	Lipids	1
pmd0153	C19H39O7P	LysoPA 16:0	Lipids	1
pmb2165	C18H38NO7P	LysoPC 10:0	Lipids	1
Lmhp008337	C19H40NO7P	LysoPE 14:0	Lipids	1
Lmhp008763	C21H42NO7P	LysoPE 16:1	Lipids	1
Lmhp009464	C22H44NO7P	LysoPE 17:1	Lipids	1
Lmhp010162	C22H46NO7P	LysoPE 17:0	Lipids	1
Hmyn007168	C22H45O9P	LysoPG 16:0	Lipids	1
pmb0863	C24H46NO7P	LysoPC 16:2	Lipids	1
Lmhp008833	C24H48NO7P	LysoPC 16:1	Lipids	1
pmd0132	C24H50NO7P	LysoPC 16:0	Lipids	1
Lmhp008688	C25H42NO7P	LysoPE 20:5	Lipids	1
Lmhp009349	C25H44NO7P	LysoPE 20:4	Lipids	1
Lmhp009802	C25H46NO7P	LysoPE 20:3	Lipids	1
Lmhp010514	C25H48NO7P	LysoPE 20:2	Lipids	1
Lmhp009590	C25H50NO7P	LysoPC 17:1	Lipids	1
Lmhp010515	C25H52NO7P	LysoPC 17:0	Lipids	1
Lmhp009773	C27H46O9	1-α-Linolenoyl-glycerol-3-O-glucoside	Lipids	1
Lmhp010573	C27H48O9	1-Linoleoylglycerol-3-O-glucoside	Lipids	1
Lmhp007598	C27H52NO7P	LysoPC 19:2	Lipids	1
Lmhp010908	C27H54NO7P	LysoPC 19:1	Lipids	1
pmb2228	C27H56NO7P	LysoPC 19:0	Lipids	1
Lmhp008742	C28H48NO7P	LysoPC 20:5	Lipids	1
pmd0146	C28H54NO7P	LysoPC 20:2	Lipids	1
Lmhp011549	C28H56NO7P	LysoPC 20:1	Lipids	1
pmd0143	C28H58NO7P	LysoPC 20:0	Lipids	1
Lmxp010913	C35H66NO9P	1-(9Z-Octadecenoyl)-2-(9-oxo-nonanoyl)-sn-glycero-3-phosphocholine	Lipids	1
Lmhp008744	C33H56O14	1-α-Linolenoyl-glycerol-2,3-di-O-glucoside	Lipids	1
Lmhp009384	C33H58O14	1-Linoleoylglycerol-2,3-di-O-glucoside	Lipids	1
mws0367	C18H30O2	α-Linolenic Acid*	Lipids	2
mws0366	C18H30O2	γ-Linolenic Acid*	Lipids	2
Lmbn005923	C18H30O2	Crepenynic acid	Lipids	2
YC512118	C18H35NO	Oleamide (9-Octadecenamide)	Lipids	2
Zmyn004548	C18H28O3	12-Oxo-phytodienoic acid	Lipids	2
pmb2786	C18H30O3	9-Hydroxy-10,12,15-octadecatrienoic acid	Lipids	2
pmb2221	C18H39NO3	4-Hydroxysphinganine	Lipids	2
Hmqp006023	C20H36O3	Ethyl 9-Hydroxy-10,12-octadecadienoic acid	Lipids	2
Lmhp011562	C21H36O4	1-α-Linolenoyl-glycerol	Lipids	2
Lmhp112042	C21H38O4	1-Linoleoylglycerol	Lipids	2
pmb0296	C21H40O4	1-Oleoyl-Sn-Glycerol	Lipids	2
Lmhp008273	C20H40NO7P	LysoPE 15:1	Lipids	2
Lmhp008885	C20H42NO7P	LysoPE 15:0	Lipids	2
pmb0862	C20H42NO7P	LysoPC 12:0	Lipids	2
Lmhp007836	C21H38NO7P	LysoPE 16:3	Lipids	2
Lmhp008589	C23H42NO7P	LysoPE 18:3	Lipids	2
pmb2260	C23H46NO7P	LysoPC 15:1	Lipids	2
pmb0865	C26H48NO7P	LysoPC 18:3	Lipids	2
mws0126	C26H54NO7P	LysoPC 18:0	Lipids	2
Lmhp009890	C28H52NO7P	LysoPC 20:3	Lipids	2
pme3200	C2H7N3	1-methylguanidine	Nucleotides and derivatives	1
mws0572	C5H7N3O	5-Methylcytosine	Nucleotides and derivatives	1
pmb0374	C5H5N5	2-Aminopurine	Nucleotides and derivatives	1
pme1173	C5H4N4O	Allopurinol	Nucleotides and derivatives	1
pme1194	C9H13N3O4	2'-Deoxycytidine	Nucleotides and derivatives	1
HJAP106	C12H11N5O	N6-(4-hydroxybenzyl)adnine riboside	Nucleotides and derivatives	1
mws0976	C9H12N2O6	β-Pseudouridine	Nucleotides and derivatives	1
pme3961	C10H13N5O3	2'-Deoxyadenosine	Nucleotides and derivatives	1
pme0230	C10H13N5O4	Adenosine	Nucleotides and derivatives	1
pme1184	C10H13N5O4	2'-Deoxyguanosine	Nucleotides and derivatives	1
pme1119	C10H12N4O5	Inosine	Nucleotides and derivatives	1
mws0668	C10H12N4O6	Xanthosine	Nucleotides and derivatives	1
Lmqp000329	C8H14N3O7P	5-Aminoimidazole ribonucleotide	Nucleotides and derivatives	1
pmb0964	C16H23N5O5	Isopentenyladenine-7-N-glucoside	Nucleotides and derivatives	1
pme3007	C9H14N2O12P2	Uridine 5'-diphosphate	Nucleotides and derivatives	1
pme0257	C4H4N2O2	Uracil	Nucleotides and derivatives	2
pme0040	C5H5N5	Adenine	Nucleotides and derivatives	2
pme0033	C5H4N4O	Hypoxanthine	Nucleotides and derivatives	2
mws0847	C6H7N5	1-Methyladenine	Nucleotides and derivatives	2
pme1109	C5H5N5O	Guanine*	Nucleotides and derivatives	2
pme0183	C5H5N5O	Isoguanine*	Nucleotides and derivatives	2
pme0256	C5H4N4O2	Xanthine	Nucleotides and derivatives	2
mws1641	C6H4N4O2	Lumazine	Nucleotides and derivatives	2
pme2060	C10H13N5	N6-Isopentenyladenine	Nucleotides and derivatives	2
pme0264	C10H14N2O5	Thymidine	Nucleotides and derivatives	2
mws0248	C9H12N2O6	Uridine	Nucleotides and derivatives	2
mws1060	C10H12N4O5	9-(Arabinosyl)hypoxanthine	Nucleotides and derivatives	2
Hmhp001812	C11H15N5O4	2'-O-Methyladenosine	Nucleotides and derivatives	2
pme1178	C10H13N5O5	Guanosine	Nucleotides and derivatives	2
pme1474	C11H15N5O3S	5'-Deoxy-5'-(methylthio)adenosine	Nucleotides and derivatives	2
pmb0197	C11H15N5O5	N7-Methylguanosine	Nucleotides and derivatives	2
pme1373	C9H14N3O7P	2'-Deoxycytidine-5'-monophosphate	Nucleotides and derivatives	2
Lmcp002302	C12H17N5O5	N6-(2-Hydroxyethyl)adenosine	Nucleotides and derivatives	2
pme3967	C12H17N5O5	2-(Dimethylamino)guanosine	Nucleotides and derivatives	2
pme3188	C9H13N2O9P	Uridine 5'-monophosphate	Nucleotides and derivatives	2
pme3184	C10H14N5O6P	2'-Deoxyadenosine-5'-monophosphate	Nucleotides and derivatives	2
pmc0066	C10H13N4O7P	2'-Deoxyinosine-5'-monophosphate	Nucleotides and derivatives	2
mws0675	C11H15N2O8P	β-Nicotinamide mononucleotide	Nucleotides and derivatives	2
mws0609	C10H12N5O7P	Guanosine 3',5'-cyclic monophosphate	Nucleotides and derivatives	2
pmb0981	C10H14N5O7P	Adenosine 5'-monophosphate	Nucleotides and derivatives	2
pmb0532	C10H13N4O8P	Inosine 5'-monophosphate	Nucleotides and derivatives	2
pmb0998	C10H14N5O8P	Guanosine 5'-monophosphate	Nucleotides and derivatives	2
pme3337	C14H17N5O8	Succinyladenosine	Nucleotides and derivatives	2
pme2117	C10H15N5O10P2	Adenosine 5'-diphosphate	Nucleotides and derivatives	2
Zmfn000481	C14H22N2O16P2	Uridine-5'-Diphosphate-D-Xylose	Nucleotides and derivatives	2
pmb2922	C15H24N2O17P2	Uridine 5'-diphospho-D-glucose	Nucleotides and derivatives	2
pmb0530	C21H27N7O14P2	Nicotinic acid adenine dinucleotide	Nucleotides and derivatives	2
pme2651	C21H28N7O17P3	NADP (Nicotinamide adenine dinucleotide phosphate)	Nucleotides and derivatives	2
pme2746	C27H33N9O15P2	Riboflavin 5'-Adenosine Diphosphate	Nucleotides and derivatives	2
Lmqp000873	C4H4O3	Succinic anhydride	Organic acids	1
mws4052	C4H7NO2	1-Aminocyclopropane-1-carboxylic acid	Organic acids	1
pme2935	C5H8O3	2-Oxovaleric acid	Organic acids	1
mws0192	C4H6O4	Succinic acid	Organic acids	1
mws0470	C4H6O4	Methylmalonic acid	Organic acids	1
pme3096	C3H5NO4	Aminomalonic acid	Organic acids	1
Lmgp002593	C7H6O2	3-hydroxybenzaldehyde	Organic acids	1
mws0236	C2H7NO3S	2-Aminoethanesulfonic acid	Organic acids	1
pme0243	C5H8O4	Glutaric acid	Organic acids	1
pme3034	C5H8O4	Ethylmalonic acid	Organic acids	1
mws0275	C4H6O5	L-Malic acid	Organic acids	1
Lmbn000198	C4H6O5	3-Dehydro-L-Threonic Acid	Organic acids	1
mws0336	C6H6N2O2	Urocanic acid	Organic acids	1
pme2380	C5H6O5	α-Ketoglutaric acid	Organic acids	1
mws0208	C6H10O4	Adipic Acid	Organic acids	1
mws0924	C6H10O4	2-Methylglutaric acid	Organic acids	1
Lmbn001676	C6H10O4	3-Hydroxy-3-Methyl-2-Oxopentanoic Acid	Organic acids	1
pme3154	C6H12O4	Mevalonic acid	Organic acids	1
mws0262	C4H6O6	L-Tartaric acid	Organic acids	1
mws0639	C7H6O4	2,3-Dihydroxybenzoic Acid	Organic acids	1
pme2589	C6H8O5	2-Oxoadipic acid	Organic acids	1
Lmmn001643	C9H8O3	2-Hydroxycinnamic acid	Organic acids	1
pme0282	C8H6O4	Phthalic acid	Organic acids	1
mws2125	C3H5O6P	Phosphoenolpyruvate	Organic acids	1
Xmbp001692	C7H6O5	2,4,6-Trihydroxybenzoic acid	Organic acids	1
ML10176345	C7H8O5	3-Dehydroshikimic acid	Organic acids	1
mws0154	C7H10O5	Shikimic acid	Organic acids	1
Zmgn001448	C7H12O5	2-Propylmalic Acid*	Organic acids	1
pmb3101	C7H12O5	2-Isopropylmalic Acid*	Organic acids	1
Zmyn000453	C6H8O7	Isocitric Acid*	Organic acids	1
mws0277	C7H12O6	Quinic Acid	Organic acids	1
pme1654	C12H18O3	Jasmonic acid	Organic acids	1
Lmtn004049	C15H20O4	Abscisic acid	Organic acids	1
Lmmn003323	C16H32O3	2-Hydroxyhexadecanoic acid	Organic acids	1
pme2074	C18H29NO4	(-)-Jasmonoyl-L-Isoleucine	Organic acids	1
Lmgn000188	C3H6O3	D-Lactic Acid	Organic acids	2
Lmgn000219	C4H6O3	Succinic semialdehyde	Organic acids	2
pme3011	C4H9NO2	γ-Aminobutyric acid	Organic acids	2
mws0206	C4H8O3	2-Hydroxybutyric Acid	Organic acids	2
pme1975	C3H4O4	Malonic acid	Organic acids	2
mws0376	C4H4O4	Fumaric acid	Organic acids	2
mws0147	C5H10O3	β-Hydroxyisovaleric acid	Organic acids	2
Lmbp000668	C6H5NO2	Isonicotinic acid*	Organic acids	2
Zmpn000638	C4H9N3O2	3-Guanidinopropionic acid	Organic acids	2
pme0274	C6H13NO2	6-Aminocaproic acid	Organic acids	2
Lmgn000160	C4H8N2O3	3-Ureidopropionic Acid	Organic acids	2
pme3207	C6H6O4	Muconic acid	Organic acids	2
pme0295	C6H11NO3	4-Acetamidobutyric acid	Organic acids	2
Wmzn000227	C6H10O4	2,2-Dimethylsuccinic acid	Organic acids	2
pmf0420	C9H10O2	Benzyl acetate	Organic acids	2
Lmbn001467	C7H13NO3	5-Acetamidopentanoic Acid	Organic acids	2
mws0344	C5H10O6	D-Xylonic acid	Organic acids	2
mws1189	C6H10O7	D-Galacturonic acid*	Organic acids	2
pmb2657	C10H18N4O6	Argininosuccinic acid	Organic acids	2
pma0134	C4H8O4	D-(-)-Threose	Saccharides and Alcohols	1
ML10171848	C5H8O5	D-Arabinono-1,4-lactone	Saccharides and Alcohols	1
pme2529	C6H12O5	1,5-Anhydro-D-glucitol	Saccharides and Alcohols	1
Zmzn000078	C3H7O6P	Dihydroxyacetone phosphate	Saccharides and Alcohols	1
mws2104	C7H14O6	D-Pinitol	Saccharides and Alcohols	1
Zmzn000079	C4H9O7P	D-Erythrose-4-phosphate	Saccharides and Alcohols	1
Zmyn000108	C6H10O8	D-Saccharic acid*	Saccharides and Alcohols	1
mws4174	C8H15NO6	N-Acetyl-D-mannosamine*	Saccharides and Alcohols	1
pma6455	C5H11O8P	Ribulose-5-phosphate	Saccharides and Alcohols	1
mws1090	C6H13O9P	Glucose-1-phosphate*	Saccharides and Alcohols	1
pme3313	C6H13O9P	D-Fructose 6-phosphate*	Saccharides and Alcohols	1
mws0866	C6H13O9P	D-Glucose 6-phosphate*	Saccharides and Alcohols	1
pmb3081	C6H11PO11	Glucarate O-Phosphoric acid	Saccharides and Alcohols	1
pme3311	C6H14O12P2	D-Fructose-1,6-biphosphate*	Saccharides and Alcohols	1
Zmyn000083	C6H14O12P2	D-Glucose 1,6-bisphosphate*	Saccharides and Alcohols	1
Zmjn000425	C12H22O11	D-Lactulose*	Saccharides and Alcohols	1
mws0889	C4H8O5	D-Threonic Acid	Saccharides and Alcohols	2
mws1499	C5H10O5	D-Arabinose	Saccharides and Alcohols	2
mws0854	C6H12O5	Rhamnose	Saccharides and Alcohols	2
pme2435	C6H12O5	L-Fucose	Saccharides and Alcohols	2
mws4175	C6H8O6	D-Glucurono-6,3-lactone	Saccharides and Alcohols	2
mws1164	C6H12O6	D-Fructose*	Saccharides and Alcohols	2
Hmln000297	C6H12O6	Inositol*	Saccharides and Alcohols	2
mws4170	C6H12O6	D-Glucose*	Saccharides and Alcohols	2
pmf0139	C6H12O6	D-Galactose*	Saccharides and Alcohols	2
pmf0138	C6H12O6	D-Mannose*	Saccharides and Alcohols	2
pme2237	C6H14O6	Dulcitol*	Saccharides and Alcohols	2
mws0214	C6H14O6	D-Sorbitol*	Saccharides and Alcohols	2
pme3705	C6H10O7	D-Glucoronic acid*	Saccharides and Alcohols	2
pme0534	C6H12O7	Gluconic acid	Saccharides and Alcohols	2
pme1261	C9H19NO4	D-Panthenol	Saccharides and Alcohols	2
Zmpn000199	C6H10O8	D-Galactaric acid*	Saccharides and Alcohols	2
Lmmn000214	C18H32O15	Solatriose	Saccharides and Alcohols	2
pme2125	C18H32O16	Raffinose*	Saccharides and Alcohols	2
mws1589	C18H32O16	D-Panose*	Saccharides and Alcohols	2
Hmqp000191	C18H32O16	Planteose*	Saccharides and Alcohols	2
pmb2653	C24H42O20	D(+)-Melezitose O-rhamnoside	Saccharides and Alcohols	2
MA10039492	C6H6O6	Dehydroascorbic acid	Vitamin	1
Hmfn000531	C6H8O6	L-Ascorbic acid (Vitamin C)	Vitamin	1
mws1337	C9H17NO5	D-Pantothenic Acid	Vitamin	1
pme2266	C10H16N2O3S	Biotin	Vitamin	1
pma1751	C12H15NO7	N-(beta-D-Glucosyl)nicotinate	Vitamin	1
pme2289	C20H30O	Retinol (Vitamin A1)	Vitamin	1
pme3511	C10H12N2O8	Orotidine	Vitamin	1
mws0232	C17H20N4O6	Riboflavin (Vitamin B2)	Vitamin	1
mws0133	C6H6N2O	Nicotinamide	Vitamin	2
pme0490	C6H5NO2	Nicotinic acid (Vitamin B3)*	Vitamin	2
pme2165	C5H4N2O4	Orotic acid	Vitamin	2
Zmjp000624	C8H9NO3	Pyridoxal	Vitamin	2
pme1383	C8H11NO3	Pyridoxine	Vitamin	2
pma3101	C11H14NO6+	Nicotinate D-ribonucleoside	Vitamin	2
pmb0789	C14H21NO8	Pyridoxine-5'-O-glucoside	Vitamin	2

## Sheet: Table S3
Table S3. List of DAMs between HZS1 and HZS5.
Index	Formula	Compounds	Class	VIP	p_value	Log2FC	Type
ML10198895	C3H7NO2	N-Methylglycine	Amino acids and derivatives	1.12902	0.0145361	2.68724	up
pme3033	C4H9NO2	N,N-Dimethylglycine	Amino acids and derivatives	1.152	0.000419006	2.06614	up
pme3017	C4H9NO2	2-Aminoisobutyric acid	Amino acids and derivatives	1.16383	0.0010813	3.2696	up
pme0010	C3H7NO3	L-Serine	Amino acids and derivatives	1.07782	0.02625	1.40087	up
pme0006	C5H9NO2	L-Proline	Amino acids and derivatives	1.16248	0.00246473	2.17689	up
mws0256	C5H11NO2	L-Valine	Amino acids and derivatives	1.16153	0.00398235	1.65009	up
pme0120	C5H11NO2	5-Aminovaleric acid	Amino acids and derivatives	1.14594	0.0140512	-2.25941	down
mws0712	C5H9NO3	N-Propionylglycine	Amino acids and derivatives	1.1647	0.0017346	-16.3874	down
mws0227	C6H13NO2	L-Leucine*	Amino acids and derivatives	1.16194	0.00593555	2.87037	up
mws0258	C6H13NO2	L-Isoleucine*	Amino acids and derivatives	1.16241	0.00557306	2.94363	up
mws1587	C6H13NO2	L-Norleucine*	Amino acids and derivatives	1.15403	0.00997441	2.28616	up
mws0001	C4H8N2O3	L-Asparagine	Amino acids and derivatives	1.12434	0.0410207	2.53351	up
pme0057	C4H9NO2S	L-Homocysteine	Amino acids and derivatives	1.08753	0.00679071	-1.45777	down
pme1002	C8H11NO	L-Tyramine	Amino acids and derivatives	1.16233	0.00060412	-3.00524	down
Rfmb320	C7H13NO2	1-Methylpiperidine-2-carboxylic acid	Amino acids and derivatives	1.12065	0.0010688	-1.12693	down
mws0340	C6H8O4	2,3-Dimethylsuccinic acid	Amino acids and derivatives	1.14842	0.00545651	-3.91865	down
Lmqp000427	C6H11NO3	N-Methyl-Trans-4-Hydroxy-L-Proline	Amino acids and derivatives	1.11937	0.030263	-1.21172	down
pme0193	C5H10N2O3	L-Glutamine	Amino acids and derivatives	1.155	0.00675505	1.44962	up
pme0026	C6H14N2O2	L-Lysine	Amino acids and derivatives	1.15581	0.000488654	1.79585	up
mws1050	C5H9NO4	O-Acetylserine	Amino acids and derivatives	1.16267	0.00207528	-2.2143	down
Zmzn000113	C5H9NO4	L-threo-3-Methylaspartate	Amino acids and derivatives	1.08163	0.0866987	1.81677	up
pme1210	C5H11NO2S	L-Methionine	Amino acids and derivatives	1.16163	0.00173322	4.49613	up
mws0254	C6H9N3O2	L-Histidine	Amino acids and derivatives	1.16436	0.000475937	3.04233	up
pme0128	C6H12N2O3	L-Alanyl-L-Alanine	Amino acids and derivatives	1.09826	0.00188217	4.35051	up
mws1550	C6H11NO2S	S-Allyl-L-cysteine	Amino acids and derivatives	1.16151	0.00354998	3.991	up
pme2914	C6H10O5	3-Hydroxy-3-methylpentane-1,5-dioic acid	Amino acids and derivatives	1.14899	4.21166e-05	-2.82959	down
pme2758	C5H9NO5	4-Hydroxy-L-glutamic acid	Amino acids and derivatives	1.10133	0.0182809	1.24126	up
Lmbp000123	C6H13NO2S	L-Homomethionine	Amino acids and derivatives	1.12965	0.0346373	-1.72893	down
pme0253	C8H15NO3	N-Acetyl-L-leucine	Amino acids and derivatives	1.14216	0.0228372	3.14161	up
mws0260	C6H14N4O2	L-Arginine	Amino acids and derivatives	1.03734	0.0804252	-1.00751	down
pme2559	C6H9NO5	N-Acetyl-L-Aspartic Acid	Amino acids and derivatives	1.1422	0.0120979	2.43469	up
mws0875	C5H10N2O3S	L-Cysteinyl-L-glycine	Amino acids and derivatives	1.16453	0.00284895	-12.6952	down
mws0250	C9H11NO3	L-Tyrosine	Amino acids and derivatives	1.1322	0.00833646	1.35635	up
pme0075	C7H11NO5	N-Acetyl-L-glutamic acid	Amino acids and derivatives	1.12958	0.0119041	1.78505	up
pme0278	C7H14N2O4	2,6-Diaminooimelic acid	Amino acids and derivatives	1.16351	0.000628303	5.22958	up
pme2743	C10H11NO3	N-Phenylacetylglycine	Amino acids and derivatives	1.10167	0.0604087	-1.43451	down
mws5037	C9H18N2O3	L-Alanyl-L-leucine	Amino acids and derivatives	1.15232	0.00927729	-2.06069	down
NK10251888	C8H18N4O2	NG,NG-Dimethyl-L-arginine	Amino acids and derivatives	1.15303	0.00562347	1.70049	up
mws0282	C11H12N2O2	L-Tryptophan	Amino acids and derivatives	1.15321	0.0147252	2.29537	up
pme2566	C8H14N2O5	5-L-Glutamyl-L-amino acid	Amino acids and derivatives	1.06867	0.0572141	1.39623	up
Lmrj001698	C9H18N2O4	L-Seryl-L-Isoleucine	Amino acids and derivatives	1.1556	0.00706028	1.87689	up
mws0520	C11H13NO4	N-Acetyl-L-tyrosine	Amino acids and derivatives	1.1294	0.00904476	2.20442	up
Lmhp001670	C11H22N2O3	L-Valyl-L-Leucine	Amino acids and derivatives	1.15122	0.00485707	1.53309	up
Hmlp001371	C12H14N2O3	Cyclo(Tyr-Ala)	Amino acids and derivatives	1.16469	1.28531e-05	-9.79296	down
mws4176	C12H16N2O3	L-Alanyl-L-Phenylalanine	Amino acids and derivatives	1.14955	0.0123398	1.32306	up
Lmhp002031	C12H24N2O3	L-Leucyl-L-Leucine	Amino acids and derivatives	1.1462	0.00023122	1.09549	up
Lmhp002001	C14H20N2O3	L-Valyl-L-Phenylalanine	Amino acids and derivatives	1.14925	0.000302661	1.33679	up
pme2890	C8H16N2O4S2	L-Homocystine	Amino acids and derivatives	1.16193	0.0010007	-4.45404	down
pme1712	C11H20N2O6	L-Saccharopine	Amino acids and derivatives	1.09966	0.0571017	1.66802	up
mws0629	C13H16N2O5	L-Aspartyl-L-Phenylalanine	Amino acids and derivatives	1.10883	0.006181	-1.05646	down
pme1086	C10H17N3O6S	Glutathione reduced form	Amino acids and derivatives	1.15782	0.000338615	2.36616	up
pmb2855	C11H20N2O8	L-Glutamine-O-glycoside	Amino acids and derivatives	1.14516	0.0100563	3.74296	up
pmb2857	C11H19NO9	L-Glutamic acid-O-glycoside	Amino acids and derivatives	1.08017	0.0927484	1.96115	up
mws0582	C11H19N3O6S	S-(Methyl)glutathione	Amino acids and derivatives	1.16153	0.000129389	-4.40325	down
pme1286	C14H20N6O5S	S-(5'-Adenosy)-L-homocysteine	Amino acids and derivatives	1.15204	0.032014	3.4688	up
pmb0464	C16H27NO14	L-Aspartic acid-O-diglucoside	Amino acids and derivatives	1.15018	0.000580776	1.45886	up
mws4134	C20H32N6O12S2	Oxiglutatione	Amino acids and derivatives	1.14108	0.000505045	1.72248	up
pmb0302	C2H8NO3P	2-Aminoethylphosphonate	Lipids	1.16379	0.0212474	-10.6285	down
Hmsn000210	C17H30O2	Methyl 7,10-hexadecadienoate	Lipids	1.13971	0.000677113	-1.26006	down
Lmbn005923	C18H30O2	Crepenynic acid	Lipids	1.15053	0.0103459	1.0824	up
YC512118	C18H35NO	Oleamide (9-Octadecenamide)	Lipids	1.13136	0.0233562	-1.81346	down
Lmyn007883	C16H32O4	9,16-Dihydroxypalmitic acid	Lipids	1.0298	0.00714622	-2.06759	down
Zmyn004548	C18H28O3	12-Oxo-phytodienoic acid	Lipids	1.06097	0.0123984	1.48363	up
pmb2786	C18H30O3	9-Hydroxy-10,12,15-octadecatrienoic acid	Lipids	1.03019	0.0700597	1.34397	up
pmf0297	C20H42O	1-Eicosanol	Lipids	1.1199	0.0237914	-1.0196	down
ML10195036	C18H37NO2	3-Dehydrosphinganine	Lipids	1.11487	0.0269407	-1.5169	down
pmb2221	C18H39NO3	4-Hydroxysphinganine	Lipids	1.07988	0.00703992	-1.20154	down
Lmhp011562	C21H36O4	1-α-Linolenoyl-glycerol	Lipids	1.16116	0.00187792	2.40342	up
Lmhp112042	C21H38O4	1-Linoleoylglycerol	Lipids	1.14082	0.0249737	2.03887	up
pmb0296	C21H40O4	1-Oleoyl-Sn-Glycerol	Lipids	1.0959	0.0625399	1.20982	up
Cmbp005948	C21H20O8	1-O-p-Hydroxycinnamoyl-3-O-caffeoylglycerol	Lipids	1.1633	0.0182071	-8.69933	down
pmb2165	C18H38NO7P	LysoPC 10:0	Lipids	1.16334	0.0157709	-8.08636	down
pmb0862	C20H42NO7P	LysoPC 12:0	Lipids	1.08134	0.0143054	1.1704	up
Lmhp007836	C21H38NO7P	LysoPE 16:3	Lipids	1.16003	0.0410941	7.39371	up
Lmhp009464	C22H44NO7P	LysoPE 17:1	Lipids	1.11276	0.0253105	-1.10799	down
Lmhp010162	C22H46NO7P	LysoPE 17:0	Lipids	1.03167	0.0130347	-1.31035	down
Lmhp008589	C23H42NO7P	LysoPE 18:3	Lipids	1.15763	0.00805496	2.6826	up
pmb2260	C23H46NO7P	LysoPC 15:1	Lipids	1.11994	0.0198712	-1.05242	down
pmb0863	C24H46NO7P	LysoPC 16:2	Lipids	1.12615	0.0072741	-1.26652	down
pmd0132	C24H50NO7P	LysoPC 16:0	Lipids	1.09655	0.0121843	-1.40335	down
Lmhp010514	C25H48NO7P	LysoPE 20:2	Lipids	1.13754	0.00875607	-1.7977	down
Lmhp009590	C25H50NO7P	LysoPC 17:1	Lipids	1.12751	0.00775083	-1.26016	down
Lmhp010515	C25H52NO7P	LysoPC 17:0	Lipids	1.00473	0.0316111	-1.02632	down
Lmhp009773	C27H46O9	1-α-Linolenoyl-glycerol-3-O-glucoside	Lipids	1.13856	0.0159247	-1.89969	down
Lmhp010573	C27H48O9	1-Linoleoylglycerol-3-O-glucoside	Lipids	1.0539	0.00778552	-2.26298	down
pmb0865	C26H48NO7P	LysoPC 18:3	Lipids	1.13406	0.00506233	1.44066	up
mws0126	C26H54NO7P	LysoPC 18:0	Lipids	1.04622	0.0835225	1.1436	up
Lmhp007598	C27H52NO7P	LysoPC 19:2	Lipids	1.16193	0.00964785	-4.55264	down
Lmhp010908	C27H54NO7P	LysoPC 19:1	Lipids	1.0967	0.0541013	-1.13942	down
pmb2228	C27H56NO7P	LysoPC 19:0	Lipids	1.13657	0.0199969	-3.04111	down
pmd0146	C28H54NO7P	LysoPC 20:2	Lipids	1.10819	0.0140878	-1.33603	down
Lmhp011549	C28H56NO7P	LysoPC 20:1	Lipids	1.0441	0.0458657	-1.50204	down
pmd0143	C28H58NO7P	LysoPC 20:0	Lipids	1.16398	0.00546882	-6.65025	down
Lmxp010913	C35H66NO9P	1-(9Z-Octadecenoyl)-2-(9-oxo-nonanoyl)-sn-glycero-3-phosphocholine	Lipids	1.16353	0.0180611	-7.47948	down
Lmhp008744	C33H56O14	1-α-Linolenoyl-glycerol-2,3-di-O-glucoside	Lipids	1.02784	0.0133808	-2.06451	down
Lmhp009384	C33H58O14	1-Linoleoylglycerol-2,3-di-O-glucoside	Lipids	1.07316	0.0916917	-2.09216	down
pme3200	C2H7N3	1-methylguanidine	Nucleotides and derivatives	1.16456	0.00521289	-10.862	down
pme0257	C4H4N2O2	Uracil	Nucleotides and derivatives	1.07944	0.00450548	1.05693	up
mws0572	C5H7N3O	5-Methylcytosine	Nucleotides and derivatives	1.04265	0.0590107	1.10825	up
pme0040	C5H5N5	Adenine	Nucleotides and derivatives	1.16238	0.0101525	4.65268	up
pmb0374	C5H5N5	2-Aminopurine	Nucleotides and derivatives	1.16433	0.0122241	-10.6049	down
pme0033	C5H4N4O	Hypoxanthine	Nucleotides and derivatives	1.16436	0.0131865	11.3386	up
mws0847	C6H7N5	1-Methyladenine	Nucleotides and derivatives	1.16289	0.00558865	4.92334	up
pme1109	C5H5N5O	Guanine*	Nucleotides and derivatives	1.15894	0.0242651	4.00138	up
pme0183	C5H5N5O	Isoguanine*	Nucleotides and derivatives	1.16168	0.0102081	3.30575	up
pme0256	C5H4N4O2	Xanthine	Nucleotides and derivatives	1.1545	0.00950276	2.9518	up
pme2060	C10H13N5	N6-Isopentenyladenine	Nucleotides and derivatives	1.15996	0.00471701	3.91948	up
pme1194	C9H13N3O4	2'-Deoxycytidine	Nucleotides and derivatives	1.04881	0.00835508	-1.27445	down
HJAP106	C12H11N5O	N6-(4-hydroxybenzyl)adnine riboside	Nucleotides and derivatives	1.16461	0.0017028	-10.7964	down
mws0248	C9H12N2O6	Uridine	Nucleotides and derivatives	1.13179	0.0345085	3.12593	up
mws0976	C9H12N2O6	β-Pseudouridine	Nucleotides and derivatives	1.13638	0.00889489	1.17762	up
pme1184	C10H13N5O4	2'-Deoxyguanosine	Nucleotides and derivatives	1.16014	0.00403164	2.95477	up
mws1060	C10H12N4O5	9-(Arabinosyl)hypoxanthine	Nucleotides and derivatives	1.14746	0.00917073	3.26349	up
Hmhp001812	C11H15N5O4	2'-O-Methyladenosine	Nucleotides and derivatives	1.15448	0.01176	1.98903	up
pme1178	C10H13N5O5	Guanosine	Nucleotides and derivatives	1.16263	0.00179196	2.39427	up
mws0668	C10H12N4O6	Xanthosine	Nucleotides and derivatives	1.15597	0.00027646	1.94576	up
Lmqp000329	C8H14N3O7P	5-Aminoimidazole ribonucleotide	Nucleotides and derivatives	1.16048	0.00805915	-2.80251	down
pmb0197	C11H15N5O5	N7-Methylguanosine	Nucleotides and derivatives	1.15148	0.026491	3.38494	up
Lmcp002302	C12H17N5O5	N6-(2-Hydroxyethyl)adenosine	Nucleotides and derivatives	1.1629	0.00782635	4.37818	up
pme3967	C12H17N5O5	2-(Dimethylamino)guanosine	Nucleotides and derivatives	1.16355	0.00405159	4.2853	up
pme3188	C9H13N2O9P	Uridine 5'-monophosphate	Nucleotides and derivatives	1.16166	1.6787e-05	2.54462	up
pme3184	C10H14N5O6P	2'-Deoxyadenosine-5'-monophosphate	Nucleotides and derivatives	1.1585	0.0113105	3.60191	up
mws0675	C11H15N2O8P	β-Nicotinamide mononucleotide	Nucleotides and derivatives	1.07409	0.0584459	1.00657	up
mws0609	C10H12N5O7P	Guanosine 3',5'-cyclic monophosphate	Nucleotides and derivatives	1.15275	0.0178265	4.72005	up
pmb0981	C10H14N5O7P	Adenosine 5'-monophosphate	Nucleotides and derivatives	1.15793	0.00247621	4.19428	up
pmb0532	C10H13N4O8P	Inosine 5'-monophosphate	Nucleotides and derivatives	1.14848	0.00683723	4.26135	up
pmb0998	C10H14N5O8P	Guanosine 5'-monophosphate	Nucleotides and derivatives	1.15131	0.0131713	2.11515	up
pmb0964	C16H23N5O5	Isopentenyladenine-7-N-glucoside	Nucleotides and derivatives	1.16458	0.00462755	-14.6447	down
pme3337	C14H17N5O8	Succinyladenosine	Nucleotides and derivatives	1.16083	0.0165708	4.27034	up
pme3007	C9H14N2O12P2	Uridine 5'-diphosphate	Nucleotides and derivatives	1.16465	0.00183755	-13.5852	down
pme2117	C10H15N5O10P2	Adenosine 5'-diphosphate	Nucleotides and derivatives	1.16225	0.00493306	2.95743	up
Zmfn000481	C14H22N2O16P2	Uridine-5'-Diphosphate-D-Xylose	Nucleotides and derivatives	1.1452	8.99721e-05	1.84311	up
pmb0530	C21H27N7O14P2	Nicotinic acid adenine dinucleotide	Nucleotides and derivatives	1.15894	0.00420697	3.30392	up
pme2651	C21H28N7O17P3	NADP (Nicotinamide adenine dinucleotide phosphate)	Nucleotides and derivatives	1.10198	0.00571222	1.72205	up
Lmqp000873	C4H4O3	Succinic anhydride	Organic acids	1.15691	0.00293059	-1.78307	down
pme3011	C4H9NO2	γ-Aminobutyric acid	Organic acids	1.14748	0.00158844	2.06083	up
mws0206	C4H8O3	2-Hydroxybutyric Acid	Organic acids	1.1483	0.000238064	2.83503	up
pme1975	C3H4O4	Malonic acid	Organic acids	1.15324	0.0039085	1.47458	up
mws0376	C4H4O4	Fumaric acid	Organic acids	1.16459	0.00397772	15.1081	up
pme2935	C5H8O3	2-Oxovaleric acid	Organic acids	1.16428	0.00596958	-9.32338	down
mws0192	C4H6O4	Succinic acid	Organic acids	1.14445	0.000352416	-1.24871	down
mws0470	C4H6O4	Methylmalonic acid	Organic acids	1.14355	0.000176735	-1.32053	down
mws0147	C5H10O3	β-Hydroxyisovaleric acid	Organic acids	1.14376	0.0166528	1.70663	up
pme3096	C3H5NO4	Aminomalonic acid	Organic acids	1.15044	0.00018856	-1.17003	down
Lmbp000668	C6H5NO2	Isonicotinic acid*	Organic acids	1.15804	0.0143656	2.84366	up
Zmpn000638	C4H9N3O2	3-Guanidinopropionic acid	Organic acids	1.14969	0.00434223	2.04083	up
pme0274	C6H13NO2	6-Aminocaproic acid	Organic acids	1.16291	0.00382325	2.95073	up
pme0243	C5H8O4	Glutaric acid	Organic acids	1.15808	2.8195e-05	2.00107	up
pme3034	C5H8O4	Ethylmalonic acid	Organic acids	1.13311	0.00132349	1.36147	up
Lmgn000160	C4H8N2O3	3-Ureidopropionic Acid	Organic acids	1.1432	0.0199565	3.39328	up
mws0275	C4H6O5	L-Malic acid	Organic acids	1.14746	0.000709562	-1.33469	down
Lmbn000198	C4H6O5	3-Dehydro-L-Threonic Acid	Organic acids	1.13962	0.00742391	-1.2902	down
mws0336	C6H6N2O2	Urocanic acid	Organic acids	1.16376	0.0226812	-13.8564	down
pme3207	C6H6O4	Muconic acid	Organic acids	1.05123	0.0655912	1.07688	up
pme0295	C6H11NO3	4-Acetamidobutyric acid	Organic acids	1.14488	0.000230196	3.01607	up
pme2380	C5H6O5	α-Ketoglutaric acid	Organic acids	1.1565	3.68477e-05	-6.1825	down
Wmzn000227	C6H10O4	2,2-Dimethylsuccinic acid	Organic acids	1.07448	0.0747244	1.83552	up
pme3154	C6H12O4	Mevalonic acid	Organic acids	1.15909	0.00159844	-3.73588	down
mws0262	C4H6O6	L-Tartaric acid	Organic acids	1.1647	0.00164775	-13.8955	down
pmf0420	C9H10O2	Benzyl acetate	Organic acids	1.09303	0.00821417	1.47784	up
mws0639	C7H6O4	2,3-Dihydroxybenzoic Acid	Organic acids	1.15712	0.0118964	-3.73941	down
Lmbn001467	C7H13NO3	5-Acetamidopentanoic Acid	Organic acids	1.15949	0.00840728	2.29153	up
Lmmn001643	C9H8O3	2-Hydroxycinnamic acid	Organic acids	1.15823	0.00141219	-2.9189	down
mws0344	C5H10O6	D-Xylonic acid	Organic acids	1.16187	0.0140685	5.09737	up
mws2125	C3H5O6P	Phosphoenolpyruvate	Organic acids	1.15423	0.000524328	-2.3009	down
ML10176345	C7H8O5	3-Dehydroshikimic acid	Organic acids	1.16399	0.0178096	-12.7992	down
mws0154	C7H10O5	Shikimic acid	Organic acids	1.15005	0.0155752	-3.46782	down
Zmgn001448	C7H12O5	2-Propylmalic Acid*	Organic acids	1.16461	0.00422599	-12.3533	down
pmb3101	C7H12O5	2-Isopropylmalic Acid*	Organic acids	1.13589	0.000191503	-2.88611	down
Zmyn000453	C6H8O7	Isocitric Acid*	Organic acids	1.16447	0.000389479	-2.60013	down
mws0277	C7H12O6	Quinic Acid	Organic acids	1.16418	0.000950793	-2.61365	down
mws1189	C6H10O7	D-Galacturonic acid*	Organic acids	1.1225	0.033872	1.35366	up
pme1654	C12H18O3	Jasmonic acid	Organic acids	1.1499	0.00217945	-3.21657	down
Lmtn004049	C15H20O4	Abscisic acid	Organic acids	1.15934	0.00233	-2.14476	down
pme2074	C18H29NO4	(-)-Jasmonoyl-L-Isoleucine	Organic acids	1.16434	0.00492624	-10.1046	down
mws0889	C4H8O5	D-Threonic Acid	Saccharides and Alcohols	1.15461	0.0142466	2.65062	up
ML10171848	C5H8O5	D-Arabinono-1,4-lactone	Saccharides and Alcohols	1.16435	0.000983222	-3.95039	down
mws0854	C6H12O5	Rhamnose	Saccharides and Alcohols	1.11929	0.0494145	1.64631	up
pme2435	C6H12O5	L-Fucose	Saccharides and Alcohols	1.05117	0.0688274	1.17501	up
Zmzn000078	C3H7O6P	Dihydroxyacetone phosphate	Saccharides and Alcohols	1.14318	0.000197825	-1.32852	down
mws4175	C6H8O6	D-Glucurono-6,3-lactone	Saccharides and Alcohols	1.15385	0.0033242	3.82156	up
mws1164	C6H12O6	D-Fructose*	Saccharides and Alcohols	1.15229	0.00186118	1.23187	up
Hmln000297	C6H12O6	Inositol*	Saccharides and Alcohols	1.13688	0.000498188	1.07466	up
mws4170	C6H12O6	D-Glucose*	Saccharides and Alcohols	1.15141	0.00850307	1.13891	up
pmf0139	C6H12O6	D-Galactose*	Saccharides and Alcohols	1.09464	0.0109764	1.01029	up
pmf0138	C6H12O6	D-Mannose*	Saccharides and Alcohols	1.13506	0.011776	1.09945	up
pme2237	C6H14O6	Dulcitol*	Saccharides and Alcohols	1.12402	0.0139239	2.22896	up
mws0214	C6H14O6	D-Sorbitol*	Saccharides and Alcohols	1.13818	0.00124465	1.81323	up
pme3705	C6H10O7	D-Glucoronic acid*	Saccharides and Alcohols	1.09648	0.00316565	1.14514	up
pme0534	C6H12O7	Gluconic acid	Saccharides and Alcohols	1.1616	0.00212267	3.55122	up
pme1261	C9H19NO4	D-Panthenol	Saccharides and Alcohols	1.05495	0.166355	2.57522	up
Zmpn000199	C6H10O8	D-Galactaric acid*	Saccharides and Alcohols	1.15854	0.0186358	4.5336	up
Zmjn000425	C12H22O11	D-Lactulose*	Saccharides and Alcohols	1.16386	0.0279863	-14.4513	down
Lmmn000214	C18H32O15	Solatriose	Saccharides and Alcohols	1.14158	0.0101118	2.28116	up
pme0490	C6H5NO2	Nicotinic acid (Vitamin B3)*	Vitamin	1.15964	0.00814602	2.66723	up
pme2165	C5H4N2O4	Orotic acid	Vitamin	1.16413	0.0130297	10.9422	up
pme1383	C8H11NO3	Pyridoxine	Vitamin	1.15221	0.0145657	2.10395	up
MA10039492	C6H6O6	Dehydroascorbic acid	Vitamin	1.15886	0.0101609	-2.9139	down
Hmfn000531	C6H8O6	L-Ascorbic acid (Vitamin C)	Vitamin	1.15741	0.000839359	1.36614	up
pme2266	C10H16N2O3S	Biotin	Vitamin	1.16356	0.0157629	8.76909	up
pma3101	C11H14NO6+	Nicotinate D-ribonucleoside	Vitamin	1.16281	0.000848978	2.52075	up
pma1751	C12H15NO7	N-(beta-D-Glucosyl)nicotinate	Vitamin	1.14472	0.00579596	1.16656	up
pme2289	C20H30O	Retinol (Vitamin A1)	Vitamin	1.16461	0.000522779	-9.19879	down
pmb0789	C14H21NO8	Pyridoxine-5'-O-glucoside	Vitamin	1.11681	0.0010535	2.40801	up
mws0232	C17H20N4O6	Riboflavin (Vitamin B2)	Vitamin	1.13172	0.00107452	1.043	up

## Sheet: Table S4
Table S4. List of DAMs between B8S1 and B8S5.
Index	Compounds	Class	VIP	p_value	Log2FC	Type
pme3033	N,N-Dimethylglycine	Amino acids and derivatives	1.17154	0.0147979	1.648	up
pme0006	L-Proline	Amino acids and derivatives	1.18507	0.00907647	1.22341	up
pme0120	5-Aminovaleric acid	Amino acids and derivatives	1.13254	0.00636601	1.2035	up
mws0263	5-Oxo-L-Proline	Amino acids and derivatives	1.18739	0.018207	2.77681	up
ML10181668	Cycloleucine	Amino acids and derivatives	1.16978	0.0238977	2.34413	up
Rfmb319	Pipecolic acid	Amino acids and derivatives	1.19477	1.35525e-05	-1.0524	down
mws0216	Trans-4-Hydroxy-L-proline	Amino acids and derivatives	1.08739	0.0546653	-1.94459	down
mws0712	N-Propionylglycine	Amino acids and derivatives	1.19315	0.000236276	-1.10918	down
mws0001	L-Asparagine	Amino acids and derivatives	1.17899	0.0154789	1.87496	up
mws0219	L-Aspartic Acid	Amino acids and derivatives	1.19346	0.00104006	2.32249	up
pme1002	L-Tyramine	Amino acids and derivatives	1.1973	0.000335529	-3.51364	down
mws0340	2,3-Dimethylsuccinic acid	Amino acids and derivatives	1.14203	0.000659647	-1.76563	down
pme0193	L-Glutamine	Amino acids and derivatives	1.1943	4.12029e-05	1.23975	up
pme0026	L-Lysine	Amino acids and derivatives	1.18491	0.00877639	1.19989	up
mws1050	O-Acetylserine	Amino acids and derivatives	1.17011	0.000966508	-1.11682	down
Zmzn000113	L-threo-3-Methylaspartate	Amino acids and derivatives	1.19586	0.00362387	2.58043	up
pme0014	L-Glutamic acid	Amino acids and derivatives	1.18459	0.0149138	1.65347	up
pme1210	L-Methionine	Amino acids and derivatives	1.19745	0.00101142	3.18681	up
mws0254	L-Histidine	Amino acids and derivatives	1.19152	0.000133099	1.46523	up
pme0128	L-Alanyl-L-Alanine	Amino acids and derivatives	1.18206	0.108542	9.5202	up
mws1550	S-Allyl-L-cysteine	Amino acids and derivatives	1.19536	0.000580663	3.24858	up
pme2758	4-Hydroxy-L-glutamic acid	Amino acids and derivatives	1.13612	0.0361949	2.18351	up
pme0253	N-Acetyl-L-leucine	Amino acids and derivatives	1.19392	0.0444748	-9.37283	down
mws0875	L-Cysteinyl-L-glycine	Amino acids and derivatives	1.13045	0.0128484	-1.2631	down
pme0137	N-Acetyl-L-Glutamine	Amino acids and derivatives	1.17943	0.000436894	-1.52158	down
mws5041	L-Glycyl-L-isoleucine*	Amino acids and derivatives	1.17808	0.00135247	-1.17065	down
pme0278	2,6-Diaminooimelic acid	Amino acids and derivatives	1.19652	0.0036613	4.14427	up
pme2743	N-Phenylacetylglycine	Amino acids and derivatives	1.12793	0.0338877	1.1294	up
mws5037	L-Alanyl-L-leucine	Amino acids and derivatives	1.19649	0.00102794	-1.51799	down
Zmgn002106	N-Acetyl-L-phenylalanine	Amino acids and derivatives	1.19746	0.00810422	-9.11272	down
mws5042	L-Glycyl-L-phenylalanine	Amino acids and derivatives	1.19002	0.000540818	-1.44386	down
pme2563	γ-Glu-Cys	Amino acids and derivatives	1.11539	0.0157463	-1.76286	down
Lmhp002001	L-Valyl-L-Phenylalanine	Amino acids and derivatives	1.19123	2.48427e-05	1.12266	up
pme2890	L-Homocystine	Amino acids and derivatives	1.18612	0.00404601	-3.05262	down
Lmrj002793	Cyclo(Phe-Glu)	Amino acids and derivatives	1.14868	0.013867	2.05859	up
mws0629	L-Aspartyl-L-Phenylalanine	Amino acids and derivatives	1.19552	0.000837724	-1.82755	down
pmb2855	L-Glutamine-O-glycoside	Amino acids and derivatives	1.18104	0.0377995	3.79151	up
pmb2857	L-Glutamic acid-O-glycoside	Amino acids and derivatives	1.18584	0.0340317	3.8929	up
mws0582	S-(Methyl)glutathione	Amino acids and derivatives	1.10494	0.0357606	1.07731	up
pmb0464	L-Aspartic acid-O-diglucoside	Amino acids and derivatives	1.15559	0.00121344	1.09341	up
pmb0302	2-Aminoethylphosphonate	Lipids	1.19771	0.00458572	-10.2218	down
mws0367	α-Linolenic Acid*	Lipids	1.19705	0.000636705	1.87567	up
mws0366	γ-Linolenic Acid*	Lipids	1.19461	2.45926e-05	1.88028	up
Lmbn005923	Crepenynic acid	Lipids	1.19627	0.000313309	2.65272	up
Lmyn007883	9,16-Dihydroxypalmitic acid	Lipids	1.18849	0.00215516	-2.16129	down
Zmyn004714	Ricinoleic acid	Lipids	1.19322	6.8658e-05	-1.86577	down
pmf0297	1-Eicosanol	Lipids	1.19089	5.76315e-05	-1.78261	down
pmn001610	Eicosadienoic acid	Lipids	1.19245	1.25799e-05	-1.27218	down
Lmhp011562	1-α-Linolenoyl-glycerol	Lipids	1.19625	3.04081e-05	1.25586	up
Cmbp005948	1-O-p-Hydroxycinnamoyl-3-O-caffeoylglycerol	Lipids	1.18024	0.0239728	-2.37146	down
pmd0153	LysoPA 16:0	Lipids	1.19722	0.01411	11.4477	up
pmb2165	LysoPC 10:0	Lipids	1.01581	0.0144072	1.13711	up
Lmhp008273	LysoPE 15:1	Lipids	1.17178	0.0136016	1.27475	up
Lmhp007836	LysoPE 16:3	Lipids	1.17335	0.000252953	2.82584	up
Lmhp008763	LysoPE 16:1	Lipids	1.19526	0.00229439	2.07138	up
Lmhp010162	LysoPE 17:0	Lipids	1.1274	0.0166918	-1.09702	down
Lmhp008589	LysoPE 18:3	Lipids	1.19466	0.0014266	1.98053	up
Lmhp008833	LysoPC 16:1	Lipids	1.18897	0.00285169	1.25353	up
Lmhp008688	LysoPE 20:5	Lipids	1.19634	0.0318059	-10.064	down
Lmhp009802	LysoPE 20:3	Lipids	1.179	0.0125484	-1.07769	down
Lmhp010514	LysoPE 20:2	Lipids	1.19192	0.000256844	-1.14886	down
Lmhp010573	1-Linoleoylglycerol-3-O-glucoside	Lipids	1.1954	0.0316896	-7.67651	down
pmb0865	LysoPC 18:3	Lipids	1.17419	0.0219156	1.47671	up
Lmhp010908	LysoPC 19:1	Lipids	1.0982	0.00882184	-1.18065	down
Lmhp008742	LysoPC 20:5	Lipids	1.19745	0.0103902	-11.0961	down
pmd0143	LysoPC 20:0	Lipids	1.1834	0.0130326	-2.25928	down
Lmxp010913	1-(9Z-Octadecenoyl)-2-(9-oxo-nonanoyl)-sn-glycero-3-phosphocholine	Lipids	1.19791	0.000654602	-10.031	down
Lmhp008744	1-α-Linolenoyl-glycerol-2,3-di-O-glucoside	Lipids	1.08069	0.0155655	-1.33654	down
pme0040	Adenine	Nucleotides and derivatives	1.19435	0.00115424	2.91429	up
mws0847	1-Methyladenine	Nucleotides and derivatives	1.1938	0.000231463	3.13946	up
pme0183	Isoguanine*	Nucleotides and derivatives	1.1761	0.00157232	1.45442	up
pme1194	2'-Deoxycytidine	Nucleotides and derivatives	1.19443	0.000327438	-1.12332	down
pme0264	Thymidine	Nucleotides and derivatives	1.18209	0.00110012	1.50092	up
pme0230	Adenosine	Nucleotides and derivatives	1.11567	0.0126902	-1.22225	down
pme1184	2'-Deoxyguanosine	Nucleotides and derivatives	1.18257	0.00287977	1.02867	up
Lmqp000329	5-Aminoimidazole ribonucleotide	Nucleotides and derivatives	1.16359	0.0133389	-1.09683	down
pmb0197	N7-Methylguanosine	Nucleotides and derivatives	1.1232	0.00944269	1.30101	up
Lmcp002302	N6-(2-Hydroxyethyl)adenosine	Nucleotides and derivatives	1.19583	0.00220129	1.96689	up
pme3967	2-(Dimethylamino)guanosine	Nucleotides and derivatives	1.19532	0.00234762	1.94519	up
pmc0066	2'-Deoxyinosine-5'-monophosphate	Nucleotides and derivatives	1.16035	0.0288274	1.2473	up
mws0609	Guanosine 3',5'-cyclic monophosphate	Nucleotides and derivatives	1.16687	0.04558	2.47005	up
pmb0981	Adenosine 5'-monophosphate	Nucleotides and derivatives	1.14294	0.0291944	1.79443	up
pmb0532	Inosine 5'-monophosphate	Nucleotides and derivatives	1.14341	0.0134236	1.68747	up
pmb0998	Guanosine 5'-monophosphate	Nucleotides and derivatives	1.06304	0.0814485	1.03891	up
pme3337	Succinyladenosine	Nucleotides and derivatives	1.19512	0.00140811	1.40436	up
pme2651	NADP (Nicotinamide adenine dinucleotide phosphate)	Nucleotides and derivatives	1.15053	0.0178944	1.15429	up
Lmqp000873	Succinic anhydride	Organic acids	1.19659	0.000252034	-2.64035	down
mws4052	1-Aminocyclopropane-1-carboxylic acid	Organic acids	1.12761	0.026101	1.10185	up
Lmgn000219	Succinic semialdehyde	Organic acids	1.10683	0.00430054	1.1526	up
pme3011	γ-Aminobutyric acid	Organic acids	1.17892	0.00717775	1.75123	up
pme1975	Malonic acid	Organic acids	1.18189	0.00620185	1.1165	up
pme2935	2-Oxovaleric acid	Organic acids	1.1737	0.115781	7.63496	up
mws0192	Succinic acid	Organic acids	1.1943	0.000584947	-2.38999	down
mws0470	Methylmalonic acid	Organic acids	1.19384	5.59056e-06	-2.38595	down
pme3096	Aminomalonic acid	Organic acids	1.19522	9.44897e-07	-2.32221	down
Lmgp002593	3-hydroxybenzaldehyde	Organic acids	1.17474	0.00662672	-1.2503	down
Lmbp000668	Isonicotinic acid*	Organic acids	1.1107	0.00970601	-1.39198	down
mws0236	2-Aminoethanesulfonic acid	Organic acids	1.07405	0.0781249	1.12994	up
Zmpn000638	3-Guanidinopropionic acid	Organic acids	1.16648	0.0147958	1.21901	up
pme0243	Glutaric acid	Organic acids	1.19772	3.67845e-07	1.61037	up
pme3034	Ethylmalonic acid	Organic acids	1.19074	1.83529e-05	1.67704	up
Lmgn000160	3-Ureidopropionic Acid	Organic acids	1.17046	0.0546958	2.67374	up
mws0336	Urocanic acid	Organic acids	1.16766	7.05863e-05	-2.97635	down
pme3207	Muconic acid	Organic acids	1.12544	0.00687449	1.30496	up
pme0295	4-Acetamidobutyric acid	Organic acids	1.17497	0.0373522	2.80403	up
pme2380	α-Ketoglutaric acid	Organic acids	1.1896	0.00865115	-3.02661	down
Wmzn000227	2,2-Dimethylsuccinic acid	Organic acids	1.16258	0.0282592	2.04827	up
Lmbn001676	3-Hydroxy-3-Methyl-2-Oxopentanoic Acid	Organic acids	1.18436	0.000248757	-1.04701	down
mws0639	2,3-Dihydroxybenzoic Acid	Organic acids	1.18473	7.2911e-06	-3.1725	down
Lmmn001643	2-Hydroxycinnamic acid	Organic acids	1.14933	0.00162164	-1.55166	down
pme0282	Phthalic acid	Organic acids	1.18589	0.000679103	-1.158	down
mws0344	D-Xylonic acid	Organic acids	1.19514	5.99408e-06	1.49582	up
Xmbp001692	2,4,6-Trihydroxybenzoic acid	Organic acids	1.17977	0.000350405	-1.91468	down
mws0154	Shikimic acid	Organic acids	1.18608	3.36957e-06	-3.32471	down
Zmgn001448	2-Propylmalic Acid*	Organic acids	1.19543	0.000595457	-3.7909	down
pmb3101	2-Isopropylmalic Acid*	Organic acids	1.19508	0.000259618	-3.83281	down
pme1654	Jasmonic acid	Organic acids	1.19682	0.000581826	-4.41919	down
Lmtn004049	Abscisic acid	Organic acids	1.19671	4.48806e-05	1.05178	up
Lmmn003323	2-Hydroxyhexadecanoic acid	Organic acids	1.19003	3.72161e-05	-1.07902	down
pme2074	(-)-Jasmonoyl-L-Isoleucine	Organic acids	1.19792	0.000350913	-10.1102	down
pma0134	D-(-)-Threose	Saccharides and Alcohols	1.14787	0.00280377	-2.60714	down
mws0889	D-Threonic Acid	Saccharides and Alcohols	1.0973	0.0757321	1.23713	up
mws1499	D-Arabinose	Saccharides and Alcohols	1.12377	0.00524382	1.37561	up
mws0854	Rhamnose	Saccharides and Alcohols	1.1921	0.0966681	11.405	up
pme2529	1,5-Anhydro-D-glucitol	Saccharides and Alcohols	1.16558	0.00197943	-1.22158	down
mws1164	D-Fructose*	Saccharides and Alcohols	1.11567	0.00421208	1.05649	up
mws4170	D-Glucose*	Saccharides and Alcohols	1.09775	0.00751988	1.1278	up
mws2104	D-Pinitol	Saccharides and Alcohols	1.09626	0.050674	-1.34259	down
pme0534	Gluconic acid	Saccharides and Alcohols	1.19527	0.00103972	1.05159	up
Zmzn000079	D-Erythrose-4-phosphate	Saccharides and Alcohols	1.14082	0.00108294	-1.32466	down
pme1261	D-Panthenol	Saccharides and Alcohols	1.12578	0.0020934	1.26473	up
Zmyn000108	D-Saccharic acid*	Saccharides and Alcohols	1.1891	0.00252887	-1.22424	down
mws1090	Glucose-1-phosphate*	Saccharides and Alcohols	1.17637	0.000361103	-1.12452	down
pme3313	D-Fructose 6-phosphate*	Saccharides and Alcohols	1.17539	0.000446846	-1.08901	down
Zmjn000425	D-Lactulose*	Saccharides and Alcohols	1.15204	0.0261455	1.90473	up
Lmmn000214	Solatriose	Saccharides and Alcohols	1.15106	0.068083	2.33765	up
pme2125	Raffinose*	Saccharides and Alcohols	1.12043	0.0402694	1.88899	up
mws1589	D-Panose*	Saccharides and Alcohols	1.15023	0.0089766	2.85775	up
Hmqp000191	Planteose*	Saccharides and Alcohols	1.13304	0.0233206	1.08272	up
pmb2653	D(+)-Melezitose O-rhamnoside	Saccharides and Alcohols	1.14184	0.0437346	2.66486	up
pme1383	Pyridoxine	Vitamin	1.17973	0.0111086	1.19888	up
MA10039492	Dehydroascorbic acid	Vitamin	1.18503	2.89506e-05	-3.57789	down
Hmfn000531	L-Ascorbic acid (Vitamin C)	Vitamin	1.19155	0.00358758	-2.02771	down
mws1337	D-Pantothenic Acid	Vitamin	1.18097	0.0281701	2.50963	up
pma3101	Nicotinate D-ribonucleoside	Vitamin	1.19399	0.000379859	1.48944	up
pma1751	N-(beta-D-Glucosyl)nicotinate	Vitamin	1.19715	1.42383e-05	-2.83578	down
pme2289	Retinol (Vitamin A1)	Vitamin	1.18575	0.0114915	-2.63156	down
pme3511	Orotidine	Vitamin	1.12442	0.00559711	-1.10739	down

## Sheet: Table S5
Table S5. List of DAMs between HZ and B8 at S5.
Index	Compounds	Class	VIP	Log2FC	Type
pme3033	N,N-Dimethylglycine	Amino acids and derivatives	1.23526	-2.8043	down
pme3017	2-Aminoisobutyric acid	Amino acids and derivatives	1.24203	-3.14692	down
pme0010	L-Serine	Amino acids and derivatives	1.19062	-1.42545	down
pme2122	Histamine	Amino acids and derivatives	1.22145	1.55534	up
pme0006	L-Proline	Amino acids and derivatives	1.22463	-1.20511	down
mws0263	5-Oxo-L-Proline	Amino acids and derivatives	1.2325	3.19961	up
Rfmb319	Pipecolic acid	Amino acids and derivatives	1.22964	1.27636	up
mws0712	N-Propionylglycine	Amino acids and derivatives	1.24288	15.2182	up
mws0227	L-Leucine*	Amino acids and derivatives	1.23839	-2.41761	down
mws0258	L-Isoleucine*	Amino acids and derivatives	1.23883	-2.43573	down
mws1587	L-Norleucine*	Amino acids and derivatives	1.21813	-1.33517	down
mws0219	L-Aspartic Acid	Amino acids and derivatives	1.23571	1.83034	up
Hmsp000364	L-Cyclopentylglycine	Amino acids and derivatives	1.24212	1.36399	up
mws0340	2,3-Dimethylsuccinic acid	Amino acids and derivatives	1.16955	2.32073	up
Lmqp000427	N-Methyl-Trans-4-Hydroxy-L-Proline	Amino acids and derivatives	1.23086	1.01294	up
pme0193	L-Glutamine	Amino acids and derivatives	1.22524	-1.0163	down
pme0026	L-Lysine	Amino acids and derivatives	1.22719	-1.23025	down
pme0014	L-Glutamic acid	Amino acids and derivatives	1.20666	1.73723	up
pme1210	L-Methionine	Amino acids and derivatives	1.23478	-1.26117	down
mws0254	L-Histidine	Amino acids and derivatives	1.24034	-1.51181	down
pme0128	L-Alanyl-L-Alanine	Amino acids and derivatives	1.13031	-2.97948	down
pme2914	3-Hydroxy-3-methylpentane-1,5-dioic acid	Amino acids and derivatives	1.18118	1.4413	up
Lmbp000123	L-Homomethionine	Amino acids and derivatives	1.23408	2.29602	up
pme0253	N-Acetyl-L-leucine	Amino acids and derivatives	1.2423	-13.321	down
mws0875	L-Cysteinyl-L-glycine	Amino acids and derivatives	1.24245	12.8067	up
mws0736	N-Glycyl-L-leucine*	Amino acids and derivatives	1.21684	-1.3712	down
pme0278	2,6-Diaminooimelic acid	Amino acids and derivatives	1.22972	-1.22767	down
pme2743	N-Phenylacetylglycine	Amino acids and derivatives	1.191	1.26966	up
Lmrj002244	Cyclo(Pro-Pro)	Amino acids and derivatives	1.24243	8.97833	up
mws5037	L-Alanyl-L-leucine	Amino acids and derivatives	1.23894	2.1246	up
mws0282	L-Tryptophan	Amino acids and derivatives	1.19789	-1.14398	down
Zmgn002106	N-Acetyl-L-phenylalanine	Amino acids and derivatives	1.242	-10.1517	down
Lmrj001698	L-Seryl-L-Isoleucine	Amino acids and derivatives	1.22251	-1.41808	down
pme1228	5-Hydroxy-L-tryptophan	Amino acids and derivatives	1.2428	11.1167	up
mws0520	N-Acetyl-L-tyrosine	Amino acids and derivatives	1.07378	-1.19271	down
Hmlp001371	Cyclo(Tyr-Ala)	Amino acids and derivatives	1.24141	8.53457	up
Lmrj002793	Cyclo(Phe-Glu)	Amino acids and derivatives	1.17622	1.75615	up
pme1712	L-Saccharopine	Amino acids and derivatives	1.17523	-1.65437	down
pme1086	Glutathione reduced form	Amino acids and derivatives	1.22668	1.06488	up
mws0582	S-(Methyl)glutathione	Amino acids and derivatives	1.23515	4.18967	up
pme1286	S-(5'-Adenosy)-L-homocysteine	Amino acids and derivatives	1.2211	-2.92253	down
pmb0464	L-Aspartic acid-O-diglucoside	Amino acids and derivatives	1.2407	-1.79029	down
mws0361	Palmitoleic Acid	Lipids	1.15415	-1.26731	down
Hmsn000210	Methyl 7,10-hexadecadienoate	Lipids	1.19903	1.16099	up
mws0383	10-Heptadecenoic Acid	Lipids	1.19275	-1.29773	down
pmb2786	9-Hydroxy-10,12,15-octadecatrienoic acid	Lipids	1.08927	-1.2223	down
Lmbn005443	13-KODE; (9Z,11E)-13-Oxooctadeca-9,11-dienoic acid	Lipids	1.0903	-1.17668	down
Lmhp011562	1-α-Linolenoyl-glycerol	Lipids	1.23401	-1.05118	down
Lmhp112042	1-Linoleoylglycerol	Lipids	1.22597	-2.38593	down
pmb0296	1-Oleoyl-Sn-Glycerol	Lipids	1.14188	-1.07661	down
Cmbp005948	1-O-p-Hydroxycinnamoyl-3-O-caffeoylglycerol	Lipids	1.24276	7.13579	up
pmd0153	LysoPA 16:0	Lipids	1.24229	11.4477	up
pmb2165	LysoPC 10:0	Lipids	1.24233	8.02881	up
Lmhp008885	LysoPE 15:0	Lipids	1.07211	-1.91863	down
Lmhp007836	LysoPE 16:3	Lipids	1.18941	2.21566	up
Lmhp008763	LysoPE 16:1	Lipids	1.23284	2.78175	up
Lmhp009129	LysoPC 15:0	Lipids	1.1405	-1.5215	down
pmb0863	LysoPC 16:2	Lipids	1.22276	1.64315	up
Lmhp008833	LysoPC 16:1	Lipids	1.23059	2.34023	up
Lmhp010514	LysoPE 20:2	Lipids	1.21554	1.39044	up
Lmhp010573	1-Linoleoylglycerol-3-O-glucoside	Lipids	1.22532	-7.08939	down
Lmhp007598	LysoPC 19:2	Lipids	1.2392	2.89642	up
Lmhp010908	LysoPC 19:1	Lipids	1.11454	1.11313	up
pmb2228	LysoPC 19:0	Lipids	1.21463	2.53737	up
pmd0146	LysoPC 20:2	Lipids	1.19771	1.11343	up
Lmhp011549	LysoPC 20:1	Lipids	1.14002	1.38873	up
pmd0143	LysoPC 20:0	Lipids	1.24239	7.50014	up
Lmhp009384	1-Linoleoylglycerol-2,3-di-O-glucoside	Lipids	1.01789	-1.39226	down
pme3200	1-methylguanidine	Nucleotides and derivatives	1.2408	9.55172	up
mws0255	Cytosine	Nucleotides and derivatives	1.21524	1.40749	up
pme0040	Adenine	Nucleotides and derivatives	1.21351	-1.36893	down
pmb0374	2-Aminopurine	Nucleotides and derivatives	1.24233	10.8591	up
pme0033	Hypoxanthine	Nucleotides and derivatives	1.12167	-1.05714	down
mws0847	1-Methyladenine	Nucleotides and derivatives	1.23115	-1.6095	down
pme1109	Guanine*	Nucleotides and derivatives	1.23148	-3.25376	down
pme0183	Isoguanine*	Nucleotides and derivatives	1.22306	-1.66559	down
pme0256	Xanthine	Nucleotides and derivatives	1.22176	-3.30515	down
pme2060	N6-Isopentenyladenine	Nucleotides and derivatives	1.11727	-1.88903	down
pme1194	2'-Deoxycytidine	Nucleotides and derivatives	1.20796	2.32868	up
HJAP106	N6-(4-hydroxybenzyl)adnine riboside	Nucleotides and derivatives	1.24096	9.86863	up
pme3732	Cytidine	Nucleotides and derivatives	1.17772	1.17158	up
pme3961	2'-Deoxyadenosine	Nucleotides and derivatives	1.13435	2.35093	up
pme1119	Inosine	Nucleotides and derivatives	1.08044	1.0046	up
mws0668	Xanthosine	Nucleotides and derivatives	1.24084	1.93209	up
Lmqp000329	5-Aminoimidazole ribonucleotide	Nucleotides and derivatives	1.24112	3.53305	up
pmb0197	N7-Methylguanosine	Nucleotides and derivatives	1.21717	-2.45768	down
pme1373	2'-Deoxycytidine-5'-monophosphate	Nucleotides and derivatives	1.11746	1.23242	up
pme3188	Uridine 5'-monophosphate	Nucleotides and derivatives	1.24143	-3.0023	down
pme3184	2'-Deoxyadenosine-5'-monophosphate	Nucleotides and derivatives	1.22371	-1.70681	down
mws0675	β-Nicotinamide mononucleotide	Nucleotides and derivatives	1.2332	-3.56215	down
mws0609	Guanosine 3',5'-cyclic monophosphate	Nucleotides and derivatives	1.17014	-1.84256	down
pmb0981	Adenosine 5'-monophosphate	Nucleotides and derivatives	1.23218	-3.42455	down
pmb0532	Inosine 5'-monophosphate	Nucleotides and derivatives	1.2334	-3.26996	down
pmb0998	Guanosine 5'-monophosphate	Nucleotides and derivatives	1.21556	-2.54256	down
pmb0964	Isopentenyladenine-7-N-glucoside	Nucleotides and derivatives	1.24196	13.6029	up
pme3337	Succinyladenosine	Nucleotides and derivatives	1.23589	-3.55221	down
pme3007	Uridine 5'-diphosphate	Nucleotides and derivatives	1.24285	14.0755	up
mws4052	1-Aminocyclopropane-1-carboxylic acid	Organic acids	1.18429	2.17036	up
pme3011	γ-Aminobutyric acid	Organic acids	1.23654	-2.71388	down
mws0206	2-Hydroxybutyric Acid	Organic acids	1.2243	-1.34582	down
mws0376	Fumaric acid	Organic acids	1.2428	-15.1081	down
pme2935	2-Oxovaleric acid	Organic acids	1.21719	7.63496	up
mws0147	β-Hydroxyisovaleric acid	Organic acids	1.22642	-2.27296	down
Lmbp000668	Isonicotinic acid*	Organic acids	1.20702	-2.65173	down
pme0274	6-Aminocaproic acid	Organic acids	1.23958	-2.49153	down
pme0243	Glutaric acid	Organic acids	1.24183	1.65054	up
pme3034	Ethylmalonic acid	Organic acids	1.24152	1.74248	up
mws0275	L-Malic acid	Organic acids	1.21377	1.15385	up
Lmbn000198	3-Dehydro-L-Threonic Acid	Organic acids	1.19581	1.15094	up
Lmbn002862	3-Hydroxybenzoic Acid	Organic acids	1.10194	-1.07662	down
mws0336	Urocanic acid	Organic acids	1.24077	11.9465	up
pme3207	Muconic acid	Organic acids	1.15759	-1.12859	down
pme2380	α-Ketoglutaric acid	Organic acids	1.21538	3.66213	up
mws0208	Adipic Acid	Organic acids	1.22308	1.30519	up
Lmbn001609	2-Acetyl-2-Hydroxybutanoic Acid	Organic acids	1.18332	1.07222	up
mws0924	2-Methylglutaric acid	Organic acids	1.22782	1.35109	up
Lmbn001676	3-Hydroxy-3-Methyl-2-Oxopentanoic Acid	Organic acids	1.10807	1.23591	up
pme3154	Mevalonic acid	Organic acids	1.23572	3.63955	up
mws0262	L-Tartaric acid	Organic acids	1.2427	13.8036	up
mws0639	2,3-Dihydroxybenzoic Acid	Organic acids	1.21118	2.46429	up
Lmbn001467	5-Acetamidopentanoic Acid	Organic acids	1.22566	-1.63701	down
mws0344	D-Xylonic acid	Organic acids	1.22631	-2.01664	down
mws2125	Phosphoenolpyruvate	Organic acids	1.23203	3.28468	up
Xmbp001692	2,4,6-Trihydroxybenzoic acid	Organic acids	1.24232	10.9077	up
mws0154	Shikimic acid	Organic acids	1.15368	1.52294	up
Zmgn001448	2-Propylmalic Acid*	Organic acids	1.24261	11.0805	up
pmb3101	2-Isopropylmalic Acid*	Organic acids	1.14096	1.56299	up
Zmyn000453	Isocitric Acid*	Organic acids	1.24186	2.79228	up
mws0281	Citric Acid*	Organic acids	1.24287	1.12777	up
mws0277	Quinic Acid	Organic acids	1.24208	2.73988	up
Lmtn004049	Abscisic acid	Organic acids	1.24024	2.55556	up
pma0134	D-(-)-Threose	Saccharides and Alcohols	1.06068	-1.33295	down
ML10171848	D-Arabinono-1,4-lactone	Saccharides and Alcohols	1.24039	3.93982	up
Zmzn000078	Dihydroxyacetone phosphate	Saccharides and Alcohols	1.21836	1.44523	up
mws4175	D-Glucurono-6,3-lactone	Saccharides and Alcohols	1.22875	-2.3745	down
pme2237	Dulcitol*	Saccharides and Alcohols	1.21105	-2.5524	down
Zmgn000447	3-Phospho-D-glyceric acid	Saccharides and Alcohols	1.23665	1.15688	up
pme0534	Gluconic acid	Saccharides and Alcohols	1.23229	-1.12768	down
Zmpn000199	D-Galactaric acid*	Saccharides and Alcohols	1.20817	-1.60065	down
Zmjn000425	D-Lactulose*	Saccharides and Alcohols	1.24247	15.5933	up
pme0490	Nicotinic acid (Vitamin B3)*	Vitamin	1.23083	-2.32842	down
pme2596	4-Pyridoxic acid	Vitamin	1.19543	1.00543	up
mws1337	D-Pantothenic Acid	Vitamin	1.22869	4.27256	up
pme2266	Biotin	Vitamin	1.09861	1.77052	up
pma1751	N-(beta-D-Glucosyl)nicotinate	Vitamin	1.23715	-1.96921	down
pme2289	Retinol (Vitamin A1)	Vitamin	1.2425	9.20863	up
pmb0789	Pyridoxine-5'-O-glucoside	Vitamin	1.20396	-1.9957	down
mws0232	Riboflavin (Vitamin B2)	Vitamin	1.23089	1.54246	up

## Sheet: Table S6
Table S6. Summary of throughput and quality Illumina-based transcriptome sequencing HZ and B8 pulps at different fruit development stages.
Sample	Raw Reads (Mb)	Clean Reads (Mb)	Clean Base (G)	Q20(%)	Q30(%)	Clean reads (%)	Total mapping genome (%)	Uniquely mapping genome (%)
B8S1_1	43.82	43.19	6.48	95.86	90.33	98.56	78.6	35.77
B8S1_2	45.57	43.45	6.52	96.41	91.42	95.35	80.04	38.71
B8S1_3	45.57	43.06	6.46	96.78	91.99	94.49	81.09	41.62
B8S2_1	43.82	43.13	6.47	95.78	90.16	98.43	77.91	35.17
B8S2_2	43.82	42.16	6.32	96.19	90.91	96.21	79.32	37.74
B8S2_3	45.57	43.25	6.49	96.88	92.2	94.91	80.66	42.08
B8S3_1	43.82	43.12	6.47	95.72	90.02	98.39	77.48	34.83
B8S3_2	43.82	42.06	6.31	96.14	90.81	95.99	78.5	37.02
B8S3_3	43.82	42.31	6.35	95.91	90.41	96.56	77.3	35.57
B8S4_1	43.82	43.18	6.48	95.81	90.22	98.54	77.16	34.99
B8S4_2	45.57	43.54	6.53	95.19	89.3	95.54	72.33	31.46
B8S4_3	43.82	42.21	6.33	96.1	90.86	96.32	77.23	36.07
B8S5_1	43.82	43.07	6.46	95.74	90.07	98.27	77.25	34.89
B8S5_2	43.82	42.2	6.33	95.64	90.15	96.3	74.56	34.04
B8S5_3	43.82	42.41	6.36	96	90.58	96.79	77.63	36.15
HZS1_1	43.82	42.99	6.45	95.83	90.28	98.1	78.34	35.83
HZS1_2	43.82	42.79	6.42	95.92	90.48	97.64	78.48	36.11
HZS1_3	43.82	41.96	6.29	95.41	89.67	95.74	74.69	33.43
HZS2_1	43.82	42.83	6.42	95.91	90.45	97.74	77.72	35.38
HZS2_2	43.82	43.14	6.47	95.92	90.47	98.45	77.78	35.42
HZS2_3	45.57	43.43	6.52	95.47	89.81	95.31	74.1	33.04
HZS3_1	43.82	43.07	6.46	95.78	90.18	98.28	77.1	34.51
HZS3_2	45.57	43.58	6.54	96.25	91.28	95.62	77.33	36.69
HZS3_3	43.82	42.03	6.3	96.85	92.15	95.9	80.34	41.28
HZS4_1	43.82	42.94	6.44	95.75	90.07	98	75.18	33.61
HZS4_2	45.57	43.58	6.54	96.28	91.12	95.63	76.56	36.32
HZS4_3	45.57	43.55	6.53	96.76	91.9	95.55	78.15	39.78
HZS5_1	43.82	43.05	6.46	95.84	90.3	98.23	76.21	34.59
HZS5_2	43.3	41.82	6.27	96.19	90.92	96.56	77.52	36.67
HZS5_3	45.57	43.61	6.54	96.9	92.22	95.69	79.32	41.1

## Sheet: Table S7
Table S7. KEGG enrichment analysis results of DEGs between B8S1 and B8S3.
KEGG_map	Description	DiffRatio_meta	BgRatio_meta	P-value_meta	Adjusted P-value_meta	Index_meta	CID_meta	Count_meta	DiffRatio_gene	BgRatio_gene	P-value_gene	Adjusted P-value_gene	Index_gene	KO_gene	Count_gene
ko00360	Phenylalanine metabolism	1/38	7/219	0.741951	1	pme2743	C05598	1	52/3751	178/21523	6.91746e-05	0.00940774	LITCHI013085.m1;LITCHI002183.m1;LITCHI004876.m1;LITCHI006469.m1;LITCHI022471.m2;LITCHI022850.m1;BGI_novel_G000629;BGI_novel_G001179;LITCHI020157.m1;LITCHI020157.m2;LITCHI016926.m1;LITCHI013063.m1;LITCHI021006.m1;LITCHI021008.m1;LITCHI011626.m3;LITCHI001978.m1;LITCHI001979.m1;LITCHI001983.m1;LITCHI001986.m1;LITCHI001989.m1;LITCHI003947.m1;LITCHI003948.m1;LITCHI003950.m1;LITCHI003952.m1;LITCHI02307…	K00074+K03028+K00276+K04733+K00276+K00276+K00457+K00457+K00457+K00457+K00811+K00815+K00815+K00815+K00817+K01426+K01426+K01426+K01426+K01426+K01426+K01426+K01426+K01426+K01426+K03006+K01593+K01593+K01593+K01593+K01593+K01593+K01593+K01593+K01593+K01593+K01593+K01593+K01593+K01593+K01593+K07253+K07253+K10775+K10775+K14454+K14454+K14455+K14455+K15849+K00816+K00816	52
ko00620	Pyruvate metabolism	3/38	6/219	0.0664031	1	Lmgn000188;Zmgn001448;pmb3101	C00256+C05994+C02504	3	98/3751	396/21523	0.00013094	0.0178078	LITCHI007374.m1;LITCHI018341.m1;LITCHI018342.m1;LITCHI022806.m1;LITCHI022806.m3;LITCHI022806.m5;LITCHI022806.m6;LITCHI022806.m7;LITCHI022806.m8;BGI_novel_G000113;BGI_novel_G000562;LITCHI029791.m1;LITCHI029791.m2;LITCHI007138.m1;LITCHI012990.m1;LITCHI029073.m1;LITCHI025661.m1;LITCHI017210.m2;LITCHI017745.m1;LITCHI017745.m5;LITCHI030478.m1;LITCHI030478.m5;LITCHI019030.m1;LITCHI003007.m2;LITCHI00300…	K00121+K00002+K00002+K00016+K00016+K00016+K00016+K00016+K00016+K00025+K00025+K04773+K04773+K00026+K00026+K00026+K00028+K00029+K00029+K00029+K00029+K00029+K00102+K00121+K00121+K00121+K00121+K00121+K00121+K00128+K00128+K00128+K00128+K00128+K17345+K00128+K00128+K00128+K00161+K00162+K00162+K00626+K00627+K00627+K00627+K00873+K00873+K00873+K00873+K00873+K00873+K00873+K00873+K01069+K01595+K01595+K01595+…	98
ko00350	Tyrosine metabolism	1/38	4/219	0.536115	1	pme1002	C00483	1	54/3751	200/21523	0.000461579	0.0627747	LITCHI007374.m1;LITCHI003007.m2;LITCHI003009.m1;LITCHI003010.m1;LITCHI003011.m1;LITCHI010022.m1;LITCHI025927.m1;LITCHI002183.m1;LITCHI004876.m1;LITCHI006469.m1;LITCHI022471.m2;LITCHI022850.m1;LITCHI013042.m2;BGI_novel_G000629;BGI_novel_G001179;LITCHI020157.m1;LITCHI020157.m2;LITCHI016926.m1;LITCHI013063.m1;LITCHI021006.m1;LITCHI021008.m1;LITCHI011626.m3;LITCHI029709.m1;LITCHI003455.m1;LITCHI02490…	K00121+K00121+K00121+K00121+K00121+K00121+K00121+K03028+K00276+K04733+K00276+K00276+K00451+K00457+K00457+K00457+K00457+K00811+K00815+K00815+K00815+K00817+K01555+K01593+K01593+K01593+K01593+K01593+K01593+K01593+K01593+K01593+K01593+K01593+K01593+K01593+K01593+K01593+K07253+K07253+K14454+K14454+K14455+K14455+K15849+K00816+K00816+K18857+K18857+K18857+K18857+K18857+K18857+K18857	54
ko00330	Arginine and proline metabolism	3/38	11/219	0.293215	1	pme3011;pme0120;mws0216	C00334+C00431+C01157	3	63/3751	246/21523	0.000761605	0.103578	LITCHI004975.m4;LITCHI006531.m1;LITCHI006531.m6;LITCHI011264.m1;LITCHI014486.m1;LITCHI020434.m1;LITCHI020508.m1;LITCHI020508.m2;LITCHI022360.m1;LITCHI022186.m1;LITCHI019295.m1;LITCHI001478.m1;LITCHI006395.m6;LITCHI006896.m1;LITCHI010060.m1;LITCHI010963.m2;LITCHI014620.m1;LITCHI017938.m1;LITCHI009625.m5;LITCHI016926.m1;LITCHI028765.m1;LITCHI028765.m2;LITCHI028765.m3;LITCHI028765.m6;LITCHI001355.m1…	K00128+K00128+K00128+K00128+K00128+K17345+K00128+K00128+K00128+K00294+K00318+K00472+K00472+K19042+K00472+K19042+K00472+K00472+K00797+K00811+K00819+K00819+K00819+K00819+K01259+K01426+K01426+K01426+K01426+K01426+K01426+K01426+K01426+K01426+K01426+K03006+K01611+K01611+K01611+K10536+K10536+K10536+K12259+K12657+K12657+K12657+K13427+K13427+K14085+K14085+K14085+K14085+K14085+K13264+K13264+K13264+K13264+…	63
ko01100	Metabolic pathways	32/38	186/219	0.661979	1	Lmgn000188;pme3033;pme3011;pme0120;mws0572;mws0216;Lmgn000160;pme0033;pme1002;mws0336;pme2380;Zmzn000113;mws0854;ML10176345;MA10039492;mws0154;Zmyn000155;pme0008;mws4175;pmb3101;pme0278;Zmzn000079;pme1654;mws4174;pma6455;pme0264;mws0976;pme2266;pme2563;pme3961;mws0367;pme2125	C00256+C01026+C00334+C00431+C02376+C01157+C02642+C00262+C00483+C00785+C00026+C03618+C00507+C02637+C05422+C00493+C00437+C00327+C02670+C02504+C00666+C00279+C08491+C00645+C00117+C00214+C02067+C00120+C00669+C00559+C06427+C00492	32	1685/3751	9174/21523	0.00094162	0.12806	LITCHI007374.m1;LITCHI018341.m1;LITCHI018342.m1;LITCHI009264.m1;LITCHI009266.m1;LITCHI001937.m1;LITCHI028657.m1;LITCHI028657.m3;LITCHI022806.m1;LITCHI022806.m3;LITCHI022806.m5;LITCHI022806.m6;LITCHI022806.m7;LITCHI022806.m8;LITCHI000273.m1;LITCHI000274.m1;LITCHI023057.m1;LITCHI002211.m1;LITCHI002211.m2;LITCHI006290.m1;LITCHI009869.m1;BGI_novel_G000113;BGI_novel_G000562;LITCHI029791.m1;LITCHI02979…	K00121+K00002+K00002+K00008+K00008+K00011+K00013+K00013+K00016+K00016+K00016+K00016+K00016+K00016+K00020+K00020+K00020+K00021+K00021+K00021+K00021+K00025+K00025+K04773+K04773+K00026+K00026+K00026+K00028+K00029+K00029+K00029+K00029+K00029+K00030+K00031+K00031+K00031+K00033+K00033+K00033+K00036+K00036+K00052+K00052+K00052+K00053+K00058+K00058+K00059+K00059+K00059+K08081+K00059+K00059+K00074+K00079+…	1685
ko01200	Carbon metabolism	4/38	20/219	0.469903	1	pme2380;Zmzn000113;Zmzn000079;pma6455	C00026+C03618+C00279+C00117	4	225/3751	1075/21523	0.00133799	0.181967	BGI_novel_G000113;BGI_novel_G000562;LITCHI029791.m1;LITCHI029791.m2;LITCHI007138.m1;LITCHI012990.m1;LITCHI029073.m1;LITCHI025661.m1;LITCHI017210.m2;LITCHI017745.m1;LITCHI017745.m5;LITCHI030478.m1;LITCHI030478.m5;LITCHI002158.m1;LITCHI008074.m4;LITCHI018183.m1;LITCHI020560.m2;LITCHI005406.m1;LITCHI019308.m1;LITCHI019309.m1;LITCHI004617.m1;LITCHI020680.m3;LITCHI001542.m1;LITCHI031625.m1;LITCHI01308…	K00025+K00025+K04773+K04773+K00026+K00026+K00026+K00028+K00029+K00029+K00029+K00029+K00029+K00030+K00031+K00031+K00031+K00033+K00033+K00033+K00036+K00036+K00058+K00058+K00074+K00121+K00121+K00121+K00121+K00121+K00121+K00131+K00134+K00134+K00134+K00140+K00161+K00162+K00162+K00164+K00164+K00164+K00232+K00232+K00232+K00232+K00234+K00261+K00281+K00297+K00600+K00600+K00600+K00600+K00600+K00600+K17732+…	225
ko00950	Isoquinoline alkaloid biosynthesis	1/38	2/219	0.317582	1	pme1002	C00483	1	31/3751	105/21523	0.00154491	0.210108	LITCHI002183.m1;LITCHI004876.m1;LITCHI006469.m1;LITCHI022471.m2;LITCHI022850.m1;LITCHI016926.m1;LITCHI013063.m1;LITCHI021006.m1;LITCHI021008.m1;LITCHI003455.m1;LITCHI024903.m1;LITCHI025006.m1;LITCHI025021.m1;LITCHI025021.m2;LITCHI025028.m1;LITCHI025034.m1;LITCHI025036.m1;LITCHI025037.m1;LITCHI025038.m1;LITCHI025039.m1;LITCHI025040.m1;LITCHI025040.m2;LITCHI025940.m1;LITCHI027794.m1;LITCHI016773.m1…	K03028+K00276+K04733+K00276+K00276+K00811+K00815+K00815+K00815+K01593+K01593+K01593+K01593+K01593+K01593+K01593+K01593+K01593+K01593+K01593+K01593+K01593+K01593+K01593+K14454+K14454+K14455+K14455+K15849+K00816+K00816	31
ko00592	alpha-Linolenic acid metabolism	2/38	7/219	0.349717	1	pme1654;mws0367	C08491+C06427	2	41/3751	151/21523	0.00186127	0.253133	LITCHI006953.m1;LITCHI007148.m1;LITCHI026964.m1;LITCHI007964.m1;LITCHI018187.m1;LITCHI018190.m1;LITCHI022760.m1;LITCHI002462.m1;LITCHI004723.m1;LITCHI004723.m2;LITCHI004723.m6;LITCHI021614.m1;LITCHI024086.m1;LITCHI024087.m1;LITCHI024088.m1;LITCHI024090.m1;LITCHI011707.m1;LITCHI011712.m1;LITCHI011713.m1;LITCHI017545.m2;LITCHI015113.m1;LITCHI006433.m1;LITCHI006590.m1;LITCHI004724.m1;LITCHI004724.m2…	K00224+K00224+K00224+K00232+K00232+K00232+K00232+K00454+K00454+K00454+K00454+K00454+K00454+K00454+K00454+K00454+K05894+K05894+K05894+K05894+K07513+K08241+K21483+K10526+K10526+K10526+K10526+K10526+K10526+K10527+K10528+K16818+K16818+K00145+K18857+K18857+K18857+K18857+K18857+K18857+K18857	41
ko00710	Carbon fixation in photosynthetic organisms	2/38	9/219	0.48306	1	Zmzn000079;pma6455	C00279+C00117	2	58/3751	231/21523	0.00196983	0.267897	BGI_novel_G000113;BGI_novel_G000562;LITCHI029791.m1;LITCHI029791.m2;LITCHI007138.m1;LITCHI012990.m1;LITCHI029073.m1;LITCHI025661.m1;LITCHI017210.m2;LITCHI017745.m1;LITCHI017745.m5;LITCHI030478.m1;LITCHI030478.m5;LITCHI004745.m1;LITCHI009737.m1;LITCHI022581.m1;LITCHI009142.m1;LITCHI025527.m1;LITCHI025527.m2;LITCHI025527.m3;LITCHI029890.m1;LITCHI019783.m1;LITCHI009678.m1;LITCHI009727.m1;LITCHI00545…	K00025+K00025+K04773+K04773+K00026+K00026+K00026+K00028+K00029+K00029+K00029+K00029+K00029+K00134+K00134+K00134+K00615+K00615+K00615+K00615+K00814+K00855+K00927+K00927+K01595+K01595+K01595+K01595+K01595+K01595+K01595+K01595+K01595+K01595+K01595+K01595+K01602+K01610+K01623+K01623+K01623+K01803+K01803+K01807+K15363+K15363+K15363+K03841+K03841+K03841+K03841+K05298+K05298+K05298+K14454+K14454+K14455+…	58
ko01110	Biosynthesis of secondary metabolites	14/38	84/219	0.650263	1	pme1002;pme2380;Lmbn001676;mws0639;ML10176345;mws0154;Zmyn000155;pme0008;pmb3101;pme0278;Zmzn000079;pme1654;pma6455;mws0367	C00483+C00026+C14463+C00196+C02637+C00493+C00437+C00327+C02504+C00666+C00279+C08491+C00117+C06427	14	957/3751	5103/21523	0.00239404	0.32559	LITCHI007374.m1;LITCHI018341.m1;LITCHI018342.m1;LITCHI004455.m1;LITCHI008746.m1;LITCHI008746.m2;LITCHI008746.m4;LITCHI008746.m7;LITCHI028657.m1;LITCHI028657.m3;LITCHI022806.m1;LITCHI022806.m3;LITCHI022806.m5;LITCHI022806.m6;LITCHI022806.m7;LITCHI022806.m8;LITCHI002211.m1;LITCHI002211.m2;LITCHI006290.m1;LITCHI009869.m1;BGI_novel_G000113;BGI_novel_G000562;LITCHI029791.m1;LITCHI029791.m2;LITCHI00713…	K00121+K00002+K00002+K00006+K00006+K00006+K00006+K00006+K00013+K00013+K00016+K00016+K00016+K00016+K00016+K00016+K00021+K00021+K00021+K00021+K00025+K00025+K04773+K04773+K00026+K00026+K00026+K00030+K00031+K00031+K00031+K00033+K00033+K00033+K00036+K00036+K00052+K00052+K00052+K00053+K00058+K00058+K00059+K00059+K00059+K08081+K00059+K00059+K00083+K00083+K00083+K00083+K00083+K00083+K00083+K00083+K00083+…	957
ko00340	Histidine metabolism	2/38	7/219	0.349717	1	mws0336;pme2380	C00785+C00026	2	22/3751	70/21523	0.00302727	0.411709	LITCHI028657.m1;LITCHI028657.m3;LITCHI004975.m4;LITCHI006531.m1;LITCHI006531.m6;LITCHI011264.m1;LITCHI014486.m1;LITCHI020434.m1;LITCHI020508.m1;LITCHI020508.m2;LITCHI022360.m1;LITCHI000122.m1;LITCHI011626.m3;LITCHI011436.m1;LITCHI011436.m2;LITCHI030211.m1;LITCHI030211.m2;LITCHI030211.m3;LITCHI030211.m4;LITCHI030211.m9;LITCHI001872.m1;LITCHI019216.m1	K00013+K00013+K00128+K00128+K00128+K00128+K00128+K17345+K00128+K00128+K00128+K00765+K00817+K01590+K01590+K14085+K14085+K14085+K14085+K14085+K18649+K19787	22
ko00052	Galactose metabolism	1/38	16/219	0.958022	1	pme2125	C00492	1	80/3751	348/21523	0.00459523	0.624951	LITCHI001937.m1;LITCHI010132.m1;LITCHI010132.m5;LITCHI017728.m1;LITCHI017728.m2;LITCHI017728.m3;LITCHI017728.m4;LITCHI017728.m5;LITCHI017728.m6;LITCHI023638.m8;LITCHI023638.m9;LITCHI030461.m1;LITCHI030461.m2;LITCHI010554.m1;LITCHI016150.m1;LITCHI017233.m10;LITCHI017233.m2;LITCHI017233.m3;LITCHI017233.m4;LITCHI025298.m1;LITCHI028866.m1;LITCHI029849.m1;LITCHI030438.m1;LITCHI030439.m1;LITCHI030440.m…	K00011+K00844+K00844+K00844+K00844+K00844+K00844+K00844+K00844+K00844+K00844+K00844+K00844+K07893+K07893+K00850+K00850+K00850+K00850+K07893+K07893+K00850+K00850+K00850+K00850+K00963+K10268+K00965+K01187+K01187+K01187+K01190+K01190+K07393+K01193+K01193+K01193+K01193+K01193+K01193+K01229+K01784+K01785+K01835+K01835+K06617+K06617+K06617+K06617+K06617+K06617+K06617+K07407+K07407+K07407+K07407+K07407+…	80
ko00520	Amino sugar and nucleotide sugar metabolism	1/38	12/219	0.904891	1	mws4174	C00645	1	106/3751	491/21523	0.00950544	1	LITCHI003296.m1;LITCHI016638.m1;LITCHI016638.m2;LITCHI026513.m1;LITCHI002454.m1;LITCHI010132.m1;LITCHI010132.m5;LITCHI017728.m1;LITCHI017728.m2;LITCHI017728.m3;LITCHI017728.m4;LITCHI017728.m5;LITCHI017728.m6;LITCHI023638.m8;LITCHI023638.m9;LITCHI030461.m1;LITCHI030461.m2;LITCHI005338.m2;LITCHI014376.m1;LITCHI015916.m1;LITCHI008052.m1;LITCHI009060.m1;LITCHI003340.m1;LITCHI018344.m1;LITCHI027645.m2…	K00326+K00326+K00326+K00770+K00820+K00844+K00844+K00844+K00844+K00844+K00844+K00844+K00844+K00844+K00844+K00844+K00844+K00847+K00847+K00847+K00963+K10268+K00965+K00966+K00966+K00972+K00975+K01082+K01183+K14638+K01183+K01183+K01183+K01183+K01183+K04733+K01183+K20131+K01209+K01784+K01809+K01809+K01809+K01810+K01810+K01835+K01835+K01836+K02377+K05305+K06118+K08678+K08678+K08678+K08678+K08678+K08678+…	106
ko00051	Fructose and mannose metabolism	1/38	6/219	0.685918	1	mws0854	C00507	1	57/3751	244/21523	0.0107103	1	LITCHI009264.m1;LITCHI009266.m1;LITCHI001937.m1;LITCHI010132.m1;LITCHI010132.m5;LITCHI017728.m1;LITCHI017728.m2;LITCHI017728.m3;LITCHI017728.m4;LITCHI017728.m5;LITCHI017728.m6;LITCHI023638.m8;LITCHI023638.m9;LITCHI030461.m1;LITCHI030461.m2;LITCHI005338.m2;LITCHI014376.m1;LITCHI015916.m1;LITCHI010554.m1;LITCHI016150.m1;LITCHI017233.m10;LITCHI017233.m2;LITCHI017233.m3;LITCHI017233.m4;LITCHI025298.m…	K00008+K00008+K00011+K00844+K00844+K00844+K00844+K00844+K00844+K00844+K00844+K00844+K00844+K00844+K00844+K00847+K00847+K00847+K07893+K07893+K00850+K00850+K00850+K00850+K07893+K07893+K00850+K00850+K00850+K00850+K00895+K00895+K00895+K00895+K00966+K00966+K01103+K01623+K01623+K01623+K01803+K01803+K01805+K01805+K01805+K01809+K01809+K01809+K02377+K03841+K03841+K03841+K03841+K05305+K19355+K19355+K19355	57
ko00480	Glutathione metabolism	2/38	10/219	0.543544	1	MA10039492;pme2563	C05422+C00669	2	62/3751	279/21523	0.022835	1	LITCHI008074.m4;LITCHI018183.m1;LITCHI020560.m2;LITCHI005406.m1;LITCHI019308.m1;LITCHI019309.m1;LITCHI004617.m1;LITCHI020680.m3;LITCHI024354.m2;LITCHI026121.m1;LITCHI026121.m8;LITCHI015841.m1;LITCHI015841.m2;LITCHI015841.m5;LITCHI016878.m1;LITCHI022143.m1;LITCHI022145.m1;LITCHI026281.m1;LITCHI006043.m1;LITCHI010566.m1;LITCHI018535.m1;LITCHI009625.m5;BGI_novel_G000610;LITCHI003163.m1;LITCHI008128.…	K00031+K00031+K00031+K00033+K00033+K00033+K00036+K00036+K08867+K00383+K00383+K00432+K00432+K00432+K00432+K00432+K00432+K00432+K00434+K00434+K00434+K00797+K00799+K00799+K00799+K00799+K00799+K00799+K00799+K00799+K00799+K00799+K00799+K00799+K00799+K00799+K00799+K00799+K00799+K00799+K01255+K01255+K01255+K01255+K01255+K01255+K01256+K01469+K01469+K01469+K10807+K10808+K05387+K18592+K18592+K21456+K21456+…	62
ko02010	ABC transporters	4/38	41/219	0.95813	1	mws0216;pme2266;pme3961;pme2125	C01157+C00120+C00559+C00492	4	57/3751	255/21523	0.0252204	1	LITCHI022179.m1;LITCHI022180.m1;LITCHI008826.m1;LITCHI023337.m1;LITCHI004862.m1;LITCHI010096.m1;LITCHI015288.m2;LITCHI016504.m1;LITCHI016504.m2;LITCHI017962.m1;LITCHI018643.m1;LITCHI018643.m2;LITCHI018643.m3;LITCHI018643.m4;LITCHI019561.m2;LITCHI020454.m1;LITCHI020470.m1;LITCHI026684.m1;LITCHI027540.m2;LITCHI027791.m2;LITCHI027992.m2;LITCHI027992.m4;LITCHI029248.m1;LITCHI029919.m1;LITCHI029921.m1…	K05643+K05643+K05643+K05657+K05278+K05658+K03243+K05658+K05658+K05658+K05658+K05658+K05658+K05658+K05658+K05658+K05658+K05658+K05658+K05658+K12448+K12448+K05658+K05658+K05658+K00924+K05665+K05665+K05666+K05666+K05665+K05666+K05665+K05666+K05666+K05666+K05666+K05666+K05666+K05666+K05665+K05665+K05677+K05681+K21396+K05681+K05681+K05681+K05681+K05681+K05681+K05681+K05681+K05681+K05681+K05681+K05681	57
ko00750	Vitamin B6 metabolism	2/38	7/219	0.349717	1	Zmzn000079;pma6455	C00279+C00117	2	12/3751	39/21523	0.029485	1	LITCHI030181.m1;LITCHI002939.m1;LITCHI002960.m1;LITCHI003652.m1;LITCHI012377.m1;LITCHI018216.m1;LITCHI030630.m1;LITCHI024720.m1;LITCHI017652.m1;LITCHI017655.m1;LITCHI030035.m1;LITCHI030036.m1	K01733+K05275+K05275+K17744+K05275+K06215+K06215+K08681+K15084+K13248+K13248+K13248	12
ko04075	Plant hormone signal transduction	2/38	4/219	0.139989	1	pme1654;pme2074	C08491+C18699	2	246/3751	1270/21523	0.0339052	1	LITCHI003632.m1;LITCHI005070.m1;LITCHI010783.m1;LITCHI010968.m1;LITCHI015696.m1;LITCHI016791.m1;LITCHI020266.m1;LITCHI026700.m1;LITCHI026971.m2;LITCHI012882.m1;LITCHI020925.m1;LITCHI025182.m1;LITCHI026022.m1;LITCHI028586.m1;LITCHI029036.m1;LITCHI029036.m2;LITCHI005968.m1;LITCHI007693.m1;LITCHI013084.m1;LITCHI013084.m2;LITCHI013084.m3;LITCHI013084.m4;LITCHI013084.m5;LITCHI013492.m1;LITCHI013492.m2…	K16189+K04733+K11253+K10863+K11253+K14638+K04733+K12126+K11253+K13413+K13413+K13413+K13413+K13413+K13413+K13413+K13415+K13415+K13415+K13415+K13415+K13415+K13415+K13415+K13415+K13415+K13420+K13415+K13418+K13418+K13422+K13422+K07560+K18486+K08867+K08867+K13422+K13422+K13422+K16189+K13422+K22484+K22484+K13422+K13422+K22484+K13449+K13463+K13464+K13464+K13464+K13464+K13464+K13464+K13464+K13464+K13946+…	246
ko01040	Biosynthesis of unsaturated fatty acids	1/38	5/219	0.618104	1	mws0367	C06427	1	18/3751	67/21523	0.0352183	1	LITCHI007964.m1;LITCHI018187.m1;LITCHI018190.m1;LITCHI022760.m1;LITCHI025678.m2;LITCHI004162.m1;LITCHI004163.m1;LITCHI011384.m1;LITCHI015460.m1;LITCHI015113.m1;LITCHI004778.m1;LITCHI004781.m1;LITCHI019131.m2;LITCHI024146.m1;LITCHI018423.m1;LITCHI018423.m2;LITCHI027737.m1;LITCHI007229.m1	K00232+K00232+K00232+K00232+K01068+K03921+K03921+K03921+K03921+K07513+K16449+K10251+K10256+K10256+K10258+K10258+K10355+K10703	18
ko00630	Glyoxylate and dicarboxylate metabolism	2/38	11/219	0.599173	1	pme2380;Zmzn000113	C00026+C03618	2	64/3751	297/21523	0.0379186	1	BGI_novel_G000113;BGI_novel_G000562;LITCHI029791.m1;LITCHI029791.m2;LITCHI007138.m1;LITCHI012990.m1;LITCHI029073.m1;LITCHI016562.m1;LITCHI008659.m1;LITCHI000391.m1;LITCHI003655.m1;LITCHI010378.m1;LITCHI014986.m1;LITCHI014991.m1;LITCHI017258.m1;LITCHI017682.m1;LITCHI000289.m1;LITCHI029609.m2;LITCHI029812.m1;LITCHI007030.m1;LITCHI007032.m1;LITCHI000280.m1;LITCHI024826.m1;LITCHI008481.m1;LITCHI01579…	K00025+K00025+K04773+K04773+K00026+K00026+K00026+K00281+K00284+K00600+K00600+K00600+K00600+K00600+K00600+K17732+K00605+K00605+K00626+K01455+K01455+K01569+K01569+K01602+K01637+K01637+K01637+K01647+K01681+K01681+K01681+K01681+K01681+K01681+K01681+K01681+K01681+K01681+K01895+K01895+K15164+K00666+K23108+K00700+K01913+K01913+K01915+K01915+K03781+K03781+K11517+K11517+K11517+K11517+K11517+K11517+K15893+…	64
ko01240	Biosynthesis of cofactors	8/38	48/219	0.63042	1	pme1002;pme2380;ML10176345;mws0154;Zmzn000079;pma6455;pme2266;pme2563	C00483+C00026+C02637+C00493+C00279+C00117+C00120+C00669	8	183/3751	937/21523	0.046914	1	LITCHI018341.m1;LITCHI018342.m1;LITCHI000864.m1;LITCHI003412.m1;LITCHI003412.m4;LITCHI003959.m1;LITCHI004740.m1;LITCHI008624.m1;LITCHI026799.m1;LITCHI004975.m4;LITCHI006531.m1;LITCHI006531.m6;LITCHI011264.m1;LITCHI014486.m1;LITCHI020434.m1;LITCHI020508.m1;LITCHI020508.m2;LITCHI022360.m1;LITCHI019135.m1;LITCHI024137.m1;LITCHI019173.m1;LITCHI019175.m1;BGI_novel_G000629;BGI_novel_G001179;LITCHI02015…	K00002+K00002+K00059+K00059+K00059+K08081+K00059+K00059+K00103+K00128+K00128+K00128+K00128+K00128+K17345+K00128+K00128+K00128+K00208+K00208+K00228+K00228+K00457+K00457+K00457+K00457+K00600+K00600+K00600+K00600+K00600+K00600+K17732+K00606+K00606+K00699+K00763+K00763+K00767+K19892+K00789+K00789+K00789+K00789+K00789+K00789+K00789+K00789+K00826+K00826+K00873+K00873+K00873+K00873+K00873+K00873+K00873+…	183
ko00430	Taurine and hypotaurine metabolism	1/38	3/219	0.437084	1	pme2380	C00026	1	12/3751	42/21523	0.0505763	1	LITCHI008117.m1;LITCHI020148.m2;LITCHI003402.m1;LITCHI010557.m1;LITCHI017884.m2;LITCHI020913.m1;LITCHI020913.m2;LITCHI023265.m1;LITCHI029026.m1;LITCHI003077.m1;LITCHI017700.m2;LITCHI030923.m1	K01580+K01580+K10712+K10712+K10712+K10712+K10712+K10712+K10712+K05387+K18592+K18592	12
ko01230	Biosynthesis of amino acids	9/38	43/219	0.312299	1	pme2380;ML10176345;mws0154;Zmyn000155;pme0008;pmb3101;pme0278;Zmzn000079;pma6455	C00026+C02637+C00493+C00437+C00327+C02504+C00666+C00279+C00117	9	186/3751	961/21523	0.0598774	1	LITCHI028657.m1;LITCHI028657.m3;LITCHI002158.m1;LITCHI008074.m4;LITCHI018183.m1;LITCHI020560.m2;LITCHI011549.m1;LITCHI018771.m1;LITCHI028378.m2;LITCHI020941.m1;LITCHI001542.m1;LITCHI031625.m1;LITCHI005872.m3;LITCHI004745.m1;LITCHI009737.m1;LITCHI022581.m1;LITCHI009631.m1;LITCHI003379.m1;LITCHI003380.m1;LITCHI003756.m1;LITCHI008692.m1;LITCHI008694.m1;LITCHI014589.m1;LITCHI014589.m2;LITCHI023867.m1…	K00013+K00013+K00030+K00031+K00031+K00031+K00052+K00052+K00052+K00053+K00058+K00058+K00133+K00134+K00134+K00134+K00264+K00549+K00549+K22733+K00549+K00549+K00549+K00549+K00549+K21343+K00549+K00600+K00600+K00600+K00600+K00600+K00600+K17732+K00615+K00615+K00615+K00615+K00616+K00616+K00640+K00640+K00640+K00640+K00765+K00766+K00766+K19892+K00789+K00789+K00789+K00789+K00789+K00789+K00789+K00789+K00800+…	186
ko00780	Biotin metabolism	1/38	2/219	0.317582	1	pme2266	C00120	1	15/3751	58/21523	0.06895	1	LITCHI000864.m1;LITCHI003412.m1;LITCHI003412.m4;LITCHI003959.m1;LITCHI004740.m1;LITCHI008624.m1;LITCHI019135.m1;LITCHI024137.m1;LITCHI015839.m2;LITCHI001178.m1;LITCHI017490.m1;LITCHI017490.m2;LITCHI021898.m1;LITCHI028839.m1;LITCHI028839.m2	K00059+K00059+K00059+K08081+K00059+K00059+K00208+K00208+K01012+K02372+K09458+K09458+K09458+K09458+K09458	15
ko00260	Glycine, serine and threonine metabolism	1/38	8/219	0.788205	1	pme3033	C01026	1	47/3751	221/21523	0.079847	1	LITCHI001542.m1;LITCHI031625.m1;LITCHI022943.m1;LITCHI022291.m1;LITCHI005872.m3;LITCHI002183.m1;LITCHI004876.m1;LITCHI006469.m1;LITCHI022471.m2;LITCHI022850.m1;LITCHI016562.m1;BGI_novel_G000088;LITCHI016448.m1;LITCHI000391.m1;LITCHI003655.m1;LITCHI010378.m1;LITCHI014986.m1;LITCHI014991.m1;LITCHI017258.m1;LITCHI017682.m1;LITCHI000289.m1;LITCHI029609.m2;LITCHI007835.m1;LITCHI020829.m1;LITCHI014460.…	K00058+K00058+K00108+K00130+K00133+K03028+K00276+K04733+K00276+K00276+K00281+K00306+K00499+K00600+K00600+K00600+K00600+K00600+K00600+K17732+K00605+K00605+K00827+K00928+K08726+K01079+K01079+K08726+K08726+K01620+K01620+K01620+K01620+K01696+K01733+K01754+K06001+K12235+K12524+K14085+K14085+K14085+K14085+K14085+K15633+K15893+K15919	47
ko00030	Pentose phosphate pathway	2/38	6/219	0.279038	1	Zmzn000079;pma6455	C00279+C00117	2	48/3751	228/21523	0.0887095	1	LITCHI005406.m1;LITCHI019308.m1;LITCHI019309.m1;LITCHI004617.m1;LITCHI020680.m3;LITCHI016135.m3;LITCHI009142.m1;LITCHI025527.m1;LITCHI025527.m2;LITCHI025527.m3;LITCHI021712.m1;LITCHI022825.m2;LITCHI010554.m1;LITCHI016150.m1;LITCHI017233.m10;LITCHI017233.m2;LITCHI017233.m3;LITCHI017233.m4;LITCHI025298.m1;LITCHI028866.m1;LITCHI029849.m1;LITCHI030438.m1;LITCHI030439.m1;LITCHI030440.m1;LITCHI002965.m…	K00033+K00033+K00033+K00036+K00036+K00131+K00615+K00615+K00615+K00615+K00616+K00616+K07893+K07893+K00850+K00850+K00850+K00850+K07893+K07893+K00850+K00850+K00850+K00850+K00851+K00852+K00895+K00895+K00895+K00895+K20308+K01057+K01057+K01623+K01623+K01623+K01807+K15363+K15363+K15363+K01810+K01810+K01835+K01835+K03841+K03841+K03841+K03841	48
ko00591	Linoleic acid metabolism	1/38	14/219	0.936674	1	Lmbn005923	C07289	1	16/3751	65/21523	0.0897766	1	LITCHI002462.m1;LITCHI004723.m1;LITCHI004723.m2;LITCHI004723.m6;LITCHI021614.m1;LITCHI024086.m1;LITCHI024087.m1;LITCHI024088.m1;LITCHI024090.m1;LITCHI029559.m1;LITCHI003969.m2;LITCHI003970.m1;LITCHI003970.m2;LITCHI004046.m1;LITCHI014768.m1;LITCHI014768.m3	K00454+K00454+K00454+K00454+K00454+K00454+K00454+K00454+K00454+K07409+K15718+K15718+K15718+K15718+K15718+K15718	16
ko00053	Ascorbate and aldarate metabolism	3/38	14/219	0.450769	1	pme2380;MA10039492;mws4175	C00026+C05422+C02670	3	47/3751	224/21523	0.095289	1	LITCHI018341.m1;LITCHI018342.m1;LITCHI026799.m1;LITCHI004975.m4;LITCHI006531.m1;LITCHI006531.m6;LITCHI011264.m1;LITCHI014486.m1;LITCHI020434.m1;LITCHI020508.m1;LITCHI020508.m2;LITCHI022360.m1;LITCHI006043.m1;LITCHI010566.m1;LITCHI018535.m1;LITCHI017698.m1;LITCHI009263.m1;LITCHI018810.m1;LITCHI022041.m1;LITCHI014994.m1;LITCHI025535.m1;LITCHI003640.m4;LITCHI014912.m1;LITCHI014912.m2;LITCHI014912.m3…	K00002+K00002+K00103+K00128+K00128+K00128+K00128+K00128+K17345+K00128+K00128+K00128+K00434+K00434+K00434+K00469+K00699+K08232+K08232+K08679+K04733+K10046+K10046+K10046+K10046+K10046+K10046+K10047+K01528+K12447+K14085+K14085+K14085+K14085+K14085+K14190+K14190+K14190+K13422+K16190+K17744+K05275+K14521+K18649+K21888+K21888+K21888	47
ko00250	Alanine, aspartate and glutamate metabolism	2/38	11/219	0.599173	1	pme3011;pme2380	C00334+C00026	2	33/3751	155/21523	0.123157	1	LITCHI020203.m1;LITCHI030012.m1;LITCHI009631.m1;LITCHI022186.m1;LITCHI001943.m1;LITCHI016926.m1;LITCHI029890.m1;LITCHI002454.m1;LITCHI007835.m1;LITCHI008117.m1;LITCHI020148.m2;LITCHI027512.m1;LITCHI008105.m1;LITCHI018686.m1;LITCHI008980.m1;LITCHI008980.m2;LITCHI008980.m3;LITCHI008980.m4;LITCHI022601.m1;LITCHI025248.m1;LITCHI013192.m1;LITCHI024751.m1;LITCHI007624.m3;LITCHI016661.m1;LITCHI010919.m1…	K00261+K00262+K00264+K00294+K00764+K00811+K00814+K00820+K00827+K01580+K01580+K01756+K01915+K01915+K01939+K01939+K01939+K01939+K01940+K14326+K13783+K01955+K01956+K01956+K13051+K13051+K13051+K13566+K14454+K14454+K14455+K14455+K17761	33
ko00410	beta-Alanine metabolism	2/38	7/219	0.349717	1	pme3011;Lmgn000160	C00334+C02642	2	40/3751	194/21523	0.140245	1	LITCHI004975.m4;LITCHI006531.m1;LITCHI006531.m6;LITCHI011264.m1;LITCHI014486.m1;LITCHI020434.m1;LITCHI020508.m1;LITCHI020508.m2;LITCHI022360.m1;LITCHI019858.m1;LITCHI007964.m1;LITCHI018187.m1;LITCHI018190.m1;LITCHI022760.m1;LITCHI002183.m1;LITCHI004876.m1;LITCHI006469.m1;LITCHI022471.m2;LITCHI022850.m1;LITCHI001268.m1;LITCHI023740.m1;LITCHI023740.m2;LITCHI008117.m1;LITCHI020148.m2;LITCHI025874.m1…	K00128+K00128+K00128+K00128+K00128+K17345+K00128+K00128+K00128+K00140+K00232+K00232+K00232+K00232+K03028+K00276+K04733+K00276+K00276+K01431+K01464+K01464+K01580+K01580+K01918+K05605+K05605+K05605+K05605+K05605+K05605+K12259+K14085+K14085+K14085+K14085+K14085+K02293+K17839+K00020	40
ko00650	Butanoate metabolism	2/38	6/219	0.279038	1	pme3011;pme2380	C00334+C00026	2	20/3751	94/21523	0.195386	1	LITCHI013085.m1;LITCHI019236.m1;LITCHI029812.m1;LITCHI008117.m1;LITCHI020148.m2;LITCHI023761.m1;LITCHI023761.m6;LITCHI030683.m2;LITCHI022941.m1;LITCHI004389.m1;LITCHI012599.m1;LITCHI025692.m1;LITCHI006359.m1;LITCHI009705.m1;LITCHI009975.m1;LITCHI012488.m1;LITCHI014398.m1;LITCHI009773.m1;LITCHI021544.m2;LITCHI021544.m3	K00074+K00109+K00626+K01580+K01580+K01640+K01640+K11292+K01641+K00549+K01652+K00549+K00666+K23108+K00700+K01913+K01913+K17761+K18121+K18121	20
ko00230	Purine metabolism	3/38	19/219	0.675987	1	pme0033;pma6455;pme3961	C00262+C00117+C00559	3	72/3751	394/21523	0.347605	1	LITCHI023965.m1;LITCHI027069.m4;LITCHI022884.m1;LITCHI010839.m10;LITCHI010839.m5;LITCHI011538.m1;LITCHI001943.m1;LITCHI002904.m1;LITCHI010267.m1;LITCHI018602.m1;LITCHI007063.m14;LITCHI007063.m19;LITCHI007063.m20;LITCHI007063.m3;LITCHI007063.m4;LITCHI001406.m1;LITCHI003418.m1;LITCHI009466.m1;LITCHI014910.m2;LITCHI018757.m1;LITCHI024313.m1;LITCHI024313.m2;LITCHI027188.m2;BGI_novel_G001060;LITCHI018…	K00106+K00365+K00602+K00759+K00759+K00760+K00764+K00847+K11883+K00856+K00860+K00860+K00860+K00860+K00860+K00873+K00873+K00873+K00873+K00873+K00873+K00873+K00873+K15542+K00939+K00939+K00939+K00940+K00940+K00940+K20308+K00951+K00951+K00951+K00951+K01081+K01427+K01466+K01488+K01490+K01490+K01510+K01510+K01510+K01510+K01513+K01519+K01756+K01835+K01835+K01939+K01939+K01939+K01939+K01945+K01952+K01952+…	72
ko00400	Phenylalanine, tyrosine and tryptophan biosynthesis	3/38	10/219	0.241123	1	ML10176345;mws0154;Zmzn000079	C02637+C00493+C00279	3	36/3751	199/21523	0.431262	1	LITCHI022417.m1;LITCHI022417.m6;LITCHI025528.m1;LITCHI016926.m1;LITCHI013063.m1;LITCHI021006.m1;LITCHI021008.m1;LITCHI011626.m3;LITCHI020481.m4;LITCHI007298.m1;LITCHI010548.m1;LITCHI025090.m1;LITCHI025094.m1;LITCHI005942.m1;LITCHI013419.m1;LITCHI006432.m1;LITCHI027861.m1;LITCHI016888.m1;LITCHI019462.m1;LITCHI021308.m1;LITCHI024511.m1;LITCHI024511.m2;LITCHI024758.m1;LITCHI029623.m2;LITCHI019253.m1…	K00766+K00766+K00800+K00811+K00815+K00815+K00815+K00817+K00891+K01626+K01626+K01657+K01657+K01658+K01696+K01735+K01736+K01850+K01850+K05359+K05359+K05359+K05359+K05359+K06001+K13832+K13832+K13832+K13832+K14454+K14454+K14455+K14455+K15849+K00816+K00816	36
ko00020	Citrate cycle (TCA cycle)	1/38	6/219	0.685918	1	pme2380	C00026	1	47/3751	279/21523	0.626373	1	BGI_novel_G000113;BGI_novel_G000562;LITCHI029791.m1;LITCHI029791.m2;LITCHI007138.m1;LITCHI012990.m1;LITCHI029073.m1;LITCHI002158.m1;LITCHI008074.m4;LITCHI018183.m1;LITCHI020560.m2;LITCHI021806.m1;LITCHI004594.m1;LITCHI020277.m2;LITCHI027777.m1;LITCHI027777.m4;LITCHI027777.m5;LITCHI006643.m2;LITCHI005512.m1;LITCHI027191.m3;LITCHI027194.m1;LITCHI021314.m1;LITCHI007159.m2;LITCHI004325.m2;LITCHI00231…	K00025+K00025+K04773+K04773+K00026+K00026+K00026+K00030+K00031+K00031+K00031+K00161+K00162+K00162+K00164+K00164+K00164+K00234+K00627+K00627+K00627+K00658+K01610+K01647+K01648+K01648+K01648+K01648+K01648+K01648+K01648+K01648+K01648+K01648+K01681+K01681+K01681+K01681+K01681+K01681+K01681+K01681+K01681+K01681+K01899+K01899+K01900	47
ko00440	Phosphonate and phosphinate metabolism	1/38	3/219	0.437084	1	pma6455	C00117	1	8/3751	50/21523	0.662481	1	LITCHI002895.m3;LITCHI019659.m1;LITCHI019194.m1;LITCHI028394.m1;LITCHI028394.m4;LITCHI001906.m1;LITCHI019293.m1;LITCHI030115.m1	K00967+K00967+K00968+K00968+K00968+K00993+K00993+K06167	8
ko00660	C5-Branched dibasic acid metabolism	2/38	4/219	0.139989	1	pme2380;Zmzn000113	C00026+C03618	2	8/3751	50/21523	0.662481	1	LITCHI011549.m1;LITCHI018771.m1;LITCHI028378.m2;LITCHI004389.m1;LITCHI012599.m1;LITCHI025692.m1;LITCHI015197.m2;LITCHI022770.m1	K00052+K00052+K00052+K00549+K01652+K00549+K01703+K01704	8
ko00040	Pentose and glucuronate interconversions	1/38	8/219	0.788205	1	pme2380	C00026	1	72/3751	434/21523	0.698158	1	LITCHI018341.m1;LITCHI018342.m1;LITCHI009264.m1;LITCHI009266.m1;LITCHI001937.m1;LITCHI009263.m1;LITCHI010748.m1;LITCHI008052.m1;LITCHI009060.m1;LITCHI004011.m1;LITCHI004225.m1;LITCHI007542.m1;LITCHI007634.m1;LITCHI009125.m1;LITCHI009126.m1;LITCHI009127.m1;LITCHI009129.m1;LITCHI009644.m1;LITCHI009646.m1;LITCHI012494.m1;LITCHI017449.m1;LITCHI017488.m1;LITCHI017724.m4;LITCHI018792.m1;LITCHI018792.m2…	K00002+K00002+K00008+K00008+K00011+K00699+K00854+K00963+K10268+K15718+K01051+K01051+K01051+K01051+K01051+K01051+K01051+K01051+K01051+K01051+K01051+K01051+K01051+K01051+K01051+K01051+K01369+K01051+K01051+K01051+K01051+K01051+K17345+K17345+K01184+K01184+K01184+K01184+K01184+K17345+K01213+K01213+K01213+K01213+K01213+K01213+K01213+K01184+K01184+K01184+K01184+K01213+K22686+K01728+K01728+K00784+K01728+…	72
ko00770	Pantothenate and CoA biosynthesis	1/38	7/219	0.741951	1	Lmgn000160	C02642	1	30/3751	188/21523	0.731605	1	LITCHI020941.m1;LITCHI004975.m4;LITCHI006531.m1;LITCHI006531.m6;LITCHI011264.m1;LITCHI014486.m1;LITCHI020434.m1;LITCHI020508.m1;LITCHI020508.m2;LITCHI022360.m1;LITCHI002471.m1;LITCHI002471.m5;LITCHI007122.m1;LITCHI010769.m1;LITCHI001268.m1;LITCHI023740.m1;LITCHI023740.m2;LITCHI026891.m1;LITCHI022556.m1;LITCHI004389.m1;LITCHI012599.m1;LITCHI025692.m1;LITCHI025874.m1;LITCHI010381.m1;LITCHI010383.m1…	K00053+K00128+K00128+K00128+K00128+K00128+K17345+K00128+K00128+K00128+K00606+K00606+K00826+K00826+K01431+K01464+K01464+K01513+K01598+K00549+K01652+K00549+K01918+K01922+K01922+K01922+K06133+K09680+K02293+K17839	30
ko00310	Lysine degradation	2/38	10/219	0.543544	1	pme0120;pme2380	C00431+C00026	2	47/3751	296/21523	0.781861	1	LITCHI004975.m4;LITCHI006531.m1;LITCHI006531.m6;LITCHI011264.m1;LITCHI014486.m1;LITCHI020434.m1;LITCHI020508.m1;LITCHI020508.m2;LITCHI022360.m1;BGI_novel_G000088;LITCHI029812.m1;LITCHI021314.m1;LITCHI006720.m1;LITCHI006720.m3;LITCHI025971.m2;LITCHI008506.m1;LITCHI008515.m1;LITCHI020836.m2;LITCHI020836.m3;LITCHI009835.m1;LITCHI011303.m2;LITCHI011303.m4;LITCHI011509.m1;LITCHI017659.m1;LITCHI026561.…	K00128+K00128+K00128+K00128+K00128+K17345+K00128+K00128+K00128+K00306+K00626+K00658+K11419+K11419+K11420+K11420+K11420+K11420+K11420+K11422+K11423+K11423+K11423+K00627+K11430+K11420+K14085+K14085+K14085+K14085+K14085+K14157+K14157+K14157+K14157+K14157+K14157+K18826+K12309+K12309+K12309+K12309+K12309+K12309+K12309+K14638+K22748	47
ko00220	Arginine biosynthesis	3/38	10/219	0.241123	1	pme2380;Zmyn000155;pme0008	C00026+C00437+C00327	3	16/3751	113/21523	0.852291	1	LITCHI020203.m1;LITCHI030012.m1;LITCHI016926.m1;LITCHI029890.m1;LITCHI028276.m1;LITCHI004722.m1;LITCHI008105.m1;LITCHI018686.m1;LITCHI022601.m1;LITCHI025248.m1;LITCHI023559.m1;LITCHI024480.m1;LITCHI016773.m1;LITCHI017131.m1;LITCHI018050.m1;LITCHI020904.m1	K00261+K00262+K00811+K00814+K00818+K01427+K01915+K01915+K01940+K14326+K13427+K13427+K14454+K14454+K14455+K14455	16
ko00300	Lysine biosynthesis	2/38	7/219	0.349717	1	pme2380;pme0278	C00026+C00666	2	6/3751	49/21523	0.877809	1	LITCHI005872.m3;LITCHI020829.m1;LITCHI019422.m1;LITCHI018870.m1;LITCHI018870.m5;LITCHI011840.m1	K00133+K00928+K01714+K10206+K10206+K12524	6
ko00998	Biosynthesis of various secondary metabolites - part 2	1/38	6/219	0.685918	1	Zmzn000079	C00279	1	1/3751	15/21523	0.943499	1	LITCHI019770.m1	K21568	1
ko00290	Valine, leucine and isoleucine biosynthesis	2/38	8/219	0.418173	1	Lmbn001676;pmb3101	C14463+C02504	2	12/3751	108/21523	0.974267	1	LITCHI011549.m1;LITCHI018771.m1;LITCHI028378.m2;LITCHI020941.m1;LITCHI007122.m1;LITCHI010769.m1;LITCHI004389.m1;LITCHI012599.m1;LITCHI025692.m1;LITCHI015197.m2;LITCHI022770.m1;LITCHI018746.m1	K00052+K00052+K00052+K00053+K00826+K00826+K00549+K01652+K00549+K01703+K01704+K01754	12
ko00240	Pyrimidine metabolism	4/38	18/219	0.381836	1	mws0572;Lmgn000160;pme0264;mws0976	C02376+C02642+C00214+C02067	4	36/3751	282/21523	0.987051	1	LITCHI021439.m1;LITCHI020729.m1;LITCHI023276.m2;LITCHI021935.m1;LITCHI022577.m1;LITCHI025346.m4;LITCHI020691.m1;LITCHI027054.m4;LITCHI014618.m1;LITCHI018823.m1;LITCHI001268.m1;LITCHI023740.m1;LITCHI023740.m2;LITCHI021029.m1;LITCHI017635.m1;LITCHI005177.m1;LITCHI014627.m1;LITCHI017849.m1;LITCHI023858.m1;LITCHI026891.m1;LITCHI008688.m1;LITCHI026526.m2;LITCHI028537.m1;LITCHI024751.m1;LITCHI007624.m3…	K00857+K00876+K00876+K00940+K00940+K00940+K00943+K01081+K01240+K01240+K01431+K01464+K01464+K01465+K01489+K01510+K01510+K01510+K01510+K01513+K01520+K01937+K01937+K01955+K01956+K01956+K03787+K09903+K09903+K10807+K10808+K13421+K13800+K16904+K16904+K16904	36
ko00760	Nicotinate and nicotinamide metabolism	1/38	11/219	0.883631	1	pme3011	C00334	1	13/3751	129/21523	0.993185	1	LITCHI006902.m1;LITCHI006902.m4;LITCHI005752.m2;LITCHI027054.m4;LITCHI014618.m1;LITCHI018823.m1;LITCHI026891.m1;LITCHI022501.m1;LITCHI017603.m1;LITCHI016134.m3;LITCHI026712.m1;LITCHI026712.m2;LITCHI026712.m3	K00763+K00763+K00767+K01081+K01240+K01240+K01513+K03517+K03787+K06210+K18551+K18551+K18551	13
ko01210	2-Oxocarboxylic acid metabolism	4/38	23/219	0.59323	1	pme2380;Lmbn001676;Zmyn000155;pmb3101	C00026+C14463+C00437+C02504	4	37/3751	304/21523	0.995482	1	LITCHI002158.m1;LITCHI008074.m4;LITCHI018183.m1;LITCHI020560.m2;LITCHI011549.m1;LITCHI018771.m1;LITCHI028378.m2;LITCHI020941.m1;LITCHI005872.m3;LITCHI016926.m1;LITCHI029890.m1;LITCHI028276.m1;LITCHI007122.m1;LITCHI010769.m1;LITCHI020829.m1;LITCHI004325.m2;LITCHI004389.m1;LITCHI012599.m1;LITCHI025692.m1;LITCHI006396.m3;LITCHI014061.m1;LITCHI014065.m1;LITCHI014085.m1;LITCHI014090.m1;LITCHI014102.m1…	K00030+K00031+K00031+K00031+K00052+K00052+K00052+K00053+K00133+K00811+K00814+K00818+K00826+K00826+K00928+K01647+K00549+K01652+K00549+K01681+K01681+K01681+K01681+K01681+K01681+K01681+K01681+K01681+K01681+K01703+K01704+K11820+K09566+K14454+K14454+K14455+K14455	37

## Sheet: Table S8
	Table S8. KEGG enrichment analysis results of DEGs between HZS1 and HZS3.
KEGG_map	Description	DiffRatio_meta	BgRatio_meta	P-value_meta	Adjusted P-value_meta	Index_meta	CID_meta	Count_meta	DiffRatio_gene	BgRatio_gene	P-value_gene	Adjusted P-value_gene	Index_gene	KO_gene	Count_gene
ko00270	Cysteine and methionine metabolism	7/98	14/218	0.451339	1	pme0057;mws1050;pme1210;pme2890;pme1474;pme1086;pme1286	C00155+C00979+C00073+C01817+C00170+C00051+C00021	7	129/4627	409/21523	1.17919e-06	0.000165086	LITCHI022806.m1;LITCHI022806.m3;LITCHI022806.m5;LITCHI022806.m6;LITCHI022806.m7;LITCHI022806.m8;BGI_novel_G000113;LITCHI010718.m1;LITCHI015317.m1;LITCHI015317.m2;LITCHI029791.m1;LITCHI029791.m2;LITCHI007138.m1;LITCHI012987.m1;LITCHI012990.m1;LITCHI023445.m1;LITCHI023445.m2;LITCHI023445.m3;LITCHI029073.m1;LITCHI001542.m1;LITCHI010918.m1;LITCHI031625.m1;LITCHI005872.m3;LITCHI014858.m1;LITCHI026184.…	K00016+K00016+K00016+K00016+K00016+K00016+K00025+K00025+K00025+K00025+K04773+K04773+K00026+K00026+K00026+K00026+K00026+K00026+K00026+K00058+K00058+K00058+K00133+K00547+K00547+K00549+K00549+K00549+K22733+K00549+K00549+K00549+K00549+K00549+K21343+K00549+K00558+K00558+K00558+K00558+K00558+K00640+K00640+K19892+K00789+K00789+K00789+K00789+K00789+K00789+K00789+K00797+K00797+K00797+K00797+K00811+K00815+…	129
ko00620	Pyruvate metabolism	5/98	7/218	0.148387	1	mws0376;mws0192;mws2125;Zmgn001448;pmb3101	C00122+C00042+C00074+C05994+C02504	5	125/4627	396/21523	1.63802e-06	0.000229323	LITCHI007374.m1;LITCHI005883.m2;LITCHI018341.m1;LITCHI018342.m1;LITCHI022806.m1;LITCHI022806.m3;LITCHI022806.m5;LITCHI022806.m6;LITCHI022806.m7;LITCHI022806.m8;BGI_novel_G000113;LITCHI010718.m1;LITCHI015317.m1;LITCHI015317.m2;LITCHI029791.m1;LITCHI029791.m2;LITCHI007138.m1;LITCHI012987.m1;LITCHI012990.m1;LITCHI023445.m1;LITCHI023445.m2;LITCHI023445.m3;LITCHI029073.m1;LITCHI025296.m1;LITCHI025661.…	K00121+K00002+K00002+K00002+K00016+K00016+K00016+K00016+K00016+K00016+K00025+K00025+K00025+K00025+K04773+K04773+K00026+K00026+K00026+K00026+K00026+K00026+K00026+K00028+K00028+K00029+K00029+K00029+K00029+K00029+K00029+K19525+K00121+K00121+K00121+K00121+K00121+K00121+K00128+K00128+K00128+K00128+K00128+K00128+K17345+K00128+K00128+K00128+K00161+K00161+K00161+K00161+K00162+K00162+K00162+K00382+K00382+…	125
ko01212	Fatty acid metabolism	1/98	1/218	0.449541	1	pme1975	C00383	1	80/4627	239/21523	1.14342e-05	0.00160079	LITCHI000864.m1;LITCHI003330.m1;LITCHI003412.m1;LITCHI004740.m1;LITCHI008624.m1;LITCHI019135.m1;LITCHI024137.m1;LITCHI007330.m4;LITCHI007964.m1;LITCHI018187.m1;LITCHI018188.m1;LITCHI020974.m1;LITCHI022760.m1;LITCHI014454.m1;LITCHI021501.m1;LITCHI029812.m1;LITCHI025213.m1;LITCHI012517.m1;LITCHI022821.m1;LITCHI025375.m1;LITCHI025375.m2;LITCHI025375.m3;LITCHI004040.m1;LITCHI004040.m11;LITCHI004040.m…	K00059+K00059+K00059+K00059+K00059+K00208+K00208+K18643+K00232+K00232+K00232+K00232+K00232+K00249+K00626+K00626+K00645+K00648+K00648+K01074+K01074+K01074+K01897+K01897+K01897+K01897+K01897+K01897+K01897+K01897+K01897+K01897+K01897+K01897+K01897+K01897+K01897+K01897+K01897+K01962+K01962+K02160+K02160+K02160+K02160+K02160+K02160+K02372+K02372+K03921+K03921+K03921+K07513+K07513+K07513+K07513+K09458+…	80
ko00010	Glycolysis / Gluconeogenesis	1/98	5/218	0.951356	1	mws2125	C00074	1	142/4627	492/21523	6.15369e-05	0.00861517	LITCHI007374.m1;LITCHI005883.m2;LITCHI018341.m1;LITCHI018342.m1;LITCHI022806.m1;LITCHI022806.m3;LITCHI022806.m5;LITCHI022806.m6;LITCHI022806.m7;LITCHI022806.m8;LITCHI003007.m2;LITCHI003009.m1;LITCHI003010.m1;LITCHI003012.m1;LITCHI010022.m1;LITCHI025927.m1;LITCHI004975.m2;LITCHI004975.m4;LITCHI006531.m1;LITCHI006531.m6;LITCHI011264.m1;LITCHI014486.m1;LITCHI020434.m1;LITCHI020508.m1;LITCHI020508.m2…	K00121+K00002+K00002+K00002+K00016+K00016+K00016+K00016+K00016+K00016+K00121+K00121+K00121+K00121+K00121+K00121+K00128+K00128+K00128+K00128+K00128+K00128+K17345+K00128+K00128+K00128+K00131+K00134+K00134+K00134+K00161+K00161+K00161+K00161+K00162+K00162+K00162+K00382+K00382+K00627+K00627+K00627+K00627+K00627+K00844+K00844+K00844+K00844+K00844+K00844+K00844+K00844+K00844+K00844+K00850+K00850+K00850+…	142
ko00710	Carbon fixation in photosynthetic organisms	1/98	9/218	0.995966	1	mws2125	C00074	1	74/4627	231/21523	0.000119811	0.0167735	BGI_novel_G000113;LITCHI010718.m1;LITCHI015317.m1;LITCHI015317.m2;LITCHI029791.m1;LITCHI029791.m2;LITCHI007138.m1;LITCHI012987.m1;LITCHI012990.m1;LITCHI023445.m1;LITCHI023445.m2;LITCHI023445.m3;LITCHI029073.m1;LITCHI025296.m1;LITCHI025661.m1;LITCHI017210.m2;LITCHI017210.m3;LITCHI017210.m4;LITCHI017745.m1;LITCHI017745.m5;LITCHI030478.m1;LITCHI004745.m1;LITCHI009737.m1;LITCHI022581.m1;LITCHI009142.…	K00025+K00025+K00025+K00025+K04773+K04773+K00026+K00026+K00026+K00026+K00026+K00026+K00026+K00028+K00028+K00029+K00029+K00029+K00029+K00029+K00029+K00134+K00134+K00134+K00615+K00615+K00615+K00615+K00814+K00855+K00927+K00927+K00927+K01100+K01100+K01595+K01595+K01595+K01595+K01595+K01595+K01595+K01595+K01595+K01595+K01595+K01602+K01610+K01610+K01623+K01623+K01623+K01285+K01623+K01623+K01783+K01803+…	74
ko00330	Arginine and proline metabolism	7/98	11/218	0.166788	1	ML10198895;pme3011;pme0006;pme0120;pme2527;pme0295;pme0014	C00213+C00334+C00148+C00431+C00077+C02946+C00025	7	77/4627	246/21523	0.00020217	0.0283038	LITCHI004975.m2;LITCHI004975.m4;LITCHI006531.m1;LITCHI006531.m6;LITCHI011264.m1;LITCHI014486.m1;LITCHI020434.m1;LITCHI020508.m1;LITCHI020508.m2;LITCHI022360.m1;LITCHI016328.m1;LITCHI022186.m1;LITCHI019295.m1;LITCHI001478.m1;LITCHI006395.m1;LITCHI006395.m2;LITCHI006395.m3;LITCHI006395.m4;LITCHI006395.m5;LITCHI006896.m1;LITCHI009367.m1;LITCHI010060.m1;LITCHI010963.m2;LITCHI017938.m1;LITCHI004977.m1…	K00128+K00128+K00128+K00128+K00128+K00128+K17345+K00128+K00128+K00128+K00286+K00294+K00318+K00472+K00472+K00472+K00472+K00472+K00472+K19042+K00472+K00472+K19042+K00472+K00797+K00797+K00797+K00797+K00811+K00819+K01426+K01426+K01426+K01426+K01426+K01426+K01426+K01426+K01426+K01426+K01426+K11838+K03006+K01476+K01583+K01611+K01611+K01611+K10536+K12259+K12657+K12657+K13366+K13427+K13427+K14085+K14085+…	77
ko00071	Fatty acid degradation	1/98	2/218	0.698136	1	pme0243	C00489	1	65/4627	205/21523	0.000410412	0.0574576	LITCHI007374.m1;LITCHI003007.m2;LITCHI003009.m1;LITCHI003010.m1;LITCHI003012.m1;LITCHI010022.m1;LITCHI025927.m1;LITCHI004975.m2;LITCHI004975.m4;LITCHI006531.m1;LITCHI006531.m6;LITCHI011264.m1;LITCHI014486.m1;LITCHI020434.m1;LITCHI020508.m1;LITCHI020508.m2;LITCHI022360.m1;LITCHI007330.m4;LITCHI007964.m1;LITCHI018187.m1;LITCHI018188.m1;LITCHI020974.m1;LITCHI022760.m1;LITCHI014454.m1;LITCHI021501.m1…	K00121+K00121+K00121+K00121+K00121+K00121+K00121+K00128+K00128+K00128+K00128+K00128+K00128+K17345+K00128+K00128+K00128+K18643+K00232+K00232+K00232+K00232+K00232+K00249+K00626+K00626+K01897+K01897+K01897+K01897+K01897+K01897+K01897+K01897+K01897+K01897+K01897+K01897+K01897+K01897+K01897+K01897+K01897+K07425+K07513+K07513+K07513+K07513+K07517+K10527+K10527+K14085+K14085+K14085+K14085+K14085+K14085+…	65
ko00340	Histidine metabolism	3/98	7/218	0.685846	1	pme2380;pme0014;mws0254	C00026+C00025+C00135	3	27/4627	70/21523	0.000855821	0.119815	LITCHI028657.m1;LITCHI028657.m3;LITCHI004975.m2;LITCHI004975.m4;LITCHI006531.m1;LITCHI006531.m6;LITCHI011264.m1;LITCHI014486.m1;LITCHI020434.m1;LITCHI020508.m1;LITCHI020508.m2;LITCHI022360.m1;LITCHI000122.m1;LITCHI011626.m3;LITCHI013925.m1;LITCHI014794.m1;LITCHI014797.m1;LITCHI018855.m1;LITCHI018855.m5;LITCHI030211.m1;LITCHI030211.m2;LITCHI030211.m3;LITCHI030211.m4;LITCHI030211.m6;LITCHI030211.m7…	K00013+K00013+K00128+K00128+K00128+K00128+K00128+K00128+K17345+K00128+K00128+K00128+K00765+K00817+K01663+K01693+K01693+K01814+K01814+K14085+K14085+K14085+K14085+K14085+K14085+K18649+K19787	27
ko01100	Metabolic pathways	90/98	185/218	0.00708514	0.545556	ML10198895;pme3033;pme3011;pme1975;pme0006;mws0376;mws0256;pme0120;mws0192;mws0470;mws0133;pme0490;mws0236;pmb0302;pme0274;mws0227;mws0258;pme0243;Lmgn000160;pme2527;pme0057;pme0040;pme0033;pme1002;pme0295;pme2380;pme0193;pme0026;mws1050;Zmzn000113;pme0014;pme3154;pme1210;mws0262;pme1109;mws0254;pme2165;Lmbn001467;pme2589;Lmmn001643;mws0344;Zmjp000624;mws2125;pme1383;ML10176345;MA10039492;mws0154…	C00213+C01026+C00334+C00383+C00148+C00122+C00183+C00431+C00042+C02170+C00153+C00253+C00245+C03557+C02378+C00123+C00407+C00489+C02642+C00077+C00155+C00147+C00262+C00483+C02946+C00026+C00064+C00047+C00979+C03618+C00025+C00418+C00073+C00898+C00242+C00135+C00295+C03087+C00322+C01772+C00502+C00250+C00074+C00314+C02637+C05422+C00493+C01042+C00072+C02670+C02504+C01419+C00082+C00624+C00666+C00311+C00296+…	90	2059/4627	9174/21523	0.0019162	0.268269	LITCHI007374.m1;LITCHI005883.m2;LITCHI018341.m1;LITCHI018342.m1;LITCHI009266.m1;LITCHI001937.m1;LITCHI019406.m1;LITCHI023391.m1;LITCHI023391.m2;LITCHI023391.m3;LITCHI023391.m4;LITCHI028657.m1;LITCHI028657.m3;LITCHI022806.m1;LITCHI022806.m3;LITCHI022806.m5;LITCHI022806.m6;LITCHI022806.m7;LITCHI022806.m8;LITCHI000274.m1;LITCHI017731.m1;LITCHI002211.m1;LITCHI002211.m2;LITCHI006290.m1;LITCHI009869.m1…	K00121+K00002+K00002+K00002+K00008+K00011+K00012+K00012+K00012+K00012+K00012+K00013+K00013+K00016+K00016+K00016+K00016+K00016+K00016+K00020+K00020+K00021+K00021+K00021+K00021+K00025+K00025+K00025+K00025+K04773+K04773+K00026+K00026+K00026+K00026+K00026+K00026+K00026+K00028+K00028+K00029+K00029+K00029+K00029+K00029+K00029+K00030+K00030+K00031+K00031+K00031+K00031+K00033+K00033+K00036+K00036+K00036+…	2059
ko00250	Alanine, aspartate and glutamate metabolism	7/98	12/218	0.253818	1	pme3011;mws0376;mws0192;pme2380;pme0193;pme0014;pme2559	C00334+C00122+C00042+C00026+C00064+C00025+C01042	7	49/4627	155/21523	0.0021105	0.295471	LITCHI003343.m10;LITCHI003343.m14;LITCHI003343.m2;LITCHI003343.m3;LITCHI003343.m8;LITCHI003343.m9;LITCHI020203.m1;LITCHI030012.m1;LITCHI009631.m1;LITCHI020527.m1;LITCHI020527.m2;LITCHI020527.m3;LITCHI022186.m1;LITCHI016926.m1;LITCHI029890.m1;LITCHI002454.m1;LITCHI007835.m1;LITCHI018060.m1;LITCHI008117.m1;LITCHI008117.m2;LITCHI008117.m3;LITCHI020148.m2;LITCHI006160.m1;LITCHI008105.m1;LITCHI018686.…	K00261+K00261+K00261+K00261+K00261+K00261+K00261+K00262+K00264+K00278+K00278+K00278+K00294+K00811+K00814+K00820+K00827+K00827+K01580+K01580+K01580+K01580+K01915+K01915+K01915+K01939+K01939+K01939+K01939+K01953+K01953+K01953+K13783+K02875+K01953+K01956+K01956+K01956+K13051+K13566+K13566+K13566+K14272+K14454+K14455+K14455+K14455+K16871+K17761	49
ko01200	Carbon metabolism	9/98	21/218	0.665468	1	mws0376;mws0192;pme2380;mws1050;Zmzn000113;pme0014;mws2125;Zmyn000453;pme0534	C00122+C00042+C00026+C00979+C03618+C00025+C00074+C00311+C00257	9	268/4627	1075/21523	0.00314644	0.440502	BGI_novel_G000113;LITCHI010718.m1;LITCHI015317.m1;LITCHI015317.m2;LITCHI029791.m1;LITCHI029791.m2;LITCHI007138.m1;LITCHI012987.m1;LITCHI012990.m1;LITCHI023445.m1;LITCHI023445.m2;LITCHI023445.m3;LITCHI029073.m1;LITCHI025296.m1;LITCHI025661.m1;LITCHI017210.m2;LITCHI017210.m3;LITCHI017210.m4;LITCHI017745.m1;LITCHI017745.m5;LITCHI030478.m1;LITCHI006357.m2;LITCHI018601.m1;LITCHI008074.m1;LITCHI008074.…	K00025+K00025+K00025+K00025+K04773+K04773+K00026+K00026+K00026+K00026+K00026+K00026+K00026+K00028+K00028+K00029+K00029+K00029+K00029+K00029+K00029+K00030+K00030+K00031+K00031+K00031+K00031+K00033+K00033+K00036+K00036+K00036+K00058+K00058+K00058+K00074+K00121+K00121+K00121+K00121+K00121+K00121+K00122+K00122+K00131+K00134+K00134+K00134+K00140+K00140+K00161+K00161+K00161+K00161+K00162+K00162+K00162+…	268
ko00061	Fatty acid biosynthesis	1/98	5/218	0.951356	1	pme1975	C00383	1	50/4627	166/21523	0.00564876	0.790826	LITCHI000864.m1;LITCHI003330.m1;LITCHI003412.m1;LITCHI004740.m1;LITCHI008624.m1;LITCHI019135.m1;LITCHI024137.m1;LITCHI025213.m1;LITCHI012517.m1;LITCHI022821.m1;LITCHI004040.m1;LITCHI004040.m11;LITCHI004040.m2;LITCHI004040.m3;LITCHI004040.m4;LITCHI004040.m7;LITCHI011239.m1;LITCHI011239.m2;LITCHI011239.m4;LITCHI011239.m5;LITCHI014759.m2;LITCHI014958.m1;LITCHI014958.m2;LITCHI021507.m1;LITCHI021943.m…	K00059+K00059+K00059+K00059+K00059+K00208+K00208+K00645+K00648+K00648+K01897+K01897+K01897+K01897+K01897+K01897+K01897+K01897+K01897+K01897+K01897+K01897+K01897+K01897+K01897+K01897+K01897+K01962+K01962+K02160+K02160+K02160+K02160+K02160+K02160+K02372+K02372+K03921+K03921+K03921+K09458+K09458+K09458+K09458+K09458+K10781+K10782+K11262+K18660+K18660	50
ko00592	alpha-Linolenic acid metabolism	2/98	7/218	0.900893	1	pme1654;Zmyn004548	C08491+C01226	2	46/4627	151/21523	0.00614213	0.859899	LITCHI006953.m1;LITCHI026964.m1;LITCHI007330.m4;LITCHI007964.m1;LITCHI018187.m1;LITCHI018188.m1;LITCHI020974.m1;LITCHI022760.m1;LITCHI004723.m1;LITCHI004723.m6;LITCHI021614.m1;LITCHI024086.m1;LITCHI024087.m1;LITCHI024088.m1;LITCHI024090.m1;LITCHI011121.m1;LITCHI011712.m1;LITCHI011713.m1;LITCHI017545.m2;LITCHI015113.m1;LITCHI015113.m2;LITCHI015113.m3;LITCHI025884.m1;LITCHI006590.m1;LITCHI027531.m1…	K00224+K00224+K18643+K00232+K00232+K00232+K00232+K00232+K00454+K00454+K00454+K00454+K00454+K00454+K00454+K01723+K05894+K05894+K05894+K07513+K07513+K07513+K07513+K21483+K21483+K10525+K10526+K10526+K10526+K10527+K10527+K10528+K14674+K14674+K16818+K16818+K16818+K16818+K00145+K18857+K18857+K18857+K18857+K18857+K22389+K22389	46
ko00280	Valine, leucine and isoleucine degradation	4/98	5/218	0.127976	1	mws0256;mws0470;mws0227;mws0258	C00183+C02170+C00123+C00407	4	63/4627	223/21523	0.0100598	1	LITCHI000274.m1;LITCHI017731.m1;LITCHI004975.m2;LITCHI004975.m4;LITCHI006531.m1;LITCHI006531.m6;LITCHI011264.m1;LITCHI014486.m1;LITCHI020434.m1;LITCHI020508.m1;LITCHI020508.m2;LITCHI022360.m1;LITCHI007201.m4;LITCHI019858.m1;LITCHI007490.m1;LITCHI011361.m1;LITCHI024310.m1;LITCHI014454.m1;LITCHI024733.m2;LITCHI024733.m3;LITCHI024733.m4;LITCHI024733.m5;LITCHI014314.m1;LITCHI014393.m2;LITCHI021501.m1…	K00020+K00020+K00128+K00128+K00128+K00128+K00128+K00128+K17345+K00128+K00128+K00128+K00140+K00140+K00166+K00166+K00167+K00249+K00253+K00253+K00253+K00253+K00382+K00382+K00626+K00626+K18626+K18626+K00826+K00826+K00826+K18626+K00827+K00827+K01640+K01640+K01640+K01640+K11292+K01968+K01969+K00679+K05605+K05605+K05605+K05605+K05605+K05605+K07513+K07513+K07513+K07513+K19720+K09699+K14085+K14085+K14085+…	63
ko01110	Biosynthesis of secondary metabolites	42/98	85/218	0.17925	1	pme0006;mws0376;mws0256;mws0192;pme0490;mws0227;mws0258;pme2527;pme0057;pme1002;pme2380;pme0026;mws1050;pme0014;pme3154;pme1210;mws0639;mws0254;pme2589;Lmmn001643;mws2125;ML10176345;mws0154;Hmfn000531;pmb3101;mws0250;pme0075;pme0278;Zmyn000453;pme0534;pme2060;mws0282;pme1654;pme1712;mws0668;Zmyn004548;pmb0981;pmb0532;mws0232;pme2117;pmb2922;pme2746	C00148+C00122+C00183+C00042+C00253+C00123+C00407+C00077+C00155+C00483+C00026+C00047+C00979+C00025+C00418+C00073+C00196+C00135+C00322+C01772+C00074+C02637+C00493+C00072+C02504+C00082+C00624+C00666+C00311+C00257+C04083+C00078+C08491+C00449+C01762+C01226+C00020+C00130+C00255+C00008+C00029+C00016	42	1157/4627	5103/21523	0.0104029	1	LITCHI007374.m1;LITCHI005883.m2;LITCHI018341.m1;LITCHI018342.m1;LITCHI028657.m1;LITCHI028657.m3;LITCHI022806.m1;LITCHI022806.m3;LITCHI022806.m5;LITCHI022806.m6;LITCHI022806.m7;LITCHI022806.m8;LITCHI002211.m1;LITCHI002211.m2;LITCHI006290.m1;LITCHI009869.m1;BGI_novel_G000113;LITCHI010718.m1;LITCHI015317.m1;LITCHI015317.m2;LITCHI029791.m1;LITCHI029791.m2;LITCHI007138.m1;LITCHI012987.m1;LITCHI012990.…	K00121+K00002+K00002+K00002+K00013+K00013+K00016+K00016+K00016+K00016+K00016+K00016+K00021+K00021+K00021+K00021+K00025+K00025+K00025+K00025+K04773+K04773+K00026+K00026+K00026+K00026+K00026+K00026+K00026+K00030+K00030+K00031+K00031+K00031+K00031+K00033+K00033+K00036+K00036+K00036+K00052+K00052+K00053+K00053+K00058+K00058+K00058+K00059+K00059+K00059+K00059+K00059+K00083+K00083+K00083+K00083+K00083+…	1157
ko00220	Arginine biosynthesis	6/98	11/218	0.362605	1	mws0376;pme2527;pme2380;pme0193;pme0014;pme0075	C00122+C00077+C00026+C00064+C00025+C00624	6	35/4627	113/21523	0.0117769	1	LITCHI001691.m1;LITCHI006889.m1;LITCHI014936.m1;LITCHI020912.m1;LITCHI020952.m1;LITCHI003343.m10;LITCHI003343.m14;LITCHI003343.m2;LITCHI003343.m3;LITCHI003343.m8;LITCHI003343.m9;LITCHI020203.m1;LITCHI030012.m1;LITCHI010264.m1;LITCHI010264.m2;LITCHI018429.m1;LITCHI016926.m1;LITCHI029890.m1;LITCHI028276.m1;LITCHI017815.m1;LITCHI004722.m1;LITCHI020414.m3;LITCHI025524.m1;LITCHI006160.m1;LITCHI008105.…	K00145+K16818+K16818+K00145+K00145+K00261+K00261+K00261+K00261+K00261+K00261+K00261+K00262+K00611+K00611+K00620+K00811+K00814+K00818+K14396+K01427+K01438+K01476+K01915+K01915+K01915+K13427+K13427+K14272+K14454+K14455+K14455+K14455+K14677+K14682	35
ko00561	Glycerolipid metabolism	1/98	4/218	0.91026	1	pmb2922	C00029	1	81/4627	303/21523	0.0169608	1	LITCHI005883.m2;LITCHI018341.m1;LITCHI018342.m1;LITCHI001937.m1;LITCHI004975.m2;LITCHI004975.m4;LITCHI006531.m1;LITCHI006531.m6;LITCHI011264.m1;LITCHI014486.m1;LITCHI020434.m1;LITCHI020508.m1;LITCHI020508.m2;LITCHI022360.m1;LITCHI014012.m1;LITCHI014013.m1;LITCHI014017.m1;LITCHI016088.m1;LITCHI027134.m1;LITCHI017566.m1;LITCHI025990.m1;LITCHI029474.m1;LITCHI030293.m1;LITCHI022991.m3;LITCHI016350.m1…	K00002+K00002+K00002+K00011+K00128+K00128+K00128+K00128+K00128+K00128+K17345+K00128+K00128+K00128+K13509+K13509+K13509+K05391+K13195+K00679+K00679+K00679+K00679+K00863+K00875+K00864+K00901+K00901+K00901+K00901+K00901+K00901+K00901+K01054+K01054+K01054+K01054+K01054+K03715+K03715+K06118+K06119+K07407+K07407+K07407+K07407+K07407+K07407+K09480+K09480+K11155+K11155+K13508+K13508+K13513+K13519+K13523+…	81
ko01230	Biosynthesis of amino acids	25/98	43/218	0.0386816	1	pme0006;mws0256;mws0227;mws0258;pme2527;pme0057;pme2380;pme0193;pme0026;mws1050;pme0014;pme1210;mws0254;pme2589;mws2125;ML10176345;mws0154;pmb3101;mws0250;pme0075;pme0278;Zmyn000453;mws0282;pme1712;pme1286	C00148+C00183+C00123+C00407+C00077+C00155+C00026+C00064+C00047+C00979+C00025+C00073+C00135+C00322+C00074+C02637+C00493+C02504+C00082+C00624+C00666+C00311+C00078+C00449+C00021	25	232/4627	961/21523	0.023783	1	LITCHI028657.m1;LITCHI028657.m3;LITCHI006357.m2;LITCHI018601.m1;LITCHI008074.m1;LITCHI008074.m2;LITCHI009808.m1;LITCHI020560.m2;LITCHI018771.m1;LITCHI028378.m2;LITCHI020938.m1;LITCHI029048.m1;LITCHI001542.m1;LITCHI010918.m1;LITCHI031625.m1;LITCHI005872.m3;LITCHI004745.m1;LITCHI009737.m1;LITCHI022581.m1;LITCHI001691.m1;LITCHI006889.m1;LITCHI014936.m1;LITCHI020912.m1;LITCHI020952.m1;LITCHI015553.m1…	K00013+K00013+K00030+K00030+K00031+K00031+K00031+K00031+K00052+K00052+K00053+K00053+K00058+K00058+K00058+K00133+K00134+K00134+K00134+K00145+K16818+K16818+K00145+K00145+K00215+K00264+K00286+K00549+K00549+K00549+K22733+K00549+K00549+K00549+K00549+K00549+K21343+K00549+K00600+K00600+K00600+K00600+K00600+K00600+K00600+K17732+K00611+K00611+K00615+K00615+K00615+K00615+K00616+K00616+K00620+K00640+K00640+…	232
ko00053	Ascorbate and aldarate metabolism	7/98	14/218	0.451339	1	pme2380;ML10171848;MA10039492;Hmfn000531;mws4175;Zmpn000199;pmb2922	C00026+C00652+C05422+C00072+C02670+C00879+C00029	7	61/4627	224/21523	0.0240005	1	LITCHI005883.m2;LITCHI018341.m1;LITCHI018342.m1;LITCHI019406.m1;LITCHI023391.m1;LITCHI023391.m2;LITCHI023391.m3;LITCHI023391.m4;LITCHI026799.m1;LITCHI004975.m2;LITCHI004975.m4;LITCHI006531.m1;LITCHI006531.m6;LITCHI011264.m1;LITCHI014486.m1;LITCHI020434.m1;LITCHI020508.m1;LITCHI020508.m2;LITCHI022360.m1;BGI_novel_G001218;LITCHI007899.m1;LITCHI011137.m1;LITCHI011138.m1;LITCHI006049.m1;LITCHI006437.…	K00002+K00002+K00002+K00012+K00012+K00012+K00012+K00012+K00103+K00128+K00128+K00128+K00128+K00128+K00128+K17345+K00128+K00128+K00128+K06911+K00423+K06911+K11843+K00434+K00434+K00434+K00434+K00434+K00434+K00434+K00434+K04628+K08232+K08232+K08679+K08679+K04733+K10046+K10046+K10046+K10046+K10046+K10047+K01528+K18195+K01528+K22686+K12447+K14085+K14085+K14085+K14085+K14085+K14085+K14190+K13422+K17744+…	61
ko00380	Tryptophan metabolism	2/98	2/218	0.200947	1	pme2589;mws0282	C00322+C00078	2	70/4627	262/21523	0.0251939	1	LITCHI004975.m2;LITCHI004975.m4;LITCHI006531.m1;LITCHI006531.m6;LITCHI011264.m1;LITCHI014486.m1;LITCHI020434.m1;LITCHI020508.m1;LITCHI020508.m2;LITCHI022360.m1;LITCHI014314.m1;LITCHI014393.m2;LITCHI021501.m1;LITCHI029812.m1;LITCHI013926.m1;LITCHI013926.m3;LITCHI017695.m2;LITCHI021314.m1;LITCHI030740.m1;BGI_novel_G000882;LITCHI001200.m1;LITCHI001978.m1;LITCHI001983.m1;LITCHI001983.m2;LITCHI001985.…	K00128+K00128+K00128+K00128+K00128+K00128+K17345+K00128+K00128+K00128+K00382+K00382+K00626+K00626+K00658+K00658+K00658+K00658+K00837+K01426+K01426+K01426+K01426+K01426+K01426+K01426+K01426+K01426+K01426+K01426+K11838+K03006+K01593+K01593+K01593+K01593+K01593+K01593+K01593+K01593+K01593+K01593+K01593+K03781+K03781+K07409+K11816+K11816+K11816+K11816+K11820+K11820+K13066+K13066+K13066+K13066+K13066+…	70
ko00260	Glycine, serine and threonine metabolism	3/98	8/218	0.783687	1	ML10198895;pme3033;mws0282	C00213+C01026+C00078	3	60/4627	221/21523	0.0265252	1	LITCHI001542.m1;LITCHI010918.m1;LITCHI031625.m1;LITCHI022943.m1;LITCHI022291.m1;LITCHI005872.m3;LITCHI002183.m1;LITCHI004875.m1;LITCHI004876.m1;LITCHI022471.m2;LITCHI022850.m1;LITCHI016562.m1;BGI_novel_G000088;LITCHI021254.m1;LITCHI014314.m1;LITCHI014393.m2;LITCHI016448.m1;LITCHI000391.m1;LITCHI003655.m1;LITCHI010719.m4;LITCHI010719.m5;LITCHI014986.m1;LITCHI014991.m1;LITCHI017257.m1;LITCHI017682.…	K00058+K00058+K00058+K00108+K00130+K00133+K03028+K00276+K00276+K00276+K00276+K00281+K00306+K00306+K00382+K00382+K00499+K00600+K00600+K00600+K00600+K00600+K00600+K00600+K17732+K00605+K00605+K00827+K00827+K00831+K08726+K08726+K01620+K01620+K01620+K01620+K01620+K01695+K01696+K01733+K01754+K01754+K01834+K02437+K06001+K12235+K12524+K12524+K12524+K14085+K14085+K14085+K14085+K14085+K14085+K14272+K15634+…	60
ko00410	beta-Alanine metabolism	4/98	7/218	0.389229	1	pme3011;pme1975;Lmgn000160;mws0254	C00334+C00383+C02642+C00135	4	53/4627	194/21523	0.0315858	1	LITCHI004975.m2;LITCHI004975.m4;LITCHI006531.m1;LITCHI006531.m6;LITCHI011264.m1;LITCHI014486.m1;LITCHI020434.m1;LITCHI020508.m1;LITCHI020508.m2;LITCHI022360.m1;LITCHI007201.m4;LITCHI019858.m1;LITCHI023006.m1;LITCHI007330.m4;LITCHI007964.m1;LITCHI018187.m1;LITCHI018188.m1;LITCHI020974.m1;LITCHI022760.m1;LITCHI002183.m1;LITCHI004875.m1;LITCHI004876.m1;LITCHI022471.m2;LITCHI022850.m1;LITCHI001268.m1…	K00128+K00128+K00128+K00128+K00128+K00128+K17345+K00128+K00128+K00128+K00140+K00140+K00207+K18643+K00232+K00232+K00232+K00232+K00232+K03028+K00276+K00276+K00276+K00276+K01431+K01464+K01464+K01580+K01580+K01580+K01580+K01918+K05605+K05605+K05605+K05605+K05605+K05605+K12259+K13366+K14085+K14085+K14085+K14085+K14085+K14085+K02293+K17839+K17839+K17839+K17839+K17839+K00020	53
ko00640	Propanoate metabolism	3/98	4/218	0.238852	1	mws0206;mws0192;mws0470	C05984+C00042+C02170	3	45/4627	162/21523	0.0344502	1	LITCHI022806.m1;LITCHI022806.m3;LITCHI022806.m5;LITCHI022806.m6;LITCHI022806.m7;LITCHI022806.m8;LITCHI007201.m4;LITCHI019858.m1;LITCHI007490.m1;LITCHI011361.m1;LITCHI024310.m1;LITCHI007330.m4;LITCHI007964.m1;LITCHI018187.m1;LITCHI018188.m1;LITCHI020974.m1;LITCHI022760.m1;LITCHI014314.m1;LITCHI014393.m2;LITCHI021501.m1;LITCHI029812.m1;LITCHI020880.m1;BGI_novel_G000750;LITCHI023532.m1;LITCHI023533.…	K00016+K00016+K00016+K00016+K00016+K00016+K00140+K00140+K00166+K00166+K00167+K18643+K00232+K00232+K00232+K00232+K00232+K00382+K00382+K00626+K00626+K01895+K01899+K01899+K01899+K01899+K01900+K01962+K01962+K02160+K02160+K02160+K02160+K02160+K02160+K05605+K05605+K05605+K05605+K05605+K05605+K19720+K09699+K11262+K00020	45
ko00650	Butanoate metabolism	5/98	7/218	0.148387	1	pme3011;mws0376;mws0192;pme2380;pme0014	C00334+C00122+C00042+C00026+C00025	5	28/4627	94/21523	0.0368571	1	LITCHI013085.m1;LITCHI021501.m1;LITCHI029812.m1;LITCHI008117.m1;LITCHI008117.m2;LITCHI008117.m3;LITCHI020148.m2;LITCHI003121.m1;LITCHI003122.m1;LITCHI014429.m1;LITCHI014429.m2;LITCHI030683.m2;LITCHI004389.m1;LITCHI012599.m1;LITCHI024089.m1;LITCHI025692.m1;LITCHI015623.m1;LITCHI006359.m1;LITCHI006363.m1;LITCHI008072.m1;LITCHI008758.m1;LITCHI009705.m1;LITCHI009975.m1;LITCHI012488.m1;LITCHI019201.m6…	K00074+K00626+K00626+K01580+K01580+K01580+K01580+K01640+K01640+K01640+K01640+K11292+K00549+K01652+K00549+K00549+K01653+K00666+K00666+K23108+K01913+K23108+K00700+K01913+K16871+K17761+K18121+K18121	28
ko00770	Pantothenate and CoA biosynthesis	3/98	7/218	0.685846	1	mws0256;Lmgn000160;pme1261	C00183+C02642+C05944	3	51/4627	188/21523	0.0387295	1	LITCHI020938.m1;LITCHI029048.m1;LITCHI004975.m2;LITCHI004975.m4;LITCHI006531.m1;LITCHI006531.m6;LITCHI011264.m1;LITCHI014486.m1;LITCHI020434.m1;LITCHI020508.m1;LITCHI020508.m2;LITCHI022360.m1;LITCHI023006.m1;LITCHI002471.m1;LITCHI002471.m4;LITCHI005462.m1;LITCHI005462.m2;LITCHI007122.m1;LITCHI007123.m1;LITCHI010771.m1;LITCHI019289.m1;LITCHI001268.m1;LITCHI023740.m1;LITCHI023740.m2;LITCHI008696.m1…	K00053+K00053+K00128+K00128+K00128+K00128+K00128+K00128+K17345+K00128+K00128+K00128+K00207+K00606+K00606+K18626+K18626+K00826+K00826+K00826+K18626+K01431+K01464+K01464+K01513+K01513+K01513+K01513+K01513+K01598+K01598+K00549+K01652+K00549+K00549+K01653+K01687+K02356+K02356+K01918+K01922+K01922+K06133+K09680+K09680+K02293+K17839+K17839+K17839+K17839+K17839	51
ko02010	ABC transporters	19/98	40/218	0.426326	1	pme0006;mws0256;mws0236;pmb0302;mws0227;mws0258;pme2527;pme0193;pme0026;pme0014;mws0254;mws0248;pme0230;pme1184;pme1119;pme1178;mws0668;pme1086;mws0232	C00148+C00183+C00245+C03557+C00123+C00407+C00077+C00064+C00047+C00025+C00135+C00299+C00212+C00330+C00294+C00387+C01762+C00051+C00255	19	67/4627	255/21523	0.0389343	1	LITCHI022179.m1;LITCHI022180.m1;LITCHI008826.m1;LITCHI008826.m2;LITCHI025341.m1;LITCHI009272.m1;LITCHI020592.m1;LITCHI023337.m1;BGI_novel_G000236;BGI_novel_G000471;BGI_novel_G000789;BGI_novel_G000796;LITCHI004862.m1;LITCHI010096.m1;LITCHI015288.m2;LITCHI016504.m1;LITCHI016504.m2;LITCHI017962.m1;LITCHI018643.m1;LITCHI018643.m2;LITCHI018643.m3;LITCHI018643.m4;LITCHI020454.m1;LITCHI020470.m1;LITCHI0…	K05643+K05643+K05643+K05643+K05643+K05657+K05656+K05657+K17964+K14326+K14326+K18328+K05278+K05658+K03243+K05658+K05658+K05658+K05658+K05658+K05658+K05658+K05658+K05658+K05658+K14326+K05658+K05658+K05658+K05658+K05658+K12448+K12448+K05658+K05658+K05666+K04079+K05666+K00924+K05665+K05665+K05666+K05666+K05665+K19525+K05666+K05666+K05665+K05666+K05666+K05665+K05665+K05677+K05681+K05681+K05681+K05681+…	67
ko00750	Vitamin B6 metabolism	3/98	7/218	0.685846	1	pme0193;Zmjp000624;pme1383	C00064+C00250+C00314	3	13/4627	39/21523	0.0592287	1	LITCHI003407.m1;LITCHI006354.m1;LITCHI030181.m1;LITCHI002939.m1;LITCHI002960.m1;LITCHI003652.m1;LITCHI020178.m2;LITCHI024662.m1;LITCHI024720.m1;LITCHI017652.m1;LITCHI017655.m1;LITCHI030035.m1;LITCHI030036.m1	K00275+K00831+K01733+K05275+K05275+K17744+K05275+K08681+K08681+K15084+K13248+K13248+K13248	13
ko01240	Biosynthesis of cofactors	32/98	47/218	0.000289427	0.0222859	mws0256;mws0133;pme0490;pme1002;pme2380;pme0193;pme0014;pme1210;pme2165;pme2589;Zmjp000624;mws2125;pme1383;ML10176345;mws0154;Hmfn000531;mws0250;Zmyn000453;mws0282;pme2289;pme1086;pme3188;pmb0981;pmb0532;mws0232;pme1286;pme2117;pmb2922;mws4134;pmb0530;pme2651;pme2746	C00183+C00153+C00253+C00483+C00026+C00064+C00025+C00073+C00295+C00322+C00250+C00074+C00314+C02637+C00493+C00072+C00082+C00311+C00078+C00473+C00051+C00105+C00020+C00130+C00255+C00021+C00008+C00029+C00127+C00003+C00006+C00016	32	220/4627	937/21523	0.0719877	1	LITCHI005883.m2;LITCHI018341.m1;LITCHI018342.m1;LITCHI019406.m1;LITCHI023391.m1;LITCHI023391.m2;LITCHI023391.m3;LITCHI023391.m4;LITCHI000864.m1;LITCHI003330.m1;LITCHI003412.m1;LITCHI004740.m1;LITCHI008624.m1;LITCHI026799.m1;LITCHI004975.m2;LITCHI004975.m4;LITCHI006531.m1;LITCHI006531.m6;LITCHI011264.m1;LITCHI014486.m1;LITCHI020434.m1;LITCHI020508.m1;LITCHI020508.m2;LITCHI022360.m1;LITCHI019135.m1…	K00002+K00002+K00002+K00012+K00012+K00012+K00012+K00012+K00059+K00059+K00059+K00059+K00059+K00103+K00128+K00128+K00128+K00128+K00128+K00128+K17345+K00128+K00128+K00128+K00208+K00208+K00228+K00228+K00231+K00254+K00275+K00278+K00278+K00278+K00288+K00288+K00288+K00288+K00382+K00382+K00457+K00591+K00600+K00600+K00600+K00600+K00600+K00600+K00600+K17732+K00606+K00606+K04628+K19892+K00789+K00789+K00789+…	220
ko00020	Citrate cycle (TCA cycle)	5/98	7/218	0.148387	1	mws0376;mws0192;pme2380;mws2125;Zmyn000453	C00122+C00042+C00026+C00074+C00311	5	70/4627	279/21523	0.083031	1	BGI_novel_G000113;LITCHI010718.m1;LITCHI015317.m1;LITCHI015317.m2;LITCHI029791.m1;LITCHI029791.m2;LITCHI007138.m1;LITCHI012987.m1;LITCHI012990.m1;LITCHI023445.m1;LITCHI023445.m2;LITCHI023445.m3;LITCHI029073.m1;LITCHI006357.m2;LITCHI018601.m1;LITCHI008074.m1;LITCHI008074.m2;LITCHI009808.m1;LITCHI020560.m2;LITCHI005047.m1;LITCHI005047.m4;LITCHI021806.m1;LITCHI026788.m1;LITCHI004594.m1;LITCHI020277.…	K00025+K00025+K00025+K00025+K04773+K04773+K00026+K00026+K00026+K00026+K00026+K00026+K00026+K00030+K00030+K00031+K00031+K00031+K00031+K00161+K00161+K00161+K00161+K00162+K00162+K00162+K00164+K00164+K00164+K00382+K00382+K00627+K00627+K00627+K00627+K00627+K00658+K00658+K00658+K00658+K01610+K01610+K01647+K01647+K01647+K01648+K01648+K01648+K01648+K01648+K01648+K01648+K01648+K01648+K01648+K01679+K01681+…	70
ko00360	Phenylalanine metabolism	4/98	8/218	0.522777	1	mws0376;mws0192;Lmmn001643;mws0250	C00122+C00042+C01772+C00082	4	46/4627	178/21523	0.094424	1	LITCHI013085.m1;LITCHI002183.m1;LITCHI004875.m1;LITCHI004876.m1;LITCHI022471.m2;LITCHI022850.m1;BGI_novel_G000629;LITCHI016926.m1;LITCHI013063.m1;LITCHI021008.m1;LITCHI011626.m3;BGI_novel_G000882;LITCHI001200.m1;LITCHI001978.m1;LITCHI001983.m1;LITCHI001983.m2;LITCHI001985.m1;LITCHI001986.m1;LITCHI001989.m1;LITCHI003948.m1;LITCHI003952.m1;LITCHI023076.m1;LITCHI025846.m1;LITCHI031781.m1;LITCHI02490…	K00074+K03028+K00276+K00276+K00276+K00276+K00457+K00811+K00815+K00815+K00817+K01426+K01426+K01426+K01426+K01426+K01426+K01426+K01426+K01426+K01426+K01426+K11838+K03006+K01593+K01593+K01593+K01593+K01593+K01593+K01593+K01593+K01593+K01593+K01593+K07253+K07253+K10775+K10775+K14454+K14455+K14455+K14455+K00816+K00816+K18606	46
ko00730	Thiamine metabolism	2/98	2/218	0.200947	1	mws0250;pmb0530	C00082+C00003	2	24/4627	86/21523	0.0962637	1	BGI_novel_G001060;LITCHI010786.m1;LITCHI018526.m1;LITCHI020717.m1;LITCHI022598.m1;LITCHI007204.m1;LITCHI007204.m2;LITCHI014609.m1;LITCHI016334.m1;LITCHI016334.m4;LITCHI013397.m1;LITCHI013400.m1;LITCHI029534.m1;LITCHI025069.m1;LITCHI012498.m2;LITCHI012498.m4;LITCHI014382.m1;LITCHI027346.m1;LITCHI003526.m1;LITCHI003526.m2;LITCHI003526.m5;LITCHI022869.m1;LITCHI022869.m2;LITCHI025955.m1	K15542+K00939+K00939+K00939+K00939+K01662+K01662+K01662+K01662+K01662+K03146+K03146+K03146+K03147+K06949+K06949+K20896+K20896+K22911+K22911+K22911+K22911+K22911+K22911	24
ko00430	Taurine and hypotaurine metabolism	3/98	3/218	0.0893098	1	mws0236;pme2380;pme0014	C00245+C00026+C00025	3	13/4627	42/21523	0.0992098	1	LITCHI008117.m1;LITCHI008117.m2;LITCHI008117.m3;LITCHI020148.m2;LITCHI003402.m1;LITCHI010557.m1;LITCHI017884.m1;LITCHI020913.m1;LITCHI023265.m1;LITCHI029026.m1;LITCHI003077.m1;LITCHI017700.m2;LITCHI030923.m1	K01580+K01580+K01580+K01580+K10712+K10712+K10712+K10712+K10712+K10712+K05387+K18592+K18592	13
ko00940	Phenylpropanoid biosynthesis	2/98	3/218	0.424221	1	Lmmn001643;mws0250	C01772+C00082	2	144/4627	609/21523	0.10497	1	LITCHI001530.m1;LITCHI001530.m2;LITCHI001532.m1;LITCHI007194.m1;LITCHI007653.m1;LITCHI007653.m2;LITCHI007653.m6;LITCHI007654.m3;LITCHI010078.m2;LITCHI015121.m1;LITCHI020006.m1;LITCHI005409.m1;LITCHI006413.m1;LITCHI006553.m2;LITCHI007023.m1;LITCHI007279.m1;LITCHI007326.m1;LITCHI010075.m1;LITCHI011323.m1;LITCHI011513.m1;LITCHI015529.m1;LITCHI016426.m1;LITCHI017984.m1;LITCHI018051.m1;LITCHI018054.m1…	K00083+K00083+K00083+K00083+K00083+K00083+K00083+K00083+K00083+K00083+K00083+K00430+K00430+K00430+K00430+K00430+K00430+K00430+K20870+K00430+K00430+K00430+K00430+K00430+K00430+K00430+K03255+K00430+K00430+K00430+K01528+K00430+K00430+K00430+K00430+K04733+K03006+K03006+K03255+K03255+K00430+K00430+K00430+K00430+K03255+K00430+K00430+K00487+K00487+K00588+K00588+K00588+K00588+K00588+K01188+K01188+K01188+…	144
ko00524	Neomycin, kanamycin and gentamicin biosynthesis	2/98	4/218	0.609591	1	pme0014;pmb2922	C00025+C00029	2	10/4627	33/21523	0.153588	1	LITCHI017728.m1;LITCHI017728.m10;LITCHI017728.m2;LITCHI017728.m3;LITCHI017728.m4;LITCHI017728.m5;LITCHI017728.m6;LITCHI023638.m1;LITCHI030461.m1;LITCHI030461.m2	K00844+K00844+K00844+K00844+K00844+K00844+K00844+K00844+K00844+K00844	10
ko00780	Biotin metabolism	1/98	1/218	0.449541	1	pme0026	C00047	1	16/4627	58/21523	0.165251	1	LITCHI000864.m1;LITCHI003330.m1;LITCHI003412.m1;LITCHI004740.m1;LITCHI008624.m1;LITCHI019135.m1;LITCHI024137.m1;LITCHI015839.m2;LITCHI001178.m1;LITCHI007925.m1;LITCHI007084.m1;LITCHI017490.m2;LITCHI019915.m1;LITCHI021386.m1;LITCHI028839.m1;LITCHI016353.m1	K00059+K00059+K00059+K00059+K00059+K00208+K00208+K01012+K02372+K02372+K09458+K09458+K09458+K09458+K09458+K19562	16
ko00630	Glyoxylate and dicarboxylate metabolism	7/98	11/218	0.166788	1	mws0192;pme2380;pme0193;Zmzn000113;pme0014;mws0262;Zmyn000453	C00042+C00026+C00064+C03618+C00025+C00898+C00311	7	71/4627	297/21523	0.171673	1	BGI_novel_G000113;LITCHI010718.m1;LITCHI015317.m1;LITCHI015317.m2;LITCHI029791.m1;LITCHI029791.m2;LITCHI007138.m1;LITCHI012987.m1;LITCHI012990.m1;LITCHI023445.m1;LITCHI023445.m2;LITCHI023445.m3;LITCHI029073.m1;LITCHI020520.m1;LITCHI020520.m5;LITCHI016562.m1;LITCHI000236.m1;LITCHI008659.m1;LITCHI014314.m1;LITCHI014393.m2;LITCHI000391.m1;LITCHI003655.m1;LITCHI010719.m4;LITCHI010719.m5;LITCHI014986.…	K00025+K00025+K00025+K00025+K04773+K04773+K00026+K00026+K00026+K00026+K00026+K00026+K00026+K00122+K00122+K00281+K00025+K00284+K00382+K00382+K00600+K00600+K00600+K00600+K00600+K00600+K00600+K17732+K00605+K00605+K00626+K00626+K01455+K01569+K01602+K01647+K01647+K01647+K01681+K01681+K01681+K01681+K01681+K01681+K01681+K01681+K01681+K01895+K00666+K00666+K23108+K01913+K23108+K00700+K01913+K01915+K01915+…	71
ko00901	Indole alkaloid biosynthesis	1/98	2/218	0.698136	1	mws0282	C00078	1	11/4627	38/21523	0.176663	1	LITCHI024903.m1;LITCHI025006.m1;LITCHI025007.m1;LITCHI025021.m1;LITCHI025021.m2;LITCHI025028.m1;LITCHI025029.m2;LITCHI025036.m1;LITCHI025037.m1;LITCHI025039.m1;LITCHI025040.m1	K01593+K01593+K01593+K01593+K01593+K01593+K01593+K01593+K01593+K01593+K01593	11
ko00030	Pentose phosphate pathway	1/98	6/218	0.973737	1	pme0534	C00257	1	55/4627	228/21523	0.186135	1	LITCHI005406.m1;LITCHI021996.m1;LITCHI002326.m1;LITCHI002326.m2;LITCHI004617.m1;LITCHI016135.m3;LITCHI009142.m1;LITCHI025527.m1;LITCHI025527.m2;LITCHI025527.m3;LITCHI021712.m1;LITCHI022825.m2;LITCHI007246.m1;LITCHI007246.m2;LITCHI007246.m3;LITCHI008992.m1;LITCHI008992.m2;LITCHI016150.m1;LITCHI017233.m3;LITCHI017702.m1;LITCHI025298.m1;LITCHI028866.m1;LITCHI029849.m1;LITCHI030438.m1;LITCHI030439.m1…	K00033+K00033+K00036+K00036+K00036+K00131+K00615+K00615+K00615+K00615+K00616+K00616+K00850+K00850+K00850+K00850+K00850+K07893+K00850+K00850+K07893+K07893+K00850+K00850+K00850+K00850+K00851+K00852+K00895+K00895+K00895+K00895+K00895+K00948+K00948+K16569+K01057+K01057+K01623+K01623+K01623+K01285+K01623+K01623+K01783+K07478+K15363+K15363+K15363+K01810+K01810+K01051+K03841+K03841+K03841	55
ko00195	Photosynthesis	2/98	2/218	0.200947	1	pme2117;pme2651	C00008+C00006	2	27/4627	108/21523	0.21777	1	LITCHI029631.m1;LITCHI015002.m1;LITCHI021140.m1;LITCHI010048.m1;BGI_novel_G000311;BGI_novel_G000312;LITCHI000429.m1;LITCHI027106.m1;LITCHI006468.m1;LITCHI006468.m2;LITCHI028672.m1;LITCHI026220.m1;LITCHI025919.m1;LITCHI028001.m1;LITCHI021604.m1;LITCHI007476.m1;LITCHI007476.m2;LITCHI006733.m1;LITCHI017086.m2;LITCHI017086.m3;LITCHI004785.m1;LITCHI012558.m1;LITCHI011244.m1;LITCHI005200.m1;LITCHI02595…	K02115+K03686+K02636+K02638+K02639+K02639+K02639+K02639+K02641+K02641+K02641+K02692+K02693+K02694+K02699+K02701+K02701+K02716+K16465+K16465+K02723+K03541+K03542+K08901+K13420+K08905+K14332	27
ko00965	Betalain biosynthesis	1/98	1/218	0.449541	1	mws0250	C00082	1	12/4627	45/21523	0.247526	1	LITCHI024903.m1;LITCHI025006.m1;LITCHI025007.m1;LITCHI025021.m1;LITCHI025021.m2;LITCHI025028.m1;LITCHI025029.m2;LITCHI025036.m1;LITCHI025037.m1;LITCHI025039.m1;LITCHI025040.m1;LITCHI007323.m1	K01593+K01593+K01593+K01593+K01593+K01593+K01593+K01593+K01593+K01593+K01593+K15777	12
ko00480	Glutathione metabolism	8/98	10/218	0.0244831	1	pme2527;pme0014;MA10039492;Hmfn000531;mws0875;pme1086;mws4134;pme2651	C00077+C00025+C05422+C00072+C01419+C00051+C00127+C00006	8	65/4627	279/21523	0.251214	1	LITCHI008074.m1;LITCHI008074.m2;LITCHI009808.m1;LITCHI020560.m2;LITCHI005406.m1;LITCHI021996.m1;LITCHI002326.m1;LITCHI002326.m2;LITCHI004617.m1;LITCHI015083.m1;LITCHI024354.m2;LITCHI026121.m2;LITCHI015847.m1;LITCHI022145.m1;LITCHI026281.m1;LITCHI006049.m1;LITCHI006437.m1;LITCHI010566.m1;LITCHI011263.m1;LITCHI018535.m1;LITCHI024768.m1;LITCHI024768.m2;LITCHI024768.m5;LITCHI004977.m1;LITCHI004977.m2…	K00031+K00031+K00031+K00031+K00033+K00033+K00036+K00036+K00036+K00383+K08867+K00383+K00432+K00432+K00432+K00434+K00434+K00434+K00434+K00434+K00434+K00434+K00434+K00797+K00797+K00797+K00797+K00799+K00799+K00799+K00799+K00799+K00799+K00799+K00799+K00799+K00799+K00799+K00799+K00799+K00799+K00799+K00799+K00799+K00799+K00799+K00799+K01255+K01255+K01255+K01256+K01469+K01469+K01469+K10807+K10807+K10808+…	65
ko00440	Phosphonate and phosphinate metabolism	2/98	3/218	0.424221	1	pmb0302;mws2125	C03557+C00074	2	13/4627	50/21523	0.266354	1	LITCHI002895.m1;LITCHI002895.m2;LITCHI002895.m3;LITCHI002895.m4;LITCHI019659.m1;LITCHI028394.m1;LITCHI028394.m4;LITCHI001906.m1;LITCHI005419.m1;LITCHI005419.m2;LITCHI005419.m3;LITCHI019293.m1;LITCHI030115.m1	K00967+K00967+K00967+K00967+K00967+K00968+K00968+K00993+K00993+K00993+K00993+K00993+K06167	13
ko00230	Purine metabolism	15/98	19/218	0.00182377	0.140431	pme0040;pme0033;pme0193;pme1109;pme0230;pme1184;pme1119;pme1178;mws0668;pme3184;mws0609;pmb0981;pmb0532;pmb0998;pme2117	C00147+C00262+C00064+C00242+C00212+C00330+C00294+C00387+C01762+C00360+C00942+C00020+C00130+C00144+C00008	15	90/4627	394/21523	0.273873	1	LITCHI009740.m4;LITCHI022884.m1;LITCHI002935.m1;LITCHI002935.m2;LITCHI010839.m2;LITCHI016974.m1;LITCHI002904.m1;LITCHI010267.m1;LITCHI018602.m1;LITCHI024430.m1;LITCHI007060.m1;LITCHI007063.m1;LITCHI007063.m14;LITCHI007063.m19;LITCHI007063.m20;LITCHI007063.m3;LITCHI007063.m4;LITCHI001406.m1;LITCHI006026.m1;LITCHI009466.m1;LITCHI018757.m1;LITCHI020380.m1;LITCHI020380.m2;LITCHI020380.m3;LITCHI024313…	K00088+K00602+K00759+K00759+K00759+K00759+K00847+K11883+K00856+K00856+K00860+K00860+K00860+K00860+K00860+K00860+K00860+K00873+K00873+K00873+K00873+K00873+K00873+K00873+K00873+K00873+K00873+K15542+K00939+K00939+K00939+K00939+K00940+K00940+K00940+K00940+K00940+K00940+K00942+K00942+K00948+K00948+K16569+K00951+K00951+K01081+K01427+K01488+K01490+K01490+K01510+K01510+K01510+K01513+K01513+K01513+K01513+…	90
ko00950	Isoquinoline alkaloid biosynthesis	2/98	2/218	0.200947	1	pme1002;mws0250	C00483+C00082	2	25/4627	105/21523	0.31691	1	LITCHI002183.m1;LITCHI004875.m1;LITCHI004876.m1;LITCHI022471.m2;LITCHI022850.m1;LITCHI016926.m1;LITCHI013063.m1;LITCHI021008.m1;LITCHI024903.m1;LITCHI025006.m1;LITCHI025007.m1;LITCHI025021.m1;LITCHI025021.m2;LITCHI025028.m1;LITCHI025029.m2;LITCHI025036.m1;LITCHI025037.m1;LITCHI025039.m1;LITCHI025040.m1;LITCHI017131.m1;LITCHI020904.m1;LITCHI020904.m2;LITCHI020904.m3;LITCHI011229.m1;LITCHI011229.m3	K03028+K00276+K00276+K00276+K00276+K00811+K00815+K00815+K01593+K01593+K01593+K01593+K01593+K01593+K01593+K01593+K01593+K01593+K01593+K14454+K14455+K14455+K14455+K00816+K00816	25
ko00500	Starch and sucrose metabolism	1/98	9/218	0.995966	1	pmb2922	C00029	1	187/4627	843/21523	0.323878	1	LITCHI003031.m1;LITCHI004615.m2;LITCHI011357.m1;LITCHI019416.m2;LITCHI020302.m2;LITCHI008066.m1;LITCHI017476.m1;LITCHI017476.m2;LITCHI017476.m3;LITCHI017476.m4;LITCHI017476.m5;LITCHI017476.m6;LITCHI017476.m8;LITCHI022995.m1;LITCHI026481.m1;LITCHI026481.m2;LITCHI011972.m1;LITCHI016966.m1;LITCHI017302.m1;LITCHI017302.m10;LITCHI017302.m2;LITCHI013915.m1;LITCHI018127.m1;LITCHI007154.m1;LITCHI012429.m…	K18173+K00688+K00688+K00688+K00688+K00695+K00695+K00695+K00695+K00695+K00695+K00695+K00695+K00695+K00695+K00695+K00696+K00696+K00696+K00696+K00696+K00700+K00700+K00703+K00703+K00703+K00703+K00703+K00705+K00705+K00844+K00844+K00844+K00844+K00844+K00844+K00844+K00844+K00844+K00844+K00847+K00847+K00847+K00847+K00847+K00847+K00847+K00847+K00963+K00963+K00975+K00975+K00975+K01087+K01087+K01087+K01087+…	187
ko00520	Amino sugar and nucleotide sugar metabolism	2/98	12/218	0.992967	1	Zmfn000481;pmb2922	C00190+C00029	2	110/4627	491/21523	0.32762	1	LITCHI019406.m1;LITCHI023391.m1;LITCHI023391.m2;LITCHI023391.m3;LITCHI023391.m4;LITCHI016638.m1;LITCHI023861.m1;LITCHI026513.m1;LITCHI002454.m1;LITCHI017728.m1;LITCHI017728.m10;LITCHI017728.m2;LITCHI017728.m3;LITCHI017728.m4;LITCHI017728.m5;LITCHI017728.m6;LITCHI023638.m1;LITCHI030461.m1;LITCHI030461.m2;LITCHI005338.m1;LITCHI008204.m1;LITCHI009230.m2;LITCHI009230.m4;LITCHI009230.m6;LITCHI014376.m…	K00012+K00012+K00012+K00012+K00012+K00326+K00326+K00770+K00820+K00844+K00844+K00844+K00844+K00844+K00844+K00844+K00844+K00844+K00844+K00847+K00847+K00847+K00847+K00847+K00847+K00847+K00847+K00963+K00963+K00966+K01205+K00966+K00972+K00975+K00975+K00975+K01183+K01183+K01183+K14638+K01183+K01183+K01711+K01784+K01784+K01809+K01809+K01809+K01810+K01810+K01051+K02377+K06118+K08678+K08678+K08678+K08678+…	110
ko00052	Galactose metabolism	1/98	16/218	0.999956	1	pmb2922	C00029	1	78/4627	348/21523	0.357924	1	LITCHI001937.m1;LITCHI017728.m1;LITCHI017728.m10;LITCHI017728.m2;LITCHI017728.m3;LITCHI017728.m4;LITCHI017728.m5;LITCHI017728.m6;LITCHI023638.m1;LITCHI030461.m1;LITCHI030461.m2;LITCHI007246.m1;LITCHI007246.m2;LITCHI007246.m3;LITCHI008992.m1;LITCHI008992.m2;LITCHI016150.m1;LITCHI017233.m3;LITCHI017702.m1;LITCHI025298.m1;LITCHI028866.m1;LITCHI029849.m1;LITCHI030438.m1;LITCHI030439.m1;LITCHI030440.m…	K00011+K00844+K00844+K00844+K00844+K00844+K00844+K00844+K00844+K00844+K00844+K00850+K00850+K00850+K00850+K00850+K07893+K00850+K00850+K07893+K07893+K00850+K00850+K00850+K00850+K00963+K00963+K01187+K01187+K01190+K01190+K01190+K07393+K01193+K01193+K01193+K01193+K01193+K01784+K01784+K01785+K01785+K06617+K06617+K06617+K06617+K06617+K06617+K06617+K06617+K07407+K07407+K07407+K07407+K07407+K07407+K12309+…	78
ko00740	Riboflavin metabolism	2/98	2/218	0.200947	1	mws0232;pme2746	C00255+C00016	2	17/4627	72/21523	0.375215	1	LITCHI021052.m1;LITCHI015552.m1;LITCHI015552.m2;LITCHI008696.m1;LITCHI017636.m1;LITCHI026891.m1;LITCHI026891.m2;LITCHI026891.m3;LITCHI025682.m1;LITCHI005948.m5;LITCHI023015.m1;BGI_novel_G000427;LITCHI019117.m1;LITCHI004106.m1;LITCHI020354.m1;LITCHI022111.m1;LITCHI006092.m1	K00793+K00794+K00794+K01513+K01513+K01513+K01513+K01513+K11752+K14379+K14379+K18453+K18453+K20884+K20884+K22912+K22949	17
ko00350	Tyrosine metabolism	4/98	5/218	0.127976	1	mws0376;mws0192;pme1002;mws0250	C00122+C00042+C00483+C00082	4	45/4627	200/21523	0.391642	1	LITCHI007374.m1;LITCHI003007.m2;LITCHI003009.m1;LITCHI003010.m1;LITCHI003012.m1;LITCHI010022.m1;LITCHI025927.m1;LITCHI002183.m1;LITCHI004875.m1;LITCHI004876.m1;LITCHI022471.m2;LITCHI022850.m1;LITCHI013042.m2;BGI_novel_G000629;LITCHI016926.m1;LITCHI013063.m1;LITCHI021008.m1;LITCHI011626.m3;LITCHI029709.m1;LITCHI024903.m1;LITCHI025006.m1;LITCHI025007.m1;LITCHI025021.m1;LITCHI025021.m2;LITCHI025028.…	K00121+K00121+K00121+K00121+K00121+K00121+K00121+K03028+K00276+K00276+K00276+K00276+K00451+K00457+K00811+K00815+K00815+K00817+K01555+K01593+K01593+K01593+K01593+K01593+K01593+K01593+K01593+K01593+K01593+K01593+K01800+K07253+K07253+K14454+K14455+K14455+K14455+K00816+K00816+K18606+K18857+K18857+K18857+K18857+K18857	45
ko00261	Monobactam biosynthesis	1/98	6/218	0.973737	1	mws0250	C00082	1	9/4627	39/21523	0.467127	1	LITCHI005872.m3;LITCHI015553.m1;LITCHI019422.m1;LITCHI011840.m1;LITCHI011840.m2;LITCHI011840.m3;LITCHI010145.m1;LITCHI014891.m1;LITCHI014891.m3	K00133+K00215+K01714+K12524+K12524+K12524+K13811+K13811+K13811	9
ko00040	Pentose and glucuronate interconversions	3/98	8/218	0.783687	1	pme2380;mws0344;pmb2922	C00026+C00502+C00029	3	93/4627	434/21523	0.533409	1	LITCHI005883.m2;LITCHI018341.m1;LITCHI018342.m1;LITCHI009266.m1;LITCHI001937.m1;LITCHI019406.m1;LITCHI023391.m1;LITCHI023391.m2;LITCHI023391.m3;LITCHI023391.m4;LITCHI024998.m1;LITCHI010748.m1;LITCHI008052.m1;LITCHI023482.m1;LITCHI004011.m1;LITCHI004225.m1;LITCHI007542.m1;LITCHI007634.m1;LITCHI008208.m1;LITCHI008208.m2;LITCHI008208.m3;LITCHI009125.m1;LITCHI009126.m1;LITCHI009127.m1;LITCHI009129.m1…	K00002+K00002+K00002+K00008+K00011+K00012+K00012+K00012+K00012+K00012+K04628+K00854+K00963+K00963+K15718+K01051+K01051+K01051+K01528+K01528+K01528+K01051+K01051+K01051+K01051+K15631+K01051+K01051+K01051+K01051+K01051+K02510+K16221+K01051+K01369+K01051+K01051+K01051+K01051+K01051+K01051+K17345+K17345+K01184+K01213+K01184+K01184+K01184+K01184+K01184+K17345+K01188+K05387+K04079+K01213+K01213+K01184+…	93
ko00910	Nitrogen metabolism	2/98	2/218	0.200947	1	pme0193;pme0014	C00064+C00025	2	28/4627	133/21523	0.583997	1	LITCHI003343.m10;LITCHI003343.m14;LITCHI003343.m2;LITCHI003343.m3;LITCHI003343.m8;LITCHI003343.m9;LITCHI020203.m1;LITCHI030012.m1;LITCHI009631.m1;LITCHI000236.m1;LITCHI008659.m1;LITCHI001625.m1;LITCHI007030.m1;BGI_novel_G000122;BGI_novel_G000124;LITCHI004943.m2;LITCHI018672.m1;LITCHI025583.m1;LITCHI029789.m1;LITCHI015222.m1;LITCHI006160.m1;LITCHI008105.m1;LITCHI018686.m1;LITCHI004905.m1;LITCHI020…	K00261+K00261+K00261+K00261+K00261+K00261+K00261+K00262+K00264+K00025+K00284+K00366+K01455+K01673+K01673+K01673+K01674+K12418+K01674+K01725+K01915+K01915+K01915+K02575+K02575+K10534+K10534+K13379	28
ko00190	Oxidative phosphorylation	4/98	4/218	0.0394625	1	mws0376;mws0192;pme2117;pmb0530	C00122+C00042+C00008+C00003	4	64/4627	303/21523	0.586425	1	LITCHI020839.m1;LITCHI021722.m1;LITCHI020696.m1;LITCHI020696.m2;LITCHI011449.m5;LITCHI018850.m1;LITCHI001339.m1;LITCHI018467.m1;LITCHI026768.m1;BGI_novel_G000220;BGI_novel_G000805;LITCHI000351.m1;LITCHI016431.m4;LITCHI017917.m1;LITCHI022228.m1;LITCHI029867.m1;LITCHI029631.m1;LITCHI001944.m1;LITCHI005708.m1;LITCHI025414.m8;LITCHI022629.m1;LITCHI019090.m1;LITCHI023368.m1;LITCHI023368.m2;LITCHI00438…	K00411+K00411+K00413+K00413+K00416+K00419+K01507+K01507+K01507+K14050+K14050+K12447+K01535+K01535+K01535+K01535+K02115+K02129+K02133+K02133+K02134+K02135+K02136+K02136+K02137+K02138+K02140+K02144+K02145+K02147+K02150+K02150+K02151+K02151+K02154+K02155+K02261+K02265+K14558+K02266+K02267+K03879+K03883+K03937+K03937+K03939+K03940+K03941+K03949+K03952+K03953+K03955+K21776+K21776+K03955+K03955+K03965+…	64
ko00998	Biosynthesis of various secondary metabolites - part 2	3/98	6/218	0.558725	1	mws2125;mws0250;mws0282	C00074+C00082+C00078	3	3/4627	15/21523	0.656075	1	LITCHI007295.m1;LITCHI019769.m1;LITCHI019770.m1	K21568+K21568+K21568	3
ko00960	Tropane, piperidine and pyridine alkaloid biosynthesis	3/98	5/218	0.405165	1	pme0490;mws0258;pme0026	C00253+C00407+C00047	3	22/4627	111/21523	0.702476	1	LITCHI002183.m1;LITCHI004875.m1;LITCHI004876.m1;LITCHI022471.m2;LITCHI022850.m1;LITCHI016926.m1;LITCHI013063.m1;LITCHI021008.m1;LITCHI011626.m3;LITCHI018353.m1;LITCHI018355.m1;LITCHI024968.m1;LITCHI024968.m2;LITCHI024968.m3;LITCHI024969.m1;LITCHI017131.m1;LITCHI020904.m1;LITCHI020904.m2;LITCHI020904.m3;LITCHI011229.m1;LITCHI011229.m3;LITCHI030587.m1	K03028+K00276+K00276+K00276+K00276+K00811+K00815+K00815+K00817+K08081+K08081+K08081+K08081+K08081+K08081+K14454+K14455+K14455+K14455+K00816+K00816+K18606	22
ko00290	Valine, leucine and isoleucine biosynthesis	4/98	8/218	0.522777	1	mws0256;mws0227;mws0258;pmb3101	C00183+C00123+C00407+C02504	4	21/4627	108/21523	0.7339	1	LITCHI018771.m1;LITCHI028378.m2;LITCHI020938.m1;LITCHI029048.m1;LITCHI005462.m1;LITCHI005462.m2;LITCHI007122.m1;LITCHI007123.m1;LITCHI010771.m1;LITCHI019289.m1;LITCHI004389.m1;LITCHI012599.m1;LITCHI024089.m1;LITCHI025692.m1;LITCHI015623.m1;LITCHI015111.m1;LITCHI024268.m1;LITCHI024268.m9;LITCHI015197.m2;LITCHI018746.m1;LITCHI018746.m3	K00052+K00052+K00053+K00053+K18626+K18626+K00826+K00826+K00826+K18626+K00549+K01652+K00549+K00549+K01653+K01687+K02356+K02356+K01703+K01754+K01754	21
ko04122	Sulfur relay system	1/98	2/218	0.698136	1	mws1050	C00979	1	8/4627	43/21523	0.734431	1	LITCHI009709.m1;LITCHI004324.m1;LITCHI013901.m1;LITCHI013901.m3;LITCHI017126.m1;LITCHI017126.m3;LITCHI023732.m1;LITCHI030594.m1	K01011+K03639+K11996+K11996+K11996+K11996+K11996+K11996	8
ko00240	Pyrimidine metabolism	10/98	18/218	0.242349	1	pme1975;mws0470;Lmgn000160;pme0193;pme2165;pme0264;mws0248;pme1373;pme3188;pmb2922	C00383+C02170+C02642+C00064+C00295+C00214+C00299+C00239+C00105+C00029	10	56/4627	282/21523	0.770855	1	LITCHI023006.m1;LITCHI005891.m1;LITCHI018335.m1;LITCHI020895.m1;LITCHI021439.m1;LITCHI029749.m1;LITCHI020729.m1;LITCHI020729.m3;LITCHI020729.m9;LITCHI023276.m1;BGI_novel_G000117;LITCHI010749.m3;LITCHI021934.m1;LITCHI021935.m1;LITCHI022577.m1;LITCHI025346.m4;LITCHI009303.m1;LITCHI020691.m1;LITCHI026383.m1;LITCHI027054.m4;LITCHI015561.m1;LITCHI018823.m1;LITCHI001268.m1;LITCHI023740.m1;LITCHI023740.…	K00207+K00254+K00761+K22565+K00857+K00857+K00876+K00876+K00876+K00876+K00940+K00940+K00940+K00940+K00940+K00940+K00943+K00943+K00943+K01081+K01240+K01240+K01431+K01464+K01464+K01465+K01489+K01493+K01510+K01510+K01510+K01513+K01513+K01513+K01513+K01513+K01520+K01520+K01520+K01937+K01937+K01956+K01956+K01956+K03787+K09903+K09903+K10807+K10807+K10808+K13421+K13800+K13998+K16329+K16904+K16904	56
ko00460	Cyanoamino acid metabolism	3/98	7/218	0.685846	1	mws0256;mws0258;mws0250	C00183+C00407+C00082	3	54/4627	274/21523	0.78666	1	LITCHI000391.m1;LITCHI003655.m1;LITCHI010719.m4;LITCHI010719.m5;LITCHI014986.m1;LITCHI014991.m1;LITCHI017257.m1;LITCHI017682.m1;LITCHI001367.m1;LITCHI005156.m1;LITCHI005156.m6;LITCHI005288.m1;LITCHI007118.m1;LITCHI007118.m2;LITCHI007612.m1;LITCHI017323.m3;LITCHI026442.m1;LITCHI027300.m1;LITCHI029936.m1;LITCHI029940.m1;LITCHI031618.m2;LITCHI031619.m1;LITCHI007030.m1;LITCHI003364.m2;LITCHI003364.m3…	K00600+K00600+K00600+K00600+K00600+K00600+K00600+K17732+K01188+K01188+K01188+K01188+K01188+K01188+K08331+K22733+K01188+K01188+K01188+K01188+K01188+K01188+K01455+K05349+K05349+K05349+K05349+K05349+K05349+K11843+K05350+K06911+K05350+K05350+K05350+K01322+K01322+K05350+K05350+K05350+K22706+K22706+K22706+K22706+K22706+K20802+K13034+K13034+K13051+K05387+K18592+K18592+K20802+K20802	54
ko00920	Sulfur metabolism	4/98	6/218	0.251605	1	mws0192;mws0236;pme0057;mws1050	C00042+C00245+C00155+C00979	4	36/4627	188/21523	0.808627	1	LITCHI020741.m2;LITCHI020741.m7;LITCHI019034.m1;LITCHI019034.m2;LITCHI013723.m1;LITCHI017650.m1;LITCHI007060.m1;LITCHI007063.m1;LITCHI007063.m14;LITCHI007063.m19;LITCHI007063.m20;LITCHI007063.m3;LITCHI007063.m4;LITCHI009709.m1;LITCHI005158.m1;LITCHI013224.m1;LITCHI029272.m1;LITCHI003695.m2;LITCHI015457.m1;LITCHI019502.m1;LITCHI019502.m2;LITCHI019502.m3;LITCHI019502.m4;LITCHI019502.m5;LITCHI021309…	K00387+K00387+K00392+K00392+K00640+K00640+K00860+K00860+K00860+K00860+K00860+K00860+K00860+K01011+K01082+K01082+K01082+K01738+K01738+K01739+K01739+K01739+K01739+K01739+K05907+K05907+K13034+K13034+K13811+K13811+K13811+K15422+K15422+K15422+K17285+K17285	36
ko00908	Zeatin biosynthesis	8/98	10/218	0.0244831	1	pme0040;mws1050;pme2060;pme1474;pmb0981;pme2117;Zmfn000481;pmb2922	C00147+C00979+C04083+C00170+C00020+C00008+C00190+C00029	8	19/4627	104/21523	0.821231	1	LITCHI005554.m1;BGI_novel_G001024;LITCHI008790.m1;LITCHI008798.m1;LITCHI008798.m2;LITCHI008798.m3;LITCHI001576.m1;LITCHI010510.m1;LITCHI015420.m1;LITCHI015425.m1;LITCHI015438.m1;LITCHI015490.m1;LITCHI018709.m1;LITCHI018713.m3;LITCHI018713.m4;LITCHI019763.m1;LITCHI019764.m1;LITCHI020510.m1;LITCHI025200.m1	K10760+K13495+K13495+K13495+K13495+K13495+K14595+K13496+K13496+K13496+K13496+K13496+K13496+K13496+K13496+K13496+K13496+K13496+K08237	19
ko00300	Lysine biosynthesis	5/98	7/218	0.148387	1	pme2380;pme0026;pme2589;pme0278;pme1712	C00026+C00047+C00322+C00666+C00449	5	8/4627	49/21523	0.855931	1	LITCHI005872.m3;LITCHI015553.m1;LITCHI001849.m1;LITCHI019422.m1;LITCHI018476.m1;LITCHI011840.m1;LITCHI011840.m2;LITCHI011840.m3	K00133+K00215+K01586+K01714+K01778+K12524+K12524+K12524	8
ko00400	Phenylalanine, tyrosine and tryptophan biosynthesis	6/98	10/218	0.255796	1	mws2125;ML10176345;mws0154;mws0250;mws0277;mws0282	C00074+C02637+C00493+C00082+C00296+C00078	6	37/4627	199/21523	0.862696	1	LITCHI004869.m2;LITCHI025528.m1;LITCHI016926.m1;LITCHI013063.m1;LITCHI021008.m1;LITCHI011626.m3;LITCHI020481.m4;LITCHI007298.m1;LITCHI010548.m1;LITCHI025090.m1;LITCHI025094.m1;LITCHI005942.m1;LITCHI026132.m1;LITCHI013419.m1;LITCHI006432.m1;LITCHI027861.m1;LITCHI027324.m1;LITCHI019462.m1;LITCHI021308.m1;LITCHI024511.m1;LITCHI024511.m2;LITCHI029623.m2;LITCHI019253.m1;LITCHI003790.m1;LITCHI003791.m1…	K00766+K00800+K00811+K00815+K00815+K00817+K00891+K01626+K01626+K01657+K01657+K01658+K01695+K01696+K01735+K01736+K01817+K01850+K05359+K05359+K05359+K05359+K06001+K13832+K13832+K13832+K23048+K23048+K23048+K14454+K14455+K14455+K14455+K15227+K15227+K00816+K00816	37
ko01210	2-Oxocarboxylic acid metabolism	14/98	23/218	0.0809272	1	mws0256;mws0227;mws0258;pme2527;pme2380;pme0026;pme0014;pme1210;pme2589;pmb3101;mws0250;pme0075;Zmyn000453;mws0282	C00183+C00123+C00407+C00077+C00026+C00047+C00025+C00073+C00322+C02504+C00082+C00624+C00311+C00078	14	58/4627	304/21523	0.865984	1	LITCHI006357.m2;LITCHI018601.m1;LITCHI008074.m1;LITCHI008074.m2;LITCHI009808.m1;LITCHI020560.m2;LITCHI018771.m1;LITCHI028378.m2;LITCHI020938.m1;LITCHI029048.m1;LITCHI005872.m3;LITCHI001691.m1;LITCHI006889.m1;LITCHI014936.m1;LITCHI020912.m1;LITCHI020952.m1;LITCHI018429.m1;LITCHI016926.m1;LITCHI029890.m1;LITCHI028276.m1;LITCHI005462.m1;LITCHI005462.m2;LITCHI007122.m1;LITCHI007123.m1;LITCHI010771.m1…	K00030+K00030+K00031+K00031+K00031+K00031+K00052+K00052+K00053+K00053+K00133+K00145+K16818+K16818+K00145+K00145+K00620+K00811+K00814+K00818+K18626+K18626+K00826+K00826+K00826+K18626+K14396+K01438+K01647+K01647+K01647+K00549+K01652+K00549+K00549+K01653+K01681+K01681+K01681+K01681+K01681+K01681+K01681+K01681+K01681+K01687+K02356+K02356+K01703+K11820+K11820+K14272+K14454+K14455+K14455+K14455+K14677+…	58
ko00660	C5-Branched dibasic acid metabolism	3/98	4/218	0.238852	1	pme2380;Zmzn000113;pme0014	C00026+C03618+C00025	3	8/4627	50/21523	0.871002	1	LITCHI018771.m1;LITCHI028378.m2;LITCHI004389.m1;LITCHI012599.m1;LITCHI024089.m1;LITCHI025692.m1;LITCHI015623.m1;LITCHI015197.m2	K00052+K00052+K00549+K01652+K00549+K00549+K01653+K01703	8
ko00130	Ubiquinone and other terpenoid-quinone biosynthesis	1/98	2/218	0.698136	1	mws0250	C00082	1	34/4627	196/21523	0.937267	1	BGI_novel_G000629;LITCHI016493.m1;LITCHI031057.m1;LITCHI021635.m1;LITCHI013063.m1;LITCHI021008.m1;LITCHI004927.m1;LITCHI022892.m1;LITCHI002917.m1;LITCHI002917.m10;LITCHI002917.m6;LITCHI016367.m1;LITCHI031673.m2;LITCHI031673.m3;LITCHI013320.m1;LITCHI013320.m2;LITCHI025091.m1;LITCHI025098.m1;LITCHI025099.m1;LITCHI029374.m4;LITCHI015102.m1;LITCHI020709.m1;BGI_novel_G001105;LITCHI016433.m1;LITCHI0056…	K00457+K00487+K00487+K00591+K00815+K00815+K01661+K01661+K01904+K01904+K01904+K01904+K01904+K01904+K03809+K03809+K03809+K22950+K22950+K03809+K06126+K06126+K14050+K09833+K12501+K12501+K12501+K12502+K12502+K12502+K14759+K14759+K18606+K19222	34
ko00310	Lysine degradation	8/98	10/218	0.0244831	1	pme0120;mws0192;pme0243;pme2380;pme0026;Lmbn001467;pme2589;pme1712	C00431+C00042+C00489+C00026+C00047+C03087+C00322+C00449	8	53/4627	296/21523	0.946141	1	LITCHI004975.m2;LITCHI004975.m4;LITCHI006531.m1;LITCHI006531.m6;LITCHI011264.m1;LITCHI014486.m1;LITCHI020434.m1;LITCHI020508.m1;LITCHI020508.m2;LITCHI022360.m1;BGI_novel_G000088;LITCHI021254.m1;LITCHI014314.m1;LITCHI014393.m2;LITCHI021501.m1;LITCHI029812.m1;LITCHI013926.m1;LITCHI013926.m3;LITCHI017695.m2;LITCHI021314.m1;LITCHI006720.m1;LITCHI006720.m3;LITCHI025971.m2;LITCHI008506.m1;LITCHI012972.…	K00128+K00128+K00128+K00128+K00128+K00128+K17345+K00128+K00128+K00128+K00306+K00306+K00382+K00382+K00626+K00626+K00658+K00658+K00658+K00658+K11419+K11419+K11420+K11420+K11420+K11420+K11420+K11420+K11420+K11422+K11423+K11423+K11423+K00627+K11426+K02335+K11430+K11430+K14085+K14085+K14085+K14085+K14085+K14085+K14157+K14157+K14412+K14412+K12309+K12309+K12309+K14638+K22748	53
ko00900	Terpenoid backbone biosynthesis	1/98	1/218	0.449541	1	pme3154	C00418	1	34/4627	201/21523	0.956237	1	LITCHI002211.m1;LITCHI002211.m2;LITCHI006290.m1;LITCHI009869.m1;LITCHI022382.m1;LITCHI021501.m1;LITCHI029812.m1;LITCHI013583.m2;LITCHI003953.m1;LITCHI019799.m1;LITCHI001105.m1;LITCHI027124.m1;LITCHI007204.m1;LITCHI007204.m2;LITCHI014609.m1;LITCHI016334.m1;LITCHI016334.m4;LITCHI002554.m1;LITCHI001758.m1;LITCHI007428.m1;LITCHI007428.m3;LITCHI018835.m1;LITCHI023447.m1;LITCHI001791.m5;LITCHI002137.m1…	K00021+K00021+K00021+K00021+K00099+K00626+K00626+K00787+K00869+K00938+K00991+K01597+K01662+K01662+K01662+K01662+K01662+K01823+K03527+K05906+K05906+K08658+K10960+K11778+K13789+K13789+K13789+K15889+K15889+K15889+K15891+K15891+K19073+K15892	34
ko00860	Porphyrin and chlorophyll metabolism	1/98	2/218	0.698136	1	pme0014	C00025	1	36/4627	212/21523	0.957856	1	LITCHI019173.m1;LITCHI019175.m1;LITCHI026697.m1;LITCHI024998.m1;LITCHI027466.m2;LITCHI021747.m1;LITCHI000386.m1;LITCHI015167.m1;LITCHI020293.m1;LITCHI001853.m1;LITCHI002209.m1;LITCHI005743.m1;LITCHI005779.m1;LITCHI008874.m1;LITCHI029087.m1;LITCHI008501.m1;LITCHI018180.m1;LITCHI014864.m1;LITCHI005723.m2;LITCHI016949.m1;LITCHI016949.m2;LITCHI016949.m6;LITCHI031875.m1;LITCHI023447.m1;LITCHI016867.m1…	K00228+K00228+K00231+K04628+K01599+K01698+K01772+K01772+K01845+K01885+K01885+K17471+K01885+K03403+K03405+K04035+K04040+K08099+K08101+K08101+K08101+K08101+K08101+K10960+K13071+K13071+K13071+K13071+K13071+K13071+K13544+K13544+K13544+K13600+K19073+K00430	36
ko00760	Nicotinate and nicotinamide metabolism	8/98	12/218	0.104624	1	pme3011;mws0376;mws0192;mws0133;pme0490;pma3101;pmb0530;pme2651	C00334+C00122+C00042+C00153+C00253+C05841+C00003+C00006	8	20/4627	129/21523	0.965731	1	LITCHI020527.m1;LITCHI020527.m2;LITCHI020527.m3;LITCHI011289.m2;LITCHI023907.m11;LITCHI027054.m4;LITCHI015561.m1;LITCHI018823.m1;LITCHI008696.m1;LITCHI017636.m1;LITCHI026891.m1;LITCHI026891.m2;LITCHI026891.m3;LITCHI021876.m1;BGI_novel_G000189;LITCHI014136.m1;LITCHI022501.m1;LITCHI017603.m1;LITCHI016134.m3;LITCHI013701.m1	K00278+K00278+K00278+K00858+K00858+K01081+K01240+K01240+K01513+K01513+K01513+K01513+K01513+K01950+K11593+K03113+K03517+K03787+K06210+K11416	20
ko00232	Caffeine metabolism	1/98	2/218	0.698136	1	mws0668	C01762	1	1/4627	15/21523	0.973537	1	LITCHI029559.m1	K07409	1
ko04075	Plant hormone signal transduction	3/98	4/218	0.238852	1	pme2060;pme1654;pme2074	C04083+C08491+C18699	3	243/4627	1270/21523	0.985075	1	LITCHI002255.m9;LITCHI005070.m1;LITCHI010783.m1;LITCHI013321.m1;LITCHI015696.m2;LITCHI026131.m1;LITCHI026700.m1;LITCHI026971.m1;LITCHI020925.m1;LITCHI028586.m1;LITCHI029036.m1;LITCHI029036.m2;LITCHI005968.m1;LITCHI007693.m1;LITCHI013084.m1;LITCHI013084.m2;LITCHI013084.m3;LITCHI013084.m4;LITCHI013084.m5;LITCHI023417.m1;LITCHI028660.m1;LITCHI029019.m1;LITCHI029149.m1;LITCHI023839.m1;LITCHI007166.m1…	K12126+K04733+K11253+K05765+K11253+K16189+K12126+K11253+K13413+K13413+K13413+K13413+K13415+K13415+K13415+K13415+K13415+K13415+K13415+K13420+K13420+K13415+K13415+K13418+K13422+K13422+K07560+K18486+K13422+K13422+K13422+K22484+K13449+K13449+K20412+K13463+K13464+K13464+K13464+K13946+K13946+K13946+K14431+K14431+K14431+K14431+K14431+K14432+K14432+K09060+K14432+K14432+K14432+K14432+K04450+K14484+K14484+…	243
ko00966	Glucosinolate biosynthesis	6/98	9/218	0.160036	1	mws0256;mws0227;mws0258;pme1210;mws0250;mws0282	C00183+C00123+C00407+C00073+C00082+C00078	6	9/4627	77/21523	0.991371	1	LITCHI005462.m1;LITCHI005462.m2;LITCHI007122.m1;LITCHI007123.m1;LITCHI010771.m1;LITCHI019289.m1;LITCHI015197.m2;LITCHI005027.m1;LITCHI022315.m1	K18626+K18626+K00826+K00826+K00826+K18626+K01703+K11820+K11820	9
ko00970	Aminoacyl-tRNA biosynthesis	11/98	17/218	0.0736054	1	pme0006;mws0256;mws0227;mws0258;pme0193;pme0026;pme0014;pme1210;mws0254;mws0250;mws0282	C00148+C00183+C00123+C00407+C00064+C00047+C00025+C00073+C00135+C00082+C00078	11	46/4627	293/21523	0.995145	1	LITCHI004285.m1;LITCHI004290.m1;LITCHI021653.m1;LITCHI021743.m1;LITCHI021428.m1;LITCHI000759.m1;LITCHI015840.m1;LITCHI026208.m1;LITCHI026523.m1;LITCHI031092.m1;BGI_novel_G000421;LITCHI002106.m1;LITCHI014515.m1;LITCHI009664.m1;LITCHI027755.m1;LITCHI021724.m1;LITCHI003664.m1;LITCHI030297.m1;LITCHI030308.m1;LITCHI005567.m3;LITCHI016957.m1;LITCHI016957.m2;LITCHI016957.m3;LITCHI020416.m3;LITCHI001853.…	K17265+K17265+K01866+K01866+K01868+K01869+K01870+K14834+K10773+K01870+K03086+K01872+K01872+K01873+K01874+K01880+K01881+K01881+K01881+K01883+K01883+K01883+K01883+K01883+K01885+K01885+K17471+K01885+K01887+K01892+K01892+K01892+K01892+K01893+K13998+K02433+K02433+K02433+K02433+K02434+K04567+K04567+K14164+K22503+K04733+K04733	46

## Sheet: Table S9
Table S9. Sampling dates of the litchi fruits from the two varieties.
Sample name	Year	Month	Day
B8S1	2019	5	29
B8S2	2019	6	3
B8S3	2019	6	5
B8S4	2019	6	9
B8S5	2019	6	17
HZS1	2019	5	29
HZS2	2019	6	4
HZS3	2019	6	8
HZS4	2019	6	17
HZS5	2019	6	28

## Sheet: Table S10
Table S10. List of primers used for the qRT-PCR analysis.
Gene	Reverse primer sequence	Forward primer sequence
LITCHI014080.m1	TGTTGTTTGACCGTCTTCCA	TCGGGCTAGAAACCAACAGT
LITCHI014121.m1	TCCTGAATTCAAACGCATTG	TCCTAAACCCTCTGCACCAC
LITCHI005883.m1	CATTAACACCATTACGCAAACA	TTTGGCAAAACTGCAATGAA
LITCHI009351.m2	TGCAAGGACAACCAAAATCA	TGCACTGCATTGTCTCCTTT
LITCHI009351.m1	CCAGCTCTATTGTGCGTTGA	CACTGCTTTCTCTGAAAGGCT
LITCHI009351.m4	TCAGGAAGAAAGAATTGCTGC	CAACCCAACCATCCTGACTC
LITCHI014973.m1	GATGGGGAAAGAGATTGGGT	AATCGACGTAATTTATCCTT
LITCHI015351.m4	GCTTCCACCTAGCTCGGTTAT	CCAGCAATCATGTCTGCTTAAT
LITCHI015351.m3	CGCCTTTCTCCTCCTTATCC	GTCTTACGTCCAAATTTCT
LITCHI004325.m6	ACTGCACCCTCTGCATTTTT	GCACGTGTGGGGTACCTTTA
LITCHI020148.m5	TCAGTGTACCACAAGC	CTCTCAATCATTTGTTTATG
LITCHI003343.m3	CACACCACCAACGCATATC	AGCAACGATTCACGACATTG
LITCHI014417.m1	GTGAGTATTTCGGGAGT	TCCATGCATCTTTTACACTGAA
LITCHI018688.m1	GTCCGTCAACTCGATCACCT	TTCAACCACCCCATCATT
LITCHI017210.m2	GCCATTTCTTCATTTGGTGC	GCATTTCAATTTCACCCC
